# Supplementary material for: Cell Stiffness Is a Biomarker of the Metastatic Potential of Ovarian Cancer Cells
Source: PLoS One. 2012 Oct 4;7(10):e46609. doi: 10.1371/journal.pone.0046609 (PMC3464294; doi:10.1371/journal.pone.0046609)
Supplement: File S1 — Results of differential expression analysis by Significance Analysis of Microarrays (SAM). Using Significance Analysis of Microarrays (SAM), 3,641 differentially expressed features were identified between HEY A8 and HEY cell lines (FDR = 1.1% and |FC|≥1.5). 1,258 genes were up-regulated and 1,272 genes were down-regulated. (XLS) [file pone.0046609.s003.xls]

## Sheet: annotated features
Gene ID	Gene Name	Score(d)	Numerator(r)	Denominator(s+s0)	Fold Change	q-value(%)	localfdr(%)	HEY - 1.oct2011-4points-second.rma-Signal	HEY - 2.oct2011-4points-second.rma-Signal	HEY A8 - 1.oct2011-4points-second.rma-Signal	HEY A8 - 2.oct2011-4points-second.rma-Signal	lograt	FC	t-test	Representative Public ID	Gene Title	Gene Symbol	RefSeq Transcript ID	Gene Ontology Biological Process	Gene Ontology Cellular Component	Gene Ontology Molecular Function	Pathway	EMT	EMTgene	RES	RESgene
228335_at	CLDN11	9.68821	5.59037	0.577028	48.1801	0	0.0216248	5.17772	5.06983	10.4043	11.024	5.59037	48.1801	0.00314997	AW264204	claudin 11	CLDN11	NM_001185056 /// NM_005602	0007155 // cell adhesion // inferred from electronic annotation /// 0007283 // spermatogenesis // inferred from electronic annotation /// 0008366 // axon ensheathment // inferred from electronic annotation /// 0016338 // calcium-independent cell-cell adhesion // inferred from sequence or structural similarity	0005886 // plasma membrane // inferred from electronic annotation /// 0005923 // tight junction // inferred from sequence or structural similarity /// 0005923 // tight junction // inferred from electronic annotation /// 0016020 // membrane // inferred from electronic annotation /// 0016021 // integral to membrane // inferred from electronic annotation /// 0030054 // cell junction // inferred from…	0005198 // structural molecule activity // inferred from electronic annotation /// 0005515 // protein binding // inferred from electronic annotation /// 0042802 // identical protein binding // inferred from sequence or structural similarity	---
210095_s_at	IGFBP3	11.5655	4.6291	0.400251	24.7456	0	0.0617292	7.82764	7.63311	12.262	12.457	4.6291	24.7456	0.000883995	M31159	insulin-like growth factor binding protein 3	IGFBP3	NM_000598 /// NM_001013398	0001558 // regulation of cell growth // inferred from electronic annotation /// 0001649 // osteoblast differentiation // inferred from electronic annotation /// 0001933 // negative regulation of protein phosphorylation // inferred from direct assay /// 0006468 // protein phosphorylation // inferred from direct assay /// 0008285 // negative regulation of cell proliferation // inferred from genetic…	0005576 // extracellular region // not recorded /// 0005576 // extracellular region // non-traceable author statement /// 0005576 // extracellular region // inferred from electronic annotation /// 0005615 // extracellular space // inferred from direct assay /// 0005615 // extracellular space // inferred from electronic annotation /// 0005625 // soluble fraction // inferred from electronic annotat…	0005515 // protein binding // inferred from physical interaction /// 0005515 // protein binding // inferred from electronic annotation /// 0005520 // insulin-like growth factor binding // non-traceable author statement /// 0005520 // insulin-like growth factor binding // inferred from electronic annotation /// 0008160 // protein tyrosine phosphatase activator activity // inferred from direct assa…	Smooth_muscle_contraction // GenMAPP
227671_at	XIST	11.3947	4.49967	0.394892	22.6222	0	0.0652414	4.87113	5.0384	9.55703	9.35184	4.49967	22.6222	0.000864207	AV646597	X (inactive)-specific transcript (non-protein coding)	XIST	NR_001564	---	---	---	---
212143_s_at	IGFBP3	14.8712	4.35146	0.29261	20.4136	0	0	7.49623	7.47243	11.8634	11.8082	4.35146	20.4136	4.779e-05	BF340228	insulin-like growth factor binding protein 3	IGFBP3	NM_000598 /// NM_001013398	0001558 // regulation of cell growth // inferred from electronic annotation /// 0001649 // osteoblast differentiation // inferred from electronic annotation /// 0001933 // negative regulation of protein phosphorylation // inferred from direct assay /// 0006468 // protein phosphorylation // inferred from direct assay /// 0008285 // negative regulation of cell proliferation // inferred from genetic…	0005576 // extracellular region // not recorded /// 0005576 // extracellular region // non-traceable author statement /// 0005576 // extracellular region // inferred from electronic annotation /// 0005615 // extracellular space // inferred from direct assay /// 0005615 // extracellular space // inferred from electronic annotation /// 0005625 // soluble fraction // inferred from electronic annotat…	0005515 // protein binding // inferred from physical interaction /// 0005515 // protein binding // inferred from electronic annotation /// 0005520 // insulin-like growth factor binding // non-traceable author statement /// 0005520 // insulin-like growth factor binding // inferred from electronic annotation /// 0008160 // protein tyrosine phosphatase activator activity // inferred from direct assa…	Smooth_muscle_contraction // GenMAPP
218755_at	KIF20A	10.6772	4.0374	0.378134	16.4202	0	0.0703148	7.08544	7.00995	11.1944	10.9758	4.0374	16.4202	0.000818896	NM_005733	kinesin family member 20A	KIF20A	NM_005733	0006810 // transport // inferred from electronic annotation /// 0007018 // microtubule-based movement // inferred from electronic annotation /// 0015031 // protein transport // inferred from electronic annotation /// 0016192 // vesicle-mediated transport // traceable author statement	0005654 // nucleoplasm // not recorded /// 0005794 // Golgi apparatus // inferred from electronic annotation /// 0005794 // Golgi apparatus // traceable author statement /// 0005874 // microtubule // inferred from electronic annotation	0000166 // nucleotide binding // inferred from electronic annotation /// 0003774 // motor activity // inferred from electronic annotation /// 0003777 // microtubule motor activity // inferred from electronic annotation /// 0005215 // transporter activity // traceable author statement /// 0005515 // protein binding // inferred from physical interaction /// 0005515 // protein binding // inferred fr…	---
225242_s_at	CCDC80	9.417	3.57099	0.379207	11.8843	0	0	8.32119	8.54947	11.9821	12.0305	3.57099	11.8843	0.0010659	AW303375	coiled-coil domain containing 80	CCDC80	NM_199511 /// NM_199512	0010811 // positive regulation of cell-substrate adhesion // inferred from electronic annotation /// 0030198 // extracellular matrix organization // inferred from electronic annotation	0005576 // extracellular region // inferred from electronic annotation /// 0005578 // proteinaceous extracellular matrix // inferred from electronic annotation /// 0005604 // basement membrane // inferred from electronic annotation /// 0005614 // interstitial matrix // inferred from electronic annotation /// 0019031 // viral envelope // inferred from electronic annotation /// 0031012 // extracell…	0001968 // fibronectin binding // inferred from electronic annotation /// 0005539 // glycosaminoglycan binding // inferred from electronic annotation /// 0008201 // heparin binding // inferred from electronic annotation	---
232278_s_at	DEPDC1	7.20176	3.25643	0.452172	9.55618	0	0	7.3779	7.15234	10.674	10.3691	3.25643	9.55618	0.00337437	AJ278112	DEP domain containing 1	DEPDC1	NM_001114120 /// NM_017779	0007165 // signal transduction // inferred from electronic annotation	0005622 // intracellular // inferred from electronic annotation /// 0005634 // nucleus // inferred from electronic annotation	0005096 // GTPase activator activity // inferred from electronic annotation	---
1555758_a_at	CDKN3	8.88758	3.24992	0.36567	9.51312	0	0	8.00553	7.96261	11.3349	11.1331	3.24992	9.51312	0.00100571	AF213040	cyclin-dependent kinase inhibitor 3	CDKN3	NM_001130851 /// NM_005192	0000079 // regulation of cyclin-dependent protein kinase activity // traceable author statement /// 0000082 // G1/S transition of mitotic cell cycle // traceable author statement /// 0007049 // cell cycle // inferred from electronic annotation /// 0007050 // cell cycle arrest // inferred from direct assay /// 0007050 // cell cycle arrest // traceable author statement /// 0008285 // negative regul…	0005737 // cytoplasm // inferred from electronic annotation /// 0048471 // perinuclear region of cytoplasm // inferred from direct assay /// 0048471 // perinuclear region of cytoplasm // inferred from electronic annotation	0004721 // phosphoprotein phosphatase activity // inferred from electronic annotation /// 0004722 // protein serine/threonine phosphatase activity // inferred from direct assay /// 0004725 // protein tyrosine phosphatase activity // inferred from direct assay /// 0004725 // protein tyrosine phosphatase activity // inferred from electronic annotation /// 0005515 // protein binding // inferred from…	---
205381_at	LRRC17	5.61311	3.0929	0.551013	8.53208	0	0	7.44815	6.98555	10.4822	10.1373	3.0929	8.53208	0.00858807	NM_005824	leucine rich repeat containing 17	LRRC17	NM_001031692 /// NM_005824	0001503 // ossification // inferred from electronic annotation /// 0001649 // osteoblast differentiation // inferred from sequence or structural similarity /// 0033687 // osteoblast proliferation // inferred from sequence or structural similarity /// 0045671 // negative regulation of osteoclast differentiation // inferred from sequence or structural similarity /// 0045671 // negative regulation o…	0005576 // extracellular region // inferred from electronic annotation /// 0005615 // extracellular space // inferred from sequence or structural similarity /// 0005615 // extracellular space // inferred from electronic annotation	0005515 // protein binding // inferred from electronic annotation	---
214710_s_at	CCNB1	9.42066	3.07841	0.326772	8.44684	0	0	9.07024	8.95968	12.1261	12.0606	3.07841	8.44684	0.000435251	BE407516	cyclin B1	CCNB1	NM_031966	0000086 // G2/M transition of mitotic cell cycle // non-traceable author statement /// 0000236 // mitotic prometaphase // inferred from direct assay /// 0000278 // mitotic cell cycle // inferred from electronic annotation /// 0001556 // oocyte maturation // inferred from electronic annotation /// 0001701 // in utero embryonic development // inferred from electronic annotation /// 0001933 // negat…	0000922 // spindle pole // inferred from direct assay /// 0000942 // condensed nuclear chromosome outer kinetochore // inferred from direct assay /// 0005624 // membrane fraction // inferred from electronic annotation /// 0005625 // soluble fraction // inferred from electronic annotation /// 0005634 // nucleus // inferred from direct assay /// 0005634 // nucleus // inferred from electronic annota…	0005515 // protein binding // inferred from physical interaction /// 0005515 // protein binding // inferred from electronic annotation /// 0016301 // kinase activity // inferred from electronic annotation /// 0019901 // protein kinase binding // inferred from electronic annotation /// 0032403 // protein complex binding // inferred from electronic annotation /// 0035173 // histone kinase activity …	Cell_cycle_KEGG // GenMAPP /// G1_to_S_cell_cycle_Reactome // GenMAPP
201842_s_at	EFEMP1	7.52877	3.05395	0.405637	8.3048	0	0	7.14429	7.35097	10.4006	10.2026	3.05395	8.3048	0.00218869	AI826799	EGF-containing fibulin-like extracellular matrix protein 1	EFEMP1	NM_001039348 /// NM_001039349 /// NM_004105	0007173 // epidermal growth factor receptor signaling pathway // inferred from direct assay /// 0007601 // visual perception // traceable author statement /// 0018108 // peptidyl-tyrosine phosphorylation // inferred from direct assay /// 0032331 // negative regulation of chondrocyte differentiation // inferred from direct assay /// 0045449 // regulation of transcription // inferred from direct as…	0005576 // extracellular region // inferred from electronic annotation /// 0005578 // proteinaceous extracellular matrix // traceable author statement /// 0005615 // extracellular space // inferred from direct assay /// 0031012 // extracellular matrix // inferred from direct assay	0005006 // epidermal growth factor receptor activity // inferred from direct assay /// 0005154 // epidermal growth factor receptor binding // inferred from direct assay /// 0005509 // calcium ion binding // inferred from electronic annotation /// 0005515 // protein binding // inferred from physical interaction	---
209714_s_at	CDKN3	7.5482	3.01788	0.399814	8.09976	0	0	8.00842	8.27696	11.132	11.1892	3.01788	8.09976	0.00206304	AF213033	cyclin-dependent kinase inhibitor 3	CDKN3	NM_001130851 /// NM_005192	0000079 // regulation of cyclin-dependent protein kinase activity // traceable author statement /// 0000082 // G1/S transition of mitotic cell cycle // traceable author statement /// 0007049 // cell cycle // inferred from electronic annotation /// 0007050 // cell cycle arrest // inferred from direct assay /// 0007050 // cell cycle arrest // traceable author statement /// 0008285 // negative regul…	0005737 // cytoplasm // inferred from electronic annotation /// 0048471 // perinuclear region of cytoplasm // inferred from direct assay /// 0048471 // perinuclear region of cytoplasm // inferred from electronic annotation	0004721 // phosphoprotein phosphatase activity // inferred from electronic annotation /// 0004722 // protein serine/threonine phosphatase activity // inferred from direct assay /// 0004725 // protein tyrosine phosphatase activity // inferred from direct assay /// 0004725 // protein tyrosine phosphatase activity // inferred from electronic annotation /// 0005515 // protein binding // inferred from…	---
222958_s_at	DEPDC1	6.85855	3.0178	0.440006	8.09934	0	0	7.80284	7.48227	10.7366	10.5841	3.0178	8.09934	0.00344083	AK000490	DEP domain containing 1	DEPDC1	NM_001114120 /// NM_017779	0007165 // signal transduction // inferred from electronic annotation	0005622 // intracellular // inferred from electronic annotation /// 0005634 // nucleus // inferred from electronic annotation	0005096 // GTPase activator activity // inferred from electronic annotation	---
203764_at	DLGAP5	9.81529	3.01325	0.306995	8.0738	0	0.0335481	7.31927	7.27835	10.3515	10.2726	3.01325	8.0738	0.00021771	NM_014750	discs, large (Drosophila) homolog-associated protein 5	DLGAP5	NM_001146015 /// NM_014750	0000087 // M phase of mitotic cell cycle // inferred from direct assay /// 0000087 // M phase of mitotic cell cycle // inferred from sequence or structural similarity /// 0007049 // cell cycle // inferred from electronic annotation /// 0007079 // mitotic chromosome movement towards spindle pole // non-traceable author statement /// 0007267 // cell-cell signaling // inferred from electronic annota…	0005634 // nucleus // inferred from direct assay /// 0005634 // nucleus // inferred from electronic annotation /// 0005634 // nucleus // inferred from sequence or structural similarity /// 0005737 // cytoplasm // inferred from electronic annotation /// 0005819 // spindle // inferred from electronic annotation /// 0005856 // cytoskeleton // inferred from electronic annotation /// 0031616 // spindl…	0004721 // phosphoprotein phosphatase activity // inferred from direct assay /// 0004721 // phosphoprotein phosphatase activity // inferred from sequence or structural similarity /// 0005515 // protein binding // inferred from physical interaction	---
227061_at	LOC100506621	8.7973	3.00289	0.341342	8.01605	0	0	7.14653	7.18769	10.2461	10.0939	3.00289	8.01605	0.000688159	AI088063	hypothetical LOC100506621	LOC100506621	XR_108466 /// XR_112518 /// XR_113576	---	---	---	---
202870_s_at	CDC20	9.36372	2.97832	0.31807	7.88068	0	0	9.14295	9.25394	12.1746	12.179	2.97832	7.88068	0.000347602	NM_001255	cell division cycle 20 homolog (S. cerevisiae)	CDC20	NM_001255	0006511 // ubiquitin-dependent protein catabolic process // traceable author statement /// 0007049 // cell cycle // inferred from electronic annotation /// 0007049 // cell cycle // traceable author statement /// 0007067 // mitosis // inferred from electronic annotation /// 0008284 // positive regulation of cell proliferation // inferred from electronic annotation /// 0031145 // anaphase-promoting…	0005654 // nucleoplasm // not recorded /// 0005813 // centrosome // inferred from electronic annotation /// 0005819 // spindle // traceable author statement /// 0005829 // cytosol // not recorded /// 0043234 // protein complex // inferred from electronic annotation /// 0048471 // perinuclear region of cytoplasm // inferred from electronic annotation	0005515 // protein binding // inferred from physical interaction /// 0005515 // protein binding // inferred from electronic annotation /// 0008022 // protein C-terminus binding // inferred from physical interaction /// 0019899 // enzyme binding // inferred from physical interaction	Cell_cycle_KEGG // GenMAPP
1559965_at	LOC100192378	8.11823	2.69769	0.3323	6.48761	0	0	5.85175	5.87256	8.62883	8.49085	2.69769	6.48761	0.000668268	BC037827	hypothetical LOC100192378	LOC100192378	NR_024360	---	---	---	---
219773_at	NOX4	5.36468	2.69751	0.502827	6.4868	0	0	7.19873	7.22608	10.1498	9.67	2.69751	6.4868	0.00784242	NM_016931	NADPH oxidase 4	NOX4	NM_001143836 /// NM_001143837 /// NM_016931 /// NR_026571	0000902 // cell morphogenesis // inferred from sequence or structural similarity /// 0000902 // cell morphogenesis // inferred from electronic annotation /// 0006800 // oxygen and reactive oxygen species metabolic process // inferred from direct assay /// 0006954 // inflammatory response // traceable author statement /// 0007569 // cell aging // inferred from sequence or structural similarity ///…	0005634 // nucleus // inferred from electronic annotation /// 0005783 // endoplasmic reticulum // inferred from electronic annotation /// 0005789 // endoplasmic reticulum membrane // inferred from electronic annotation /// 0005886 // plasma membrane // inferred from electronic annotation /// 0005925 // focal adhesion // inferred from electronic annotation /// 0016020 // membrane // inferred from …	0000166 // nucleotide binding // traceable author statement /// 0005506 // iron ion binding // inferred from electronic annotation /// 0009055 // electron carrier activity // traceable author statement /// 0009055 // electron carrier activity // inferred from electronic annotation /// 0016174 // NAD(P)H oxidase activity // traceable author statement /// 0016175 // superoxide-generating NADPH oxid…	---
207165_at	HMMR	5.01735	2.62602	0.523388	6.17321	0	0	8.33089	8.06004	11.0444	10.5985	2.62602	6.17321	0.00972413	NM_012485	hyaluronan-mediated motility receptor (RHAMM)	HMMR	NM_001142556 /// NM_001142557 /// NM_012484 /// NM_012485	---	0005737 // cytoplasm // inferred from electronic annotation /// 0009986 // cell surface // inferred from electronic annotation	0004872 // receptor activity // inferred from electronic annotation /// 0005540 // hyaluronic acid binding // inferred from electronic annotation	---
222802_at	EDN1	5.20972	2.59881	0.498838	6.05786	0	0	7.62721	7.90955	10.5567	10.1777	2.59881	6.05786	0.00816718	J05008	endothelin 1	EDN1	NM_001168319 /// NM_001955	0001501 // skeletal system development // inferred from electronic annotation /// 0001516 // prostaglandin biosynthetic process // inferred from direct assay /// 0001569 // patterning of blood vessels // inferred from electronic annotation /// 0001666 // response to hypoxia // inferred from electronic annotation /// 0001701 // in utero embryonic development // inferred from electronic annotation …	0005576 // extracellular region // not recorded /// 0005576 // extracellular region // inferred from electronic annotation /// 0005615 // extracellular space // inferred from direct assay /// 0005615 // extracellular space // inferred from electronic annotation /// 0005737 // cytoplasm // inferred from direct assay	0005102 // receptor binding // inferred from electronic annotation /// 0005179 // hormone activity // inferred from direct assay /// 0005515 // protein binding // inferred from electronic annotation /// 0031707 // endothelin A receptor binding // inferred from direct assay /// 0031707 // endothelin A receptor binding // inferred from electronic annotation /// 0031708 // endothelin B receptor bind…	Prostaglandin_synthesis_regulation // GenMAPP
235545_at	DEPDC1	5.2882	2.5803	0.487936	5.98066	0	0	7.11764	6.76367	9.66055	9.38137	2.5803	5.98066	0.00754508	AI810054	DEP domain containing 1	DEPDC1	NM_001114120 /// NM_017779	0007165 // signal transduction // inferred from electronic annotation	0005622 // intracellular // inferred from electronic annotation /// 0005634 // nucleus // inferred from electronic annotation	0005096 // GTPase activator activity // inferred from electronic annotation	---
218542_at	CEP55	4.60104	2.5785	0.560418	5.9732	0	0	7.67296	7.62824	10.5261	9.93205	2.5785	5.9732	0.0130854	NM_018131	centrosomal protein 55kDa	CEP55	NM_001127182 /// NM_018131	0007049 // cell cycle // inferred from electronic annotation /// 0007067 // mitosis // inferred from electronic annotation /// 0051301 // cell division // inferred from electronic annotation	0005737 // cytoplasm // inferred from electronic annotation /// 0005814 // centriole // inferred from electronic annotation /// 0005815 // microtubule organizing center // inferred from electronic annotation /// 0005856 // cytoskeleton // inferred from electronic annotation	---	---
209373_at	MALL	8.46073	2.54898	0.301272	5.85221	0	0	7.04265	6.98785	9.59163	9.53684	2.54898	5.85221	0.00023096	BC003179	mal, T-cell differentiation protein-like	MALL	NM_005434	0042632 // cholesterol homeostasis // non-traceable author statement	0000139 // Golgi membrane // inferred from direct assay /// 0005886 // plasma membrane // inferred from direct assay /// 0016020 // membrane // inferred from electronic annotation /// 0016021 // integral to membrane // non-traceable author statement /// 0016021 // integral to membrane // inferred from electronic annotation /// 0016023 // cytoplasmic membrane-bounded vesicle // inferred from direc…	0005515 // protein binding // inferred from physical interaction	---
220295_x_at	DEPDC1	3.82054	2.51928	0.659403	5.73295	0	1.39034	6.27747	6.21997	9.16383	8.37216	2.51928	5.73295	0.0239302	NM_017779	DEP domain containing 1	DEPDC1	NM_001114120 /// NM_017779	0007165 // signal transduction // inferred from electronic annotation	0005622 // intracellular // inferred from electronic annotation /// 0005634 // nucleus // inferred from electronic annotation	0005096 // GTPase activator activity // inferred from electronic annotation	---
218803_at	CHFR	4.79796	2.51132	0.523414	5.70141	0	0	5.57729	5.06061	7.86663	7.79391	2.51132	5.70141	0.0106204	NM_018223	checkpoint with forkhead and ring finger domains	CHFR	NM_001161344 /// NM_001161345 /// NM_001161346 /// NM_001161347 /// NM_018223	0000209 // protein polyubiquitination // inferred from direct assay /// 0000209 // protein polyubiquitination // inferred from electronic annotation /// 0000278 // mitotic cell cycle // inferred from electronic annotation /// 0006350 // transcription // inferred from electronic annotation /// 0006355 // regulation of transcription, DNA-dependent // inferred from electronic annotation /// 0006511 …	0005622 // intracellular // inferred from electronic annotation /// 0005634 // nucleus // inferred from direct assay /// 0005634 // nucleus // inferred from electronic annotation /// 0016605 // PML body // inferred from direct assay	0000166 // nucleotide binding // inferred from direct assay /// 0003676 // nucleic acid binding // inferred from electronic annotation /// 0003677 // DNA binding // inferred from electronic annotation /// 0004842 // ubiquitin-protein ligase activity // inferred from direct assay /// 0004842 // ubiquitin-protein ligase activity // inferred from electronic annotation /// 0005515 // protein binding …	---
206385_s_at	ANK3	7.32725	2.44153	0.333212	5.43216	0	0	6.50022	6.64131	9.0079	9.01668	2.44153	5.43216	0.000837102	NM_020987	ankyrin 3, node of Ranvier (ankyrin G)	ANK3	NM_001149 /// NM_020987	0007016 // cytoskeletal anchoring at plasma membrane // traceable author statement /// 0007165 // signal transduction // inferred from electronic annotation /// 0007411 // axon guidance // inferred from electronic annotation /// 0045184 // establishment of protein localization // inferred from mutant phenotype /// 0050808 // synapse organization // inferred from electronic annotation	0005624 // membrane fraction // inferred from electronic annotation /// 0005737 // cytoplasm // inferred from electronic annotation /// 0005783 // endoplasmic reticulum // traceable author statement /// 0005794 // Golgi apparatus // traceable author statement /// 0005856 // cytoskeleton // inferred from electronic annotation /// 0016323 // basolateral plasma membrane // inferred from direct assay…	0005515 // protein binding // inferred from physical interaction /// 0005515 // protein binding // inferred from electronic annotation	---
224209_s_at	GDA	7.63474	2.42482	0.317604	5.36964	0	0	6.46819	6.5281	8.87675	8.96919	2.42483	5.36964	0.000515513	AF019638	guanine deaminase	GDA	NM_004293	0006139 // nucleobase, nucleoside, nucleotide and nucleic acid metabolic process // traceable author statement /// 0007399 // nervous system development // traceable author statement	0005622 // intracellular // traceable author statement	0005515 // protein binding // inferred from electronic annotation /// 0008270 // zinc ion binding // inferred from electronic annotation /// 0008270 // zinc ion binding // traceable author statement /// 0008892 // guanine deaminase activity // inferred from electronic annotation /// 0008892 // guanine deaminase activity // traceable author statement /// 0016787 // hydrolase activity // inferred f…	---
1569190_at	SCLT1	5.65701	2.42303	0.428323	5.36295	0	0	6.36238	6.26224	8.89339	8.57728	2.42303	5.36295	0.00464933	BC014677	sodium channel and clathrin linker 1	SCLT1	NM_144643	0045162 // clustering of voltage-gated sodium channels // inferred from electronic annotation	0005737 // cytoplasm // inferred from electronic annotation /// 0005886 // plasma membrane // inferred from electronic annotation	0017080 // sodium channel regulator activity // inferred from electronic annotation	---
205541_s_at	GSPT2	3.47585	2.42064	0.696416	5.35409	0	3.18272	4.91289	4.81508	7.71575	6.8535	2.42064	5.35409	0.030659	NM_018094	G1 to S phase transition 2	GSPT2	NM_018094	0006412 // translation // inferred from electronic annotation /// 0007049 // cell cycle // inferred from electronic annotation	0005737 // cytoplasm // inferred from electronic annotation	0000166 // nucleotide binding // inferred from electronic annotation /// 0003924 // GTPase activity // inferred from electronic annotation /// 0005515 // protein binding // inferred from physical interaction /// 0005525 // GTP binding // inferred from electronic annotation	Translation_Factors // GenMAPP
209990_s_at	GABBR2	4.48025	2.41273	0.538525	5.3248	0	0	7.85574	7.93316	10.5805	10.0339	2.41273	5.3248	0.0128343	AF056085	gamma-aminobutyric acid (GABA) B receptor, 2	GABBR2	NM_005458	0007165 // signal transduction // inferred from electronic annotation /// 0007186 // G-protein coupled receptor protein signaling pathway // traceable author statement /// 0007186 // G-protein coupled receptor protein signaling pathway // inferred from electronic annotation /// 0007194 // negative regulation of adenylate cyclase activity // traceable author statement /// 0007214 // gamma-aminobut…	0005737 // cytoplasm // inferred from electronic annotation /// 0005886 // plasma membrane // not recorded /// 0005886 // plasma membrane // inferred from electronic annotation /// 0005887 // integral to plasma membrane // traceable author statement /// 0016020 // membrane // inferred from electronic annotation /// 0016021 // integral to membrane // inferred from electronic annotation /// 0030054…	0004871 // signal transducer activity // inferred from electronic annotation /// 0004872 // receptor activity // inferred from electronic annotation /// 0004930 // G-protein coupled receptor activity // inferred from electronic annotation /// 0004965 // GABA-B receptor activity // inferred from electronic annotation /// 0004965 // GABA-B receptor activity // traceable author statement /// 0005515…	GPCRDB_Class_C_Metabotropic_glutamate_pheromone // GenMAPP
206172_at	IL13RA2	8.41142	2.39215	0.284393	5.2494	0	0	8.99889	8.97924	11.4008	11.3617	2.39215	5.2494	8.35415e-05	NM_000640	interleukin 13 receptor, alpha 2	IL13RA2	NM_000640	---	0005615 // extracellular space // traceable author statement /// 0005625 // soluble fraction // traceable author statement /// 0016020 // membrane // inferred from electronic annotation /// 0016021 // integral to membrane // inferred from electronic annotation	0004871 // signal transducer activity // traceable author statement /// 0004872 // receptor activity // inferred from electronic annotation /// 0004896 // cytokine receptor activity // traceable author statement /// 0004896 // cytokine receptor activity // inferred from electronic annotation	---
209709_s_at	HMMR	4.29804	2.37142	0.551744	5.17449	0	0	7.40728	7.29687	10.0074	9.43959	2.37142	5.17449	0.0145502	U29343	hyaluronan-mediated motility receptor (RHAMM)	HMMR	NM_001142556 /// NM_001142557 /// NM_012484 /// NM_012485	---	0005737 // cytoplasm // inferred from electronic annotation /// 0009986 // cell surface // inferred from electronic annotation	0004872 // receptor activity // inferred from electronic annotation /// 0005540 // hyaluronic acid binding // inferred from electronic annotation	---
209642_at	BUB1	4.85869	2.35501	0.4847	5.11597	0	0	7.48118	7.38452	10.0047	9.571	2.35501	5.11597	0.00878303	AF043294	budding uninhibited by benzimidazoles 1 homolog (yeast)	BUB1	NM_004336	0006468 // protein phosphorylation // inferred from electronic annotation /// 0006915 // apoptosis // inferred from electronic annotation /// 0007049 // cell cycle // inferred from electronic annotation /// 0007059 // chromosome segregation // inferred from electronic annotation /// 0007063 // regulation of sister chromatid cohesion // inferred from direct assay /// 0007067 // mitosis // inferred…	0000775 // chromosome, centromeric region // inferred from electronic annotation /// 0000776 // kinetochore // inferred from direct assay /// 0000776 // kinetochore // inferred from electronic annotation /// 0000776 // kinetochore // traceable author statement /// 0000777 // condensed chromosome kinetochore // inferred from direct assay /// 0000777 // condensed chromosome kinetochore // inferred …	0000166 // nucleotide binding // inferred from electronic annotation /// 0004672 // protein kinase activity // traceable author statement /// 0004672 // protein kinase activity // inferred from electronic annotation /// 0004674 // protein serine/threonine kinase activity // inferred from electronic annotation /// 0005515 // protein binding // inferred from physical interaction /// 0005524 // ATP …	Cell_cycle_KEGG // GenMAPP
228729_at	CCNB1	5.80885	2.33066	0.401226	5.03036	0	0	7.56925	7.67436	10.0808	9.82411	2.33066	5.03036	0.00352278	N90191	cyclin B1	CCNB1	NM_031966	0000086 // G2/M transition of mitotic cell cycle // non-traceable author statement /// 0000236 // mitotic prometaphase // inferred from direct assay /// 0000278 // mitotic cell cycle // inferred from electronic annotation /// 0001556 // oocyte maturation // inferred from electronic annotation /// 0001701 // in utero embryonic development // inferred from electronic annotation /// 0001933 // negat…	0000922 // spindle pole // inferred from direct assay /// 0000942 // condensed nuclear chromosome outer kinetochore // inferred from direct assay /// 0005624 // membrane fraction // inferred from electronic annotation /// 0005625 // soluble fraction // inferred from electronic annotation /// 0005634 // nucleus // inferred from direct assay /// 0005634 // nucleus // inferred from electronic annota…	0005515 // protein binding // inferred from physical interaction /// 0005515 // protein binding // inferred from electronic annotation /// 0016301 // kinase activity // inferred from electronic annotation /// 0019901 // protein kinase binding // inferred from electronic annotation /// 0032403 // protein complex binding // inferred from electronic annotation /// 0035173 // histone kinase activity …	Cell_cycle_KEGG // GenMAPP /// G1_to_S_cell_cycle_Reactome // GenMAPP
221520_s_at	CDCA8	6.68577	2.30437	0.344668	4.93953	0	0	8.22018	8.31964	10.5089	10.6397	2.30437	4.93953	0.00126819	BC001651	cell division cycle associated 8	CDCA8	NM_018101	0000089 // mitotic metaphase // inferred from mutant phenotype /// 0007049 // cell cycle // inferred from electronic annotation /// 0007067 // mitosis // inferred from electronic annotation /// 0051276 // chromosome organization // inferred from mutant phenotype /// 0051301 // cell division // inferred from electronic annotation	0000775 // chromosome, centromeric region // inferred from direct assay /// 0000775 // chromosome, centromeric region // inferred from electronic annotation /// 0005634 // nucleus // inferred from electronic annotation /// 0005730 // nucleolus // inferred from electronic annotation /// 0005737 // cytoplasm // inferred from electronic annotation /// 0005819 // spindle // inferred from electronic a…	0005515 // protein binding // inferred from physical interaction	---
204641_at	NEK2	4.30327	2.28649	0.531339	4.87868	0	0	7.25059	7.06906	9.69934	9.19329	2.28649	4.87868	0.0135414	NM_002497	NIMA (never in mitosis gene a)-related kinase 2	NEK2	NM_002497	0000070 // mitotic sister chromatid segregation // inferred from electronic annotation /// 0006468 // protein phosphorylation // inferred from electronic annotation /// 0007049 // cell cycle // inferred from electronic annotation /// 0007059 // chromosome segregation // inferred from direct assay /// 0007059 // chromosome segregation // inferred from electronic annotation /// 0007067 // mitosis /…	0000775 // chromosome, centromeric region // inferred from electronic annotation /// 0000776 // kinetochore // inferred from direct assay /// 0000776 // kinetochore // inferred from electronic annotation /// 0000777 // condensed chromosome kinetochore // inferred from electronic annotation /// 0000794 // condensed nuclear chromosome // inferred from electronic annotation /// 0000922 // spindle po…	0000166 // nucleotide binding // inferred from electronic annotation /// 0004672 // protein kinase activity // inferred from direct assay /// 0004672 // protein kinase activity // inferred from electronic annotation /// 0004674 // protein serine/threonine kinase activity // inferred from electronic annotation /// 0004674 // protein serine/threonine kinase activity // traceable author statement //…	---
225687_at	FAM83D	6.15267	2.28205	0.370903	4.86367	0	0	9.06328	9.02985	11.4357	11.2215	2.28204	4.86367	0.00224777	BC001068	family with sequence similarity 83, member D	FAM83D	NM_030919	0007049 // cell cycle // inferred from electronic annotation /// 0007067 // mitosis // inferred from electronic annotation /// 0051301 // cell division // inferred from electronic annotation	0000922 // spindle pole // inferred from electronic annotation /// 0005737 // cytoplasm // inferred from electronic annotation /// 0005819 // spindle // inferred from electronic annotation /// 0005856 // cytoskeleton // inferred from electronic annotation	---	---
210559_s_at	CDK1	7.36627	2.25377	0.305957	4.76927	0	0	8.76653	8.76653	10.9769	11.0637	2.25377	4.76927	0.000371125	D88357	cyclin-dependent kinase 1	CDK1	NM_001170406 /// NM_001170407 /// NM_001786 /// NM_033379	0000278 // mitotic cell cycle // inferred from electronic annotation /// 0006461 // protein complex assembly // inferred from electronic annotation /// 0006468 // protein phosphorylation // inferred from electronic annotation /// 0006916 // anti-apoptosis // inferred from direct assay /// 0007049 // cell cycle // inferred from electronic annotation /// 0007067 // mitosis // inferred from electron…	0005634 // nucleus // inferred from direct assay /// 0005634 // nucleus // inferred from electronic annotation /// 0005634 // nucleus // traceable author statement /// 0005654 // nucleoplasm // not recorded /// 0005737 // cytoplasm // inferred from electronic annotation /// 0005829 // cytosol // not recorded /// 0005876 // spindle microtubule // inferred from direct assay /// 0030496 // midbody /…	0000166 // nucleotide binding // inferred from electronic annotation /// 0004672 // protein kinase activity // non-traceable author statement /// 0004672 // protein kinase activity // inferred from electronic annotation /// 0004674 // protein serine/threonine kinase activity // inferred from electronic annotation /// 0004693 // cyclin-dependent protein kinase activity // not recorded /// 0004693 …	Cell_cycle_KEGG // GenMAPP
208079_s_at	AURKA	7.7334	2.2395	0.289588	4.72233	0	0	9.28183	9.32594	11.5277	11.5591	2.2395	4.72233	0.000145972	NM_003158	aurora kinase A	AURKA	NM_003600 /// NM_198433 /// NM_198434 /// NM_198435 /// NM_198436 /// NM_198437	0000278 // mitotic cell cycle // inferred from electronic annotation /// 0006468 // protein phosphorylation // inferred from electronic annotation /// 0006468 // protein phosphorylation // traceable author statement /// 0007049 // cell cycle // non-traceable author statement /// 0007049 // cell cycle // inferred from electronic annotation /// 0007051 // spindle organization // non-traceable autho…	0000922 // spindle pole // inferred from electronic annotation /// 0005634 // nucleus // traceable author statement /// 0005737 // cytoplasm // inferred from electronic annotation /// 0005813 // centrosome // inferred from electronic annotation /// 0005815 // microtubule organizing center // inferred from electronic annotation /// 0005819 // spindle // traceable author statement /// 0005819 // sp…	0000166 // nucleotide binding // inferred from electronic annotation /// 0004672 // protein kinase activity // inferred from direct assay /// 0004672 // protein kinase activity // inferred from electronic annotation /// 0004674 // protein serine/threonine kinase activity // inferred from electronic annotation /// 0005515 // protein binding // inferred from physical interaction /// 0005515 // prot…	---
1555673_at	LOC730755	4.49938	2.19737	0.488372	4.58643	0	0	6.42586	6.20366	8.3155	8.70876	2.19737	4.58643	0.0103991	BC012486	keratin associated protein 2-4-like	LOC730755	NM_001165252	---	0005882 // intermediate filament // inferred from electronic annotation /// 0045095 // keratin filament // inferred from electronic annotation	---	---
219918_s_at	ASPM	4.50825	2.19582	0.487068	4.58151	0	0	7.14183	7.12511	9.55368	9.10491	2.19582	4.58151	0.0102955	NM_018123	asp (abnormal spindle) homolog, microcephaly associated (Drosophila)	ASPM	NM_018136	0007049 // cell cycle // inferred from electronic annotation /// 0007067 // mitosis // inferred from electronic annotation /// 0021873 // forebrain neuroblast division // inferred from electronic annotation /// 0045665 // negative regulation of neuron differentiation // inferred from electronic annotation /// 0045769 // negative regulation of asymmetric cell division // inferred from electronic a…	0000922 // spindle pole // inferred from electronic annotation /// 0005634 // nucleus // inferred from electronic annotation /// 0005737 // cytoplasm // inferred from electronic annotation	0005488 // binding // inferred from electronic annotation /// 0005516 // calmodulin binding // inferred from electronic annotation	---
209408_at	KIF2C	7.82488	2.19372	0.280352	4.57485	0	0	9.22697	9.19176	11.4059	11.4003	2.19372	4.57485	6.60164e-05	U63743	kinesin family member 2C	KIF2C	NM_006845	0007018 // microtubule-based movement // inferred from electronic annotation /// 0007019 // microtubule depolymerization // inferred from mutant phenotype /// 0007049 // cell cycle // inferred from electronic annotation /// 0007059 // chromosome segregation // inferred from electronic annotation /// 0007067 // mitosis // inferred from electronic annotation /// 0007067 // mitosis // traceable auth…	0000775 // chromosome, centromeric region // inferred from direct assay /// 0000775 // chromosome, centromeric region // inferred from electronic annotation /// 0000776 // kinetochore // inferred from direct assay /// 0000776 // kinetochore // inferred from electronic annotation /// 0000777 // condensed chromosome kinetochore // inferred from electronic annotation /// 0005634 // nucleus // inferr…	0000166 // nucleotide binding // inferred from electronic annotation /// 0003774 // motor activity // inferred from electronic annotation /// 0003777 // microtubule motor activity // inferred from electronic annotation /// 0003777 // microtubule motor activity // traceable author statement /// 0005515 // protein binding // inferred from physical interaction /// 0005524 // ATP binding // inferred …	---
203213_at	CDK1	5.31625	2.19006	0.411956	4.56324	0	0	9.76603	9.48043	11.8573	11.7693	2.19006	4.56324	0.00462312	AL524035	cyclin-dependent kinase 1	CDK1	NM_001170406 /// NM_001170407 /// NM_001786 /// NM_033379	0000278 // mitotic cell cycle // inferred from electronic annotation /// 0006461 // protein complex assembly // inferred from electronic annotation /// 0006468 // protein phosphorylation // inferred from electronic annotation /// 0006916 // anti-apoptosis // inferred from direct assay /// 0007049 // cell cycle // inferred from electronic annotation /// 0007067 // mitosis // inferred from electron…	0005634 // nucleus // inferred from direct assay /// 0005634 // nucleus // inferred from electronic annotation /// 0005634 // nucleus // traceable author statement /// 0005654 // nucleoplasm // not recorded /// 0005737 // cytoplasm // inferred from electronic annotation /// 0005829 // cytosol // not recorded /// 0005876 // spindle microtubule // inferred from direct assay /// 0030496 // midbody /…	0000166 // nucleotide binding // inferred from electronic annotation /// 0004672 // protein kinase activity // non-traceable author statement /// 0004672 // protein kinase activity // inferred from electronic annotation /// 0004674 // protein serine/threonine kinase activity // inferred from electronic annotation /// 0004693 // cyclin-dependent protein kinase activity // not recorded /// 0004693 …	Cell_cycle_KEGG // GenMAPP
236641_at	KIF14	2.19758	2.18937	0.996261	4.56106	0.0523603	15.128	6.07669	5.07563	8.30203	7.22902	2.18937	4.56106	0.0963559	AW183154	kinesin family member 14	KIF14	NM_014875	0007018 // microtubule-based movement // inferred from electronic annotation	0005634 // nucleus // inferred from electronic annotation /// 0005737 // cytoplasm // inferred from electronic annotation /// 0005819 // spindle // inferred from electronic annotation /// 0005856 // cytoskeleton // inferred from electronic annotation /// 0005874 // microtubule // inferred from electronic annotation	0000166 // nucleotide binding // inferred from electronic annotation /// 0003774 // motor activity // inferred from electronic annotation /// 0003777 // microtubule motor activity // inferred from electronic annotation /// 0005515 // protein binding // inferred from physical interaction /// 0005524 // ATP binding // inferred from electronic annotation	---
211519_s_at	KIF2C	6.05015	2.17726	0.359869	4.52293	0	0	8.3034	8.3328	10.5916	10.3991	2.17726	4.52293	0.00199285	AY026505	kinesin family member 2C	KIF2C	NM_006845	0007018 // microtubule-based movement // inferred from electronic annotation /// 0007019 // microtubule depolymerization // inferred from mutant phenotype /// 0007049 // cell cycle // inferred from electronic annotation /// 0007059 // chromosome segregation // inferred from electronic annotation /// 0007067 // mitosis // inferred from electronic annotation /// 0007067 // mitosis // traceable auth…	0000775 // chromosome, centromeric region // inferred from direct assay /// 0000775 // chromosome, centromeric region // inferred from electronic annotation /// 0000776 // kinetochore // inferred from direct assay /// 0000776 // kinetochore // inferred from electronic annotation /// 0000777 // condensed chromosome kinetochore // inferred from electronic annotation /// 0005634 // nucleus // inferr…	0000166 // nucleotide binding // inferred from electronic annotation /// 0003774 // motor activity // inferred from electronic annotation /// 0003777 // microtubule motor activity // inferred from electronic annotation /// 0003777 // microtubule motor activity // traceable author statement /// 0005515 // protein binding // inferred from physical interaction /// 0005524 // ATP binding // inferred …	---
222608_s_at	ANLN	4.60545	2.17702	0.472705	4.52218	0	0	8.94642	8.87416	11.2944	10.8803	2.17702	4.52218	0.00919239	AK023208	anillin, actin binding protein	ANLN	NM_018685	0000910 // cytokinesis // inferred from direct assay /// 0000921 // septin ring assembly // traceable author statement /// 0007049 // cell cycle // inferred from electronic annotation /// 0007067 // mitosis // inferred from electronic annotation /// 0007096 // regulation of exit from mitosis // traceable author statement /// 0051301 // cell division // inferred from electronic annotation	0005634 // nucleus // inferred from electronic annotation /// 0005737 // cytoplasm // inferred from electronic annotation /// 0005826 // actomyosin contractile ring // inferred from direct assay /// 0005856 // cytoskeleton // inferred from electronic annotation /// 0005938 // cell cortex // inferred from electronic annotation /// 0015629 // actin cytoskeleton // inferred from direct assay	0003779 // actin binding // inferred from direct assay /// 0003779 // actin binding // inferred from electronic annotation /// 0003779 // actin binding // traceable author statement /// 0005515 // protein binding // inferred from physical interaction /// 0005515 // protein binding // inferred from electronic annotation	---
209763_at	CHRDL1	4.89514	2.1714	0.443584	4.50461	0	0	7.59806	7.54865	9.92413	9.5654	2.1714	4.50461	0.00688091	AL049176	chordin-like 1	CHRDL1	NM_001143981 /// NM_001143982 /// NM_001143983 /// NM_145234	0001503 // ossification // inferred from electronic annotation /// 0001709 // cell fate determination // inferred from electronic annotation /// 0007275 // multicellular organismal development // inferred from electronic annotation /// 0007399 // nervous system development // inferred from electronic annotation /// 0030154 // cell differentiation // inferred from electronic annotation /// 0030182…	0005576 // extracellular region // not recorded /// 0005576 // extracellular region // inferred from electronic annotation	---	---
244519_at	ASXL1	4.29845	2.16829	0.504436	4.49491	0	0	6.23376	6.71743	8.65	8.63777	2.16829	4.49491	0.0122194	AI829840	additional sex combs like 1 (Drosophila)	ASXL1	NM_001164603 /// NM_015338	0006350 // transcription // inferred from electronic annotation /// 0016568 // chromatin modification // inferred from electronic annotation /// 0045449 // regulation of transcription // inferred from electronic annotation	0005634 // nucleus // inferred from electronic annotation /// 0035517 // PR-DUB complex // inferred from direct assay	0005515 // protein binding // inferred from physical interaction /// 0046872 // metal ion binding // inferred from electronic annotation	---
214218_s_at	XIST	4.97267	2.16469	0.435316	4.48369	0	0	4.96467	4.91511	7.27558	6.93357	2.16469	4.48369	0.00631125	AV699347	X (inactive)-specific transcript (non-protein coding)	XIST	NR_001564	---	---	---	---
203214_x_at	CDK1	7.3551	2.1488	0.292151	4.43458	0	0	8.40215	8.35166	10.5412	10.5102	2.1488	4.43458	0.000189997	NM_001786	cyclin-dependent kinase 1	CDK1	NM_001170406 /// NM_001170407 /// NM_001786 /// NM_033379	0000278 // mitotic cell cycle // inferred from electronic annotation /// 0006461 // protein complex assembly // inferred from electronic annotation /// 0006468 // protein phosphorylation // inferred from electronic annotation /// 0006916 // anti-apoptosis // inferred from direct assay /// 0007049 // cell cycle // inferred from electronic annotation /// 0007067 // mitosis // inferred from electron…	0005634 // nucleus // inferred from direct assay /// 0005634 // nucleus // inferred from electronic annotation /// 0005634 // nucleus // traceable author statement /// 0005654 // nucleoplasm // not recorded /// 0005737 // cytoplasm // inferred from electronic annotation /// 0005829 // cytosol // not recorded /// 0005876 // spindle microtubule // inferred from direct assay /// 0030496 // midbody /…	0000166 // nucleotide binding // inferred from electronic annotation /// 0004672 // protein kinase activity // non-traceable author statement /// 0004672 // protein kinase activity // inferred from electronic annotation /// 0004674 // protein serine/threonine kinase activity // inferred from electronic annotation /// 0004693 // cyclin-dependent protein kinase activity // not recorded /// 0004693 …	Cell_cycle_KEGG // GenMAPP
203418_at	CCNA2	5.40845	2.1487	0.397285	4.43427	0	0	8.41758	8.40282	10.6935	10.4243	2.1487	4.43427	0.00391021	NM_001237	cyclin A2	CCNA2	NM_001237	0007049 // cell cycle // inferred from electronic annotation /// 0007067 // mitosis // inferred from electronic annotation /// 0007095 // mitotic cell cycle G2/M transition DNA damage checkpoint // traceable author statement /// 0007265 // Ras protein signal transduction // inferred from expression pattern /// 0031100 // organ regeneration // inferred from electronic annotation /// 0032355 // res…	0001939 // female pronucleus // inferred from electronic annotation /// 0001940 // male pronucleus // inferred from electronic annotation /// 0005634 // nucleus // inferred from direct assay /// 0005634 // nucleus // inferred from electronic annotation /// 0005654 // nucleoplasm // not recorded /// 0005737 // cytoplasm // inferred from electronic annotation	0005515 // protein binding // inferred from physical interaction	Cell_cycle_KEGG // GenMAPP
209891_at	SPC25	6.45922	2.11897	0.328054	4.34385	0	0	7.23301	7.12339	9.33308	9.26126	2.11897	4.34385	0.000954913	AF225416	SPC25, NDC80 kinetochore complex component, homolog (S. cerevisiae)	SPC25	NM_020675	0007049 // cell cycle // inferred from electronic annotation /// 0007052 // mitotic spindle organization // inferred from mutant phenotype /// 0007059 // chromosome segregation // inferred from mutant phenotype /// 0007067 // mitosis // inferred from electronic annotation /// 0051301 // cell division // inferred from electronic annotation	0000775 // chromosome, centromeric region // inferred from electronic annotation /// 0000776 // kinetochore // inferred from electronic annotation /// 0000777 // condensed chromosome kinetochore // inferred from direct assay /// 0000777 // condensed chromosome kinetochore // inferred from electronic annotation /// 0005634 // nucleus // inferred from electronic annotation /// 0031262 // Ndc80 comp…	0005515 // protein binding // inferred from physical interaction	---
204318_s_at	GTSE1	3.66641	2.07534	0.56604	4.21443	0	2.12492	7.45687	7.35378	9.77977	9.18156	2.07534	4.21443	0.0207257	NM_016426	G-2 and S-phase expressed 1	GTSE1	NM_016426	0000085 // G2 phase of mitotic cell cycle // non-traceable author statement /// 0006977 // DNA damage response, signal transduction by p53 class mediator resulting in cell cycle arrest // non-traceable author statement /// 0007017 // microtubule-based process // non-traceable author statement	0005737 // cytoplasm // inferred from electronic annotation /// 0005874 // microtubule // inferred from electronic annotation /// 0005881 // cytoplasmic microtubule // non-traceable author statement	---	---
236075_s_at	LOC100506676	6.7077	2.05349	0.30614	4.1511	0	0	8.42188	8.4174	10.4296	10.5167	2.05349	4.1511	0.000450755	AI693543	hypothetical LOC100506676	LOC100506676	XR_109352 /// XR_109353 /// XR_109354 /// XR_111659 /// XR_111660 /// XR_111661 /// XR_115051 /// XR_115052 /// XR_115053	---	---	---	---
225241_at	CCDC80	6.0254	2.04792	0.339881	4.13509	0	0	8.47181	8.34274	10.4125	10.4978	2.04792	4.13509	0.00142365	AA570507	coiled-coil domain containing 80	CCDC80	NM_199511 /// NM_199512	0010811 // positive regulation of cell-substrate adhesion // inferred from electronic annotation /// 0030198 // extracellular matrix organization // inferred from electronic annotation	0005576 // extracellular region // inferred from electronic annotation /// 0005578 // proteinaceous extracellular matrix // inferred from electronic annotation /// 0005604 // basement membrane // inferred from electronic annotation /// 0005614 // interstitial matrix // inferred from electronic annotation /// 0019031 // viral envelope // inferred from electronic annotation /// 0031012 // extracell…	0001968 // fibronectin binding // inferred from electronic annotation /// 0005539 // glycosaminoglycan binding // inferred from electronic annotation /// 0008201 // heparin binding // inferred from electronic annotation	---
226661_at	CDCA2	5.91629	2.0252	0.342309	4.07047	0	0	7.86722	7.79715	9.92905	9.7857	2.0252	4.07047	0.00154831	T90295	cell division cycle associated 2	CDCA2	NM_152562	0007049 // cell cycle // inferred from electronic annotation /// 0007067 // mitosis // inferred from electronic annotation /// 0051301 // cell division // inferred from electronic annotation	0005634 // nucleus // inferred from electronic annotation	---	---
204159_at	CDKN2C	4.037	2.01724	0.499689	4.0481	0	0.52847	7.11552	7.19252	9.40527	8.93724	2.01724	4.0481	0.0135419	NM_001262	cyclin-dependent kinase inhibitor 2C (p18, inhibits CDK4)	CDKN2C	NM_001262 /// NM_078626	0000079 // regulation of cyclin-dependent protein kinase activity // inferred from direct assay /// 0000082 // G1/S transition of mitotic cell cycle // inferred from direct assay /// 0006917 // induction of apoptosis // inferred from direct assay /// 0007049 // cell cycle // inferred from electronic annotation /// 0007050 // cell cycle arrest // inferred from direct assay /// 0008285 // negative …	0005634 // nucleus // inferred from direct assay /// 0005737 // cytoplasm // inferred from direct assay	0004861 // cyclin-dependent protein kinase inhibitor activity // inferred from direct assay /// 0005515 // protein binding // inferred from physical interaction /// 0016301 // kinase activity // inferred from electronic annotation /// 0019901 // protein kinase binding // inferred from physical interaction	G1_to_S_cell_cycle_Reactome // GenMAPP
238429_at	TMEM71	5.47604	2.00917	0.366902	4.0255	0	0	6.98645	7.19506	9.10366	9.09618	2.00917	4.0255	0.00268782	AI342543	transmembrane protein 71	TMEM71	NM_001145153 /// NM_144649	---	0016020 // membrane // inferred from electronic annotation /// 0016021 // integral to membrane // inferred from electronic annotation	---	---
225834_at	FAM72A /// FAM72B /// FAM72C /// FAM72D	3.9184	1.98957	0.507751	3.9712	0	0.977019	8.13261	8.04688	10.3208	9.83787	1.98957	3.9712	0.014854	AL135396	family with sequence similarity 72, member A /// family with sequence similarity 72, member B /// family with sequence similarity 72, member C /// family with sequence similarity 72, member D	FAM72A /// FAM72B /// FAM72C /// FAM72D	NM_001100910 /// NM_001123168 /// NM_207418	---	---	---	---
224588_at	XIST	3.33937	1.98655	0.594887	3.96289	0	4.04811	7.33086	6.72749	9.15519	8.87627	1.98655	3.96289	0.026868	AA167449	X (inactive)-specific transcript (non-protein coding)	XIST	NR_001564	---	---	---	---
201860_s_at	PLAT	3.88477	1.97863	0.50933	3.9412	0	1.11453	7.48197	7.74871	9.80164	9.38631	1.97863	3.9412	0.0152046	NM_000930	plasminogen activator, tissue	PLAT	NM_000930 /// NM_033011	0001666 // response to hypoxia // inferred from electronic annotation /// 0006464 // protein modification process // traceable author statement /// 0006508 // proteolysis // traceable author statement /// 0006508 // proteolysis // inferred from electronic annotation /// 0007596 // blood coagulation // traceable author statement /// 0014909 // smooth muscle cell migration // inferred from electron…	0005576 // extracellular region // not recorded /// 0005576 // extracellular region // inferred from electronic annotation /// 0005615 // extracellular space // inferred from electronic annotation /// 0005737 // cytoplasm // inferred from direct assay /// 0005737 // cytoplasm // inferred from electronic annotation /// 0009986 // cell surface // inferred from direct assay /// 0030141 // stored sec…	0003824 // catalytic activity // inferred from electronic annotation /// 0004252 // serine-type endopeptidase activity // not recorded /// 0004252 // serine-type endopeptidase activity // inferred from direct assay /// 0004252 // serine-type endopeptidase activity // inferred from electronic annotation /// 0005515 // protein binding // inferred from physical interaction /// 0008233 // peptidase a…	Blood_Clotting_Cascade // GenMAPP
1552619_a_at	ANLN	4.44098	1.96921	0.443419	3.91555	0	0	8.19594	8.45214	10.421	10.1655	1.96921	3.91555	0.00833287	NM_018685	anillin, actin binding protein	ANLN	NM_018685	0000910 // cytokinesis // inferred from direct assay /// 0000921 // septin ring assembly // traceable author statement /// 0007049 // cell cycle // inferred from electronic annotation /// 0007067 // mitosis // inferred from electronic annotation /// 0007096 // regulation of exit from mitosis // traceable author statement /// 0051301 // cell division // inferred from electronic annotation	0005634 // nucleus // inferred from electronic annotation /// 0005737 // cytoplasm // inferred from electronic annotation /// 0005826 // actomyosin contractile ring // inferred from direct assay /// 0005856 // cytoskeleton // inferred from electronic annotation /// 0005938 // cell cortex // inferred from electronic annotation /// 0015629 // actin cytoskeleton // inferred from direct assay	0003779 // actin binding // inferred from direct assay /// 0003779 // actin binding // inferred from electronic annotation /// 0003779 // actin binding // traceable author statement /// 0005515 // protein binding // inferred from physical interaction /// 0005515 // protein binding // inferred from electronic annotation	---
204092_s_at	AURKA	5.67706	1.9673	0.346536	3.91036	0	0	9.10884	9.27641	11.1661	11.1538	1.9673	3.91036	0.0018185	NM_003600	aurora kinase A	AURKA	NM_003600 /// NM_198433 /// NM_198434 /// NM_198435 /// NM_198436 /// NM_198437	0000278 // mitotic cell cycle // inferred from electronic annotation /// 0006468 // protein phosphorylation // inferred from electronic annotation /// 0006468 // protein phosphorylation // traceable author statement /// 0007049 // cell cycle // non-traceable author statement /// 0007049 // cell cycle // inferred from electronic annotation /// 0007051 // spindle organization // non-traceable autho…	0000922 // spindle pole // inferred from electronic annotation /// 0005634 // nucleus // traceable author statement /// 0005737 // cytoplasm // inferred from electronic annotation /// 0005813 // centrosome // inferred from electronic annotation /// 0005815 // microtubule organizing center // inferred from electronic annotation /// 0005819 // spindle // traceable author statement /// 0005819 // sp…	0000166 // nucleotide binding // inferred from electronic annotation /// 0004672 // protein kinase activity // inferred from direct assay /// 0004672 // protein kinase activity // inferred from electronic annotation /// 0004674 // protein serine/threonine kinase activity // inferred from electronic annotation /// 0005515 // protein binding // inferred from physical interaction /// 0005515 // prot…	---
243864_at	CCDC80	5.88838	1.95665	0.332291	3.88161	0	0	7.34616	7.23477	9.20511	9.28913	1.95665	3.88161	0.00126881	AA994712	coiled-coil domain containing 80	CCDC80	NM_199511 /// NM_199512	0010811 // positive regulation of cell-substrate adhesion // inferred from electronic annotation /// 0030198 // extracellular matrix organization // inferred from electronic annotation	0005576 // extracellular region // inferred from electronic annotation /// 0005578 // proteinaceous extracellular matrix // inferred from electronic annotation /// 0005604 // basement membrane // inferred from electronic annotation /// 0005614 // interstitial matrix // inferred from electronic annotation /// 0019031 // viral envelope // inferred from electronic annotation /// 0031012 // extracell…	0001968 // fibronectin binding // inferred from electronic annotation /// 0005539 // glycosaminoglycan binding // inferred from electronic annotation /// 0008201 // heparin binding // inferred from electronic annotation	---
217979_at	TSPAN13	4.59926	1.95386	0.424821	3.8741	0	0	8.29459	8.36458	10.4419	10.125	1.95386	3.8741	0.00682886	NM_014399	tetraspanin 13	TSPAN13	NM_014399	---	0005624 // membrane fraction // traceable author statement /// 0005887 // integral to plasma membrane // traceable author statement /// 0016020 // membrane // inferred from electronic annotation /// 0016021 // integral to membrane // inferred from electronic annotation	---	---	TSPAN13	tetraspanin 13
210052_s_at	TPX2	5.30417	1.9531	0.368219	3.87204	0	0	10.0143	10.1961	12.1122	12.0043	1.9531	3.87204	0.00291562	AF098158	TPX2, microtubule-associated, homolog (Xenopus laevis)	TPX2	NM_012112	0006915 // apoptosis // inferred from electronic annotation /// 0007049 // cell cycle // inferred from electronic annotation /// 0007067 // mitosis // inferred from electronic annotation /// 0007067 // mitosis // traceable author statement /// 0008283 // cell proliferation // traceable author statement /// 0032147 // activation of protein kinase activity // inferred from direct assay /// 0051301 …	0000922 // spindle pole // inferred from direct assay /// 0000922 // spindle pole // inferred from electronic annotation /// 0005634 // nucleus // inferred from direct assay /// 0005634 // nucleus // inferred from electronic annotation /// 0005634 // nucleus // traceable author statement /// 0005730 // nucleolus // inferred from direct assay /// 0005737 // cytoplasm // inferred from electronic an…	0005515 // protein binding // inferred from physical interaction /// 0005524 // ATP binding // traceable author statement /// 0005525 // GTP binding // traceable author statement /// 0019901 // protein kinase binding // inferred from physical interaction /// 0019901 // protein kinase binding // inferred from electronic annotation	---
226980_at	DEPDC1B	3.94445	1.93427	0.490377	3.82185	0	0.873665	6.72602	6.3238	8.56628	8.35208	1.93427	3.82185	0.0135937	AK001166	DEP domain containing 1B	DEPDC1B	NM_001145208 /// NM_018369	0007165 // signal transduction // inferred from electronic annotation /// 0023034 // intracellular signaling pathway // inferred from electronic annotation	0005622 // intracellular // inferred from electronic annotation	0005096 // GTPase activator activity // inferred from electronic annotation	---
1555826_at	EPR1	2.378	1.93381	0.813211	3.82064	0.0523603	12.9261	8.67842	8.95362	11.283	10.2166	1.93381	3.82064	0.0723956	BQ021146	effector cell peptidase receptor 1 (non-protein coding)	EPR1	NR_002219	---	---	---	Apoptosis // GenMAPP
235117_at	CHAC2	3.10004	1.9237	0.620542	3.79395	0	5.79648	7.49158	7.53087	9.7924	9.07746	1.9237	3.79395	0.0329342	AI191897	ChaC, cation transport regulator homolog 2 (E. coli)	CHAC2	NM_001008708	---	---	---	---
215509_s_at	BUB1	5.35258	1.9194	0.358594	3.78267	0	0	7.58651	7.71502	9.64158	9.49875	1.9194	3.78267	0.00249565	AL137654	budding uninhibited by benzimidazoles 1 homolog (yeast)	BUB1	NM_004336	0006468 // protein phosphorylation // inferred from electronic annotation /// 0006915 // apoptosis // inferred from electronic annotation /// 0007049 // cell cycle // inferred from electronic annotation /// 0007059 // chromosome segregation // inferred from electronic annotation /// 0007063 // regulation of sister chromatid cohesion // inferred from direct assay /// 0007067 // mitosis // inferred…	0000775 // chromosome, centromeric region // inferred from electronic annotation /// 0000776 // kinetochore // inferred from direct assay /// 0000776 // kinetochore // inferred from electronic annotation /// 0000776 // kinetochore // traceable author statement /// 0000777 // condensed chromosome kinetochore // inferred from direct assay /// 0000777 // condensed chromosome kinetochore // inferred …	0000166 // nucleotide binding // inferred from electronic annotation /// 0004672 // protein kinase activity // traceable author statement /// 0004672 // protein kinase activity // inferred from electronic annotation /// 0004674 // protein serine/threonine kinase activity // inferred from electronic annotation /// 0005515 // protein binding // inferred from physical interaction /// 0005524 // ATP …	Cell_cycle_KEGG // GenMAPP
204444_at	KIF11	3.67	1.90605	0.519358	3.7478	0	2.10659	7.82784	7.44754	9.71638	9.3711	1.90605	3.7478	0.0176763	NM_004523	kinesin family member 11	KIF11	NM_004523	0007018 // microtubule-based movement // inferred from electronic annotation /// 0007049 // cell cycle // inferred from electronic annotation /// 0007051 // spindle organization // inferred from mutant phenotype /// 0007052 // mitotic spindle organization // traceable author statement /// 0007067 // mitosis // traceable author statement /// 0007067 // mitosis // inferred from electronic annotatio…	0000922 // spindle pole // inferred from direct assay /// 0000922 // spindle pole // inferred from electronic annotation /// 0005737 // cytoplasm // inferred from electronic annotation /// 0005819 // spindle // inferred from direct assay /// 0005819 // spindle // traceable author statement /// 0005856 // cytoskeleton // inferred from electronic annotation /// 0005871 // kinesin complex // traceab…	0000166 // nucleotide binding // inferred from electronic annotation /// 0003774 // motor activity // inferred from electronic annotation /// 0003777 // microtubule motor activity // inferred from electronic annotation /// 0003777 // microtubule motor activity // traceable author statement /// 0005524 // ATP binding // inferred from electronic annotation /// 0019901 // protein kinase binding // i…	---
230645_at	FRMD3	3.72824	1.8852	0.505655	3.69405	0	1.81764	7.43994	6.95441	9.06917	9.09559	1.8852	3.69405	0.0162285	BF110588	FERM domain containing 3	FRMD3	NM_174938	---	0005737 // cytoplasm // inferred from electronic annotation /// 0005856 // cytoskeleton // inferred from electronic annotation /// 0016020 // membrane // inferred from electronic annotation /// 0016021 // integral to membrane // inferred from electronic annotation /// 0019898 // extrinsic to membrane // inferred from electronic annotation	0005488 // binding // inferred from electronic annotation /// 0008092 // cytoskeletal protein binding // inferred from electronic annotation	---
202779_s_at	UBE2S	4.60089	1.85947	0.404155	3.62875	0	0	9.77724	9.67557	11.4537	11.7181	1.85947	3.62875	0.00575119	NM_014501	ubiquitin-conjugating enzyme E2S	UBE2S	NM_014501	0006464 // protein modification process // traceable author statement /// 0007049 // cell cycle // inferred from electronic annotation /// 0010458 // exit from mitosis // inferred from direct assay /// 0010458 // exit from mitosis // inferred from mutant phenotype /// 0010994 // free ubiquitin chain polymerization // inferred from direct assay /// 0031145 // anaphase-promoting complex-dependent p…	0005680 // anaphase-promoting complex // inferred from direct assay	0000166 // nucleotide binding // inferred from electronic annotation /// 0004842 // ubiquitin-protein ligase activity // inferred from direct assay /// 0004842 // ubiquitin-protein ligase activity // inferred from electronic annotation /// 0005524 // ATP binding // inferred from electronic annotation /// 0016874 // ligase activity // inferred from electronic annotation /// 0019787 // small conjug…	---
237241_at	ECT2	2.54434	1.85657	0.729684	3.62144	0.0391894	11.0393	5.7057	5.01067	7.52696	6.90255	1.85657	3.62144	0.057873	AW269645	Epithelial cell transforming sequence 2 oncogene	ECT2	NM_018098	0000902 // cell morphogenesis // inferred from electronic annotation /// 0006915 // apoptosis // not recorded /// 0008624 // induction of apoptosis by extracellular signals // not recorded /// 0035023 // regulation of Rho protein signal transduction // inferred from electronic annotation /// 0043123 // positive regulation of I-kappaB kinase/NF-kappaB cascade // inferred from mutant phenotype	0005622 // intracellular // inferred from electronic annotation /// 0005829 // cytosol // not recorded	0004871 // signal transducer activity // inferred from mutant phenotype /// 0005085 // guanyl-nucleotide exchange factor activity // not recorded /// 0005085 // guanyl-nucleotide exchange factor activity // inferred from electronic annotation /// 0005089 // Rho guanyl-nucleotide exchange factor activity // inferred from electronic annotation /// 0005515 // protein binding // inferred from physica…	---
226219_at	ARHGAP30	6.21601	1.84824	0.297334	3.60059	0	0	7.15365	7.17052	8.97655	9.04409	1.84823	3.60059	0.000354475	AW575123	Rho GTPase activating protein 30	ARHGAP30	NM_001025598 /// NM_181720	0007165 // signal transduction // inferred from electronic annotation	0005622 // intracellular // inferred from electronic annotation	0005096 // GTPase activator activity // inferred from electronic annotation	---
212023_s_at	MKI67	5.31598	1.84314	0.346717	3.5879	0	0	7.10753	7.26768	9.05674	9.00474	1.84314	3.5879	0.0020799	AU147044	antigen identified by monoclonal antibody Ki-67	MKI67	NM_001145966 /// NM_002417	0007049 // cell cycle // inferred from electronic annotation /// 0007126 // meiosis // inferred from electronic annotation /// 0008283 // cell proliferation // traceable author statement /// 0008283 // cell proliferation // inferred from electronic annotation	0000775 // chromosome, centromeric region // inferred from electronic annotation /// 0000793 // condensed chromosome // inferred from electronic annotation /// 0005622 // intracellular // inferred from electronic annotation /// 0005634 // nucleus // inferred from direct assay /// 0005634 // nucleus // inferred from electronic annotation /// 0005730 // nucleolus // inferred from direct assay /// 0…	0000166 // nucleotide binding // inferred from electronic annotation /// 0005515 // protein binding // inferred from physical interaction /// 0005524 // ATP binding // inferred from electronic annotation /// 0008022 // protein C-terminus binding // inferred from physical interaction	---
223307_at	CDCA3	5.84878	1.8368	0.314049	3.57218	0	0	8.98188	9.08349	10.878	10.8609	1.8368	3.57218	0.000785857	BC002551	cell division cycle associated 3	CDCA3	NM_031299	0007049 // cell cycle // inferred from electronic annotation /// 0007067 // mitosis // inferred from electronic annotation /// 0051301 // cell division // inferred from electronic annotation	0005737 // cytoplasm // inferred from electronic annotation /// 0005829 // cytosol // inferred from electronic annotation	---	---
204962_s_at	CENPA	5.23023	1.83492	0.35083	3.56752	0	0	8.63198	8.49463	10.4537	10.3427	1.83492	3.56752	0.00230786	NM_001809	centromere protein A	CENPA	NM_001042426 /// NM_001809	0000132 // establishment of mitotic spindle orientation // inferred from mutant phenotype /// 0006334 // nucleosome assembly // inferred from electronic annotation /// 0044419 // interspecies interaction between organisms // inferred from electronic annotation /// 0051382 // kinetochore assembly // inferred from direct assay /// 0071459 // protein localization to chromosome, centromeric region //…	0000775 // chromosome, centromeric region // inferred from direct assay /// 0000775 // chromosome, centromeric region // inferred from electronic annotation /// 0000775 // chromosome, centromeric region // traceable author statement /// 0000776 // kinetochore // inferred from electronic annotation /// 0000777 // condensed chromosome kinetochore // inferred from electronic annotation /// 0000778 /…	0003677 // DNA binding // inferred from electronic annotation /// 0003682 // chromatin binding // traceable author statement /// 0005515 // protein binding // inferred from physical interaction	---
202705_at	CCNB2	6.21374	1.83418	0.295181	3.56568	0	0	9.29425	9.28111	11.0899	11.1538	1.83418	3.56568	0.000316782	NM_004701	cyclin B2	CCNB2	NM_004701	0001701 // in utero embryonic development // inferred from electronic annotation /// 0007049 // cell cycle // inferred from electronic annotation /// 0007067 // mitosis // inferred from electronic annotation /// 0040007 // growth // inferred from electronic annotation /// 0043029 // T cell homeostasis // inferred from electronic annotation /// 0048538 // thymus development // inferred from electr…	0005624 // membrane fraction // inferred from electronic annotation /// 0005634 // nucleus // inferred from electronic annotation /// 0005829 // cytosol // not recorded /// 0015630 // microtubule cytoskeleton // inferred from direct assay	0005515 // protein binding // inferred from physical interaction	Cell_cycle_KEGG // GenMAPP
204602_at	DKK1	5.96413	1.81902	0.304993	3.52841	0	0	10.2666	10.275	12.1321	12.0476	1.81902	3.52841	0.000544561	NM_012242	dickkopf homolog 1 (Xenopus laevis)	DKK1	NM_012242	0000904 // cell morphogenesis involved in differentiation // inferred from electronic annotation /// 0002090 // regulation of receptor internalization // inferred from direct assay /// 0007275 // multicellular organismal development // inferred from electronic annotation /// 0007492 // endoderm development // inferred from electronic annotation /// 0016055 // Wnt receptor signaling pathway // inf…	0005576 // extracellular region // inferred from electronic annotation /// 0005615 // extracellular space // inferred from direct assay /// 0005886 // plasma membrane // inferred from direct assay	0004871 // signal transducer activity // traceable author statement /// 0005515 // protein binding // inferred from physical interaction /// 0005515 // protein binding // inferred from electronic annotation /// 0008083 // growth factor activity // traceable author statement /// 0050750 // low-density lipoprotein receptor binding // inferred from direct assay	---
223423_at	GPR160	3.72904	1.81304	0.486195	3.51382	0	1.8138	8.20932	8.44897	10.331	9.95332	1.81304	3.51382	0.0148803	BC000181	G protein-coupled receptor 160	GPR160	NM_014373	0007165 // signal transduction // inferred from electronic annotation /// 0007186 // G-protein coupled receptor protein signaling pathway // inferred from electronic annotation	0005886 // plasma membrane // inferred from electronic annotation /// 0016020 // membrane // inferred from electronic annotation /// 0016021 // integral to membrane // inferred from electronic annotation	0004871 // signal transducer activity // inferred from electronic annotation /// 0004872 // receptor activity // inferred from electronic annotation /// 0004930 // G-protein coupled receptor activity // inferred from electronic annotation	---
218009_s_at	PRC1	4.80275	1.8069	0.376223	3.49891	0	0	9.29063	9.50457	11.243	11.166	1.8069	3.49891	0.0039359	NM_003981	protein regulator of cytokinesis 1	PRC1	NM_003981 /// NM_199413 /// NM_199414	0000022 // mitotic spindle elongation // traceable author statement /// 0000910 // cytokinesis // traceable author statement /// 0007049 // cell cycle // inferred from electronic annotation /// 0051301 // cell division // inferred from electronic annotation	0000922 // spindle pole // inferred from electronic annotation /// 0005634 // nucleus // inferred from electronic annotation /// 0005634 // nucleus // traceable author statement /// 0005737 // cytoplasm // inferred from electronic annotation /// 0005856 // cytoskeleton // inferred from electronic annotation /// 0005874 // microtubule // inferred from electronic annotation /// 0005876 // spindle m…	0005515 // protein binding // inferred from physical interaction	---
238756_at	GAS2L3	3.40855	1.80669	0.530047	3.4984	0	3.59786	7.44197	7.36894	9.47716	8.94713	1.80669	3.4984	0.0212294	AI860012	Growth arrest-specific 2 like 3	GAS2L3	NM_174942	0007050 // cell cycle arrest // inferred from electronic annotation	---	---	---
206364_at	KIF14	2.67763	1.80485	0.674047	3.49392	0	9.63144	7.39982	6.78423	9.17003	8.62372	1.80485	3.49392	0.0482556	NM_014875	kinesin family member 14	KIF14	NM_014875	0007018 // microtubule-based movement // inferred from electronic annotation	0005634 // nucleus // inferred from electronic annotation /// 0005737 // cytoplasm // inferred from electronic annotation /// 0005819 // spindle // inferred from electronic annotation /// 0005856 // cytoskeleton // inferred from electronic annotation /// 0005874 // microtubule // inferred from electronic annotation	0000166 // nucleotide binding // inferred from electronic annotation /// 0003774 // motor activity // inferred from electronic annotation /// 0003777 // microtubule motor activity // inferred from electronic annotation /// 0005515 // protein binding // inferred from physical interaction /// 0005524 // ATP binding // inferred from electronic annotation	---
202458_at	PRSS23	4.90119	1.7993	0.367116	3.48052	0	0	9.79461	10.0035	11.7035	11.6933	1.7993	3.48052	0.00336174	NM_007173	protease, serine, 23	PRSS23	NM_007173	0006508 // proteolysis // inferred from electronic annotation	0005576 // extracellular region // inferred from electronic annotation /// 0005634 // nucleus // inferred from direct assay	0003824 // catalytic activity // inferred from electronic annotation /// 0004252 // serine-type endopeptidase activity // inferred from electronic annotation /// 0008233 // peptidase activity // inferred from electronic annotation /// 0008236 // serine-type peptidase activity // inferred from electronic annotation /// 0016787 // hydrolase activity // inferred from electronic annotation	---
203925_at	GCLM	3.45007	1.78673	0.517881	3.45031	0	3.33912	8.15965	8.41344	10.2949	9.85168	1.78673	3.45031	0.01982	NM_002061	glutamate-cysteine ligase, modifier subunit	GCLM	NM_002061	0006534 // cysteine metabolic process // inferred from electronic annotation /// 0006536 // glutamate metabolic process // inferred from direct assay /// 0006749 // glutathione metabolic process // inferred from electronic annotation /// 0006750 // glutathione biosynthetic process // inferred from direct assay /// 0006750 // glutathione biosynthetic process // inferred from mutant phenotype /// 0…	0005625 // soluble fraction // inferred from direct assay /// 0005829 // cytosol // non-traceable author statement /// 0017109 // glutamate-cysteine ligase complex // inferred from electronic annotation	0004357 // glutamate-cysteine ligase activity // inferred from direct assay /// 0004357 // glutamate-cysteine ligase activity // inferred from mutant phenotype /// 0004357 // glutamate-cysteine ligase activity // inferred from electronic annotation /// 0005515 // protein binding // inferred from physical interaction /// 0016491 // oxidoreductase activity // inferred from electronic annotation ///…	---
222077_s_at	RACGAP1	4.33627	1.77174	0.408587	3.41466	0	0	9.32965	9.40733	11.281	10.9994	1.77174	3.41466	0.00672756	AU153848	Rac GTPase activating protein 1	RACGAP1	NM_001126103 /// NM_001126104 /// NM_013277	0000910 // cytokinesis // inferred from direct assay /// 0000915 // cytokinesis, actomyosin contractile ring assembly // inferred from mutant phenotype /// 0006810 // transport // inferred from electronic annotation /// 0006811 // ion transport // inferred from electronic annotation /// 0007049 // cell cycle // inferred from electronic annotation /// 0007108 // cytokinesis, initiation of separati…	0001669 // acrosomal vesicle // inferred from electronic annotation /// 0005622 // intracellular // inferred from electronic annotation /// 0005634 // nucleus // inferred from direct assay /// 0005634 // nucleus // inferred from electronic annotation /// 0005737 // cytoplasm // inferred from electronic annotation /// 0005819 // spindle // inferred from electronic annotation /// 0005856 // cytoske…	0005096 // GTPase activator activity // inferred from direct assay /// 0005096 // GTPase activator activity // inferred from electronic annotation /// 0005515 // protein binding // inferred from physical interaction /// 0008022 // protein C-terminus binding // inferred from physical interaction /// 0043014 // alpha-tubulin binding // inferred from direct assay /// 0043015 // gamma-tubulin binding…	S1P_Signaling // GenMAPP
220651_s_at	MCM10	3.68117	1.75776	0.477499	3.38172	0	2.05001	7.62693	7.93839	9.68861	9.39222	1.75776	3.38172	0.0146296	NM_018518	minichromosome maintenance complex component 10	MCM10	NM_018518 /// NM_182751	0006260 // DNA replication // not recorded /// 0006260 // DNA replication // inferred from electronic annotation	0005634 // nucleus // inferred from direct assay /// 0005634 // nucleus // inferred from electronic annotation /// 0005654 // nucleoplasm // not recorded	0005515 // protein binding // inferred from physical interaction /// 0046872 // metal ion binding // inferred from electronic annotation	---
213226_at	CCNA2	3.49768	1.74743	0.499597	3.3576	0	3.05281	8.51029	8.4715	10.4746	10.0021	1.74743	3.3576	0.0179126	AI346350	cyclin A2	CCNA2	NM_001237	0007049 // cell cycle // inferred from electronic annotation /// 0007067 // mitosis // inferred from electronic annotation /// 0007095 // mitotic cell cycle G2/M transition DNA damage checkpoint // traceable author statement /// 0007265 // Ras protein signal transduction // inferred from expression pattern /// 0031100 // organ regeneration // inferred from electronic annotation /// 0032355 // res…	0001939 // female pronucleus // inferred from electronic annotation /// 0001940 // male pronucleus // inferred from electronic annotation /// 0005634 // nucleus // inferred from direct assay /// 0005634 // nucleus // inferred from electronic annotation /// 0005654 // nucleoplasm // not recorded /// 0005737 // cytoplasm // inferred from electronic annotation	0005515 // protein binding // inferred from physical interaction	Cell_cycle_KEGG // GenMAPP
208998_at	UCP2	5.6601	1.74697	0.308647	3.35653	0	0	7.29285	7.20629	8.98061	9.01247	1.74697	3.35653	0.000696208	U94592	uncoupling protein 2 (mitochondrial, proton carrier)	UCP2	NM_003355	0000303 // response to superoxide // inferred from electronic annotation /// 0001666 // response to hypoxia // inferred from electronic annotation /// 0006810 // transport // non-traceable author statement /// 0006810 // transport // inferred from electronic annotation /// 0006839 // mitochondrial transport // inferred from electronic annotation /// 0009749 // response to glucose stimulus // infe…	0005739 // mitochondrion // inferred from electronic annotation /// 0005743 // mitochondrial inner membrane // inferred from electronic annotation /// 0005743 // mitochondrial inner membrane // non-traceable author statement /// 0016020 // membrane // inferred from electronic annotation /// 0016021 // integral to membrane // inferred from electronic annotation	0005488 // binding // inferred from electronic annotation	Electron_Transport_Chain // GenMAPP
201896_s_at	PSRC1	5.8113	1.74628	0.300498	3.35493	0	0	8.0373	8.02905	9.81721	9.74171	1.74628	3.35493	0.000472449	BC001425	proline/serine-rich coiled-coil 1	PSRC1	NM_001005290 /// NM_001032291 /// NM_032636	0001578 // microtubule bundle formation // inferred from sequence or structural similarity /// 0001578 // microtubule bundle formation // inferred from electronic annotation /// 0007049 // cell cycle // inferred from sequence or structural similarity /// 0007049 // cell cycle // inferred from electronic annotation /// 0007067 // mitosis // inferred from electronic annotation /// 0007080 // mitoti…	0000922 // spindle pole // inferred from direct assay /// 0000922 // spindle pole // inferred from electronic annotation /// 0005737 // cytoplasm // inferred from sequence or structural similarity /// 0005737 // cytoplasm // inferred from electronic annotation /// 0005819 // spindle // inferred from sequence or structural similarity /// 0005819 // spindle // inferred from electronic annotation //…	0005515 // protein binding // inferred from physical interaction /// 0005515 // protein binding // inferred from electronic annotation /// 0008017 // microtubule binding // inferred from sequence or structural similarity /// 0008017 // microtubule binding // inferred from electronic annotation	---
221728_x_at	XIST	3.34215	1.73031	0.517725	3.318	0	4.02961	6.2158	6.33135	8.25246	7.75531	1.73031	3.318	0.0210673	AA628440	X (inactive)-specific transcript (non-protein coding)	XIST	NR_001564	---	---	---	---
208103_s_at	ANP32E	2.93987	1.71389	0.582982	3.28044	0	7.13713	7.06249	7.36928	9.21113	8.64842	1.71389	3.28044	0.0332271	NM_030920	acidic (leucine-rich) nuclear phosphoprotein 32 family, member E	ANP32E	NM_001136478 /// NM_001136479 /// NM_030920	---	0005634 // nucleus // inferred from direct assay /// 0005634 // nucleus // inferred from sequence or structural similarity /// 0005634 // nucleus // inferred from electronic annotation /// 0005737 // cytoplasm // inferred from electronic annotation /// 0016023 // cytoplasmic membrane-bounded vesicle // inferred from sequence or structural similarity /// 0016023 // cytoplasmic membrane-bounded ves…	0005515 // protein binding // inferred from electronic annotation /// 0019212 // phosphatase inhibitor activity // inferred from sequence or structural similarity /// 0019212 // phosphatase inhibitor activity // inferred from electronic annotation	---
211080_s_at	NEK2	4.92844	1.70515	0.345983	3.26064	0	0	6.78873	6.81407	8.42407	8.58904	1.70515	3.26064	0.00238683	Z25425	NIMA (never in mitosis gene a)-related kinase 2	NEK2	NM_002497	0000070 // mitotic sister chromatid segregation // inferred from electronic annotation /// 0006468 // protein phosphorylation // inferred from electronic annotation /// 0007049 // cell cycle // inferred from electronic annotation /// 0007059 // chromosome segregation // inferred from direct assay /// 0007059 // chromosome segregation // inferred from electronic annotation /// 0007067 // mitosis /…	0000775 // chromosome, centromeric region // inferred from electronic annotation /// 0000776 // kinetochore // inferred from direct assay /// 0000776 // kinetochore // inferred from electronic annotation /// 0000777 // condensed chromosome kinetochore // inferred from electronic annotation /// 0000794 // condensed nuclear chromosome // inferred from electronic annotation /// 0000922 // spindle po…	0000166 // nucleotide binding // inferred from electronic annotation /// 0004672 // protein kinase activity // inferred from direct assay /// 0004672 // protein kinase activity // inferred from electronic annotation /// 0004674 // protein serine/threonine kinase activity // inferred from electronic annotation /// 0004674 // protein serine/threonine kinase activity // traceable author statement //…	---
220060_s_at	C12orf48	3.60938	1.68646	0.467243	3.21865	0	2.42371	7.40721	7.05525	9.02228	8.81309	1.68646	3.21865	0.0144171	NM_017915	chromosome 12 open reading frame 48	C12orf48	NM_017915	---	0005634 // nucleus // inferred from electronic annotation /// 0005737 // cytoplasm // inferred from electronic annotation	0003677 // DNA binding // inferred from electronic annotation	---
202900_s_at	NUP88	5.44516	1.68483	0.309418	3.21502	0	0	9.98724	10.0063	11.7275	11.6357	1.68483	3.21502	0.000773661	NM_002532	nucleoporin 88kDa	NUP88	NM_002532	0006810 // transport // inferred from electronic annotation /// 0006897 // endocytosis // inferred from electronic annotation /// 0006897 // endocytosis // traceable author statement /// 0006915 // apoptosis // inferred from electronic annotation /// 0006944 // cellular membrane fusion // traceable author statement /// 0015031 // protein transport // inferred from electronic annotation /// 005102…	0005634 // nucleus // inferred from electronic annotation /// 0005643 // nuclear pore // inferred from electronic annotation /// 0005643 // nuclear pore // traceable author statement /// 0005737 // cytoplasm // inferred from electronic annotation /// 0005768 // endosome // inferred from electronic annotation /// 0005769 // early endosome // inferred from electronic annotation /// 0005769 // early…	0005096 // GTPase activator activity // inferred from electronic annotation /// 0005215 // transporter activity // traceable author statement /// 0005515 // protein binding // inferred from physical interaction /// 0008083 // growth factor activity // inferred from electronic annotation /// 0042803 // protein homodimerization activity // inferred from physical interaction	---
204170_s_at	CKS2	4.20181	1.68362	0.40069	3.21234	0	0	10.0142	9.83245	11.5029	11.711	1.68362	3.21234	0.006667	NM_001827	CDC28 protein kinase regulatory subunit 2	CKS2	NM_001827	0000079 // regulation of cyclin-dependent protein kinase activity // traceable author statement /// 0007049 // cell cycle // non-traceable author statement /// 0007049 // cell cycle // inferred from electronic annotation /// 0007051 // spindle organization // non-traceable author statement /// 0008283 // cell proliferation // traceable author statement /// 0048015 // phosphoinositide-mediated sig…	---	0016301 // kinase activity // inferred from electronic annotation /// 0016538 // cyclin-dependent protein kinase regulator activity // inferred from electronic annotation	---
223381_at	NUF2	2.68658	1.67849	0.62477	3.20094	0	9.54024	8.17479	7.75165	9.93575	9.34768	1.67849	3.20094	0.0435553	AF326731	NUF2, NDC80 kinetochore complex component, homolog (S. cerevisiae)	NUF2	NM_031423 /// NM_145697	0007049 // cell cycle // inferred from electronic annotation /// 0007059 // chromosome segregation // non-traceable author statement /// 0007067 // mitosis // inferred from electronic annotation /// 0051301 // cell division // inferred from electronic annotation	0000775 // chromosome, centromeric region // non-traceable author statement /// 0000775 // chromosome, centromeric region // inferred from electronic annotation /// 0000776 // kinetochore // inferred from electronic annotation /// 0000777 // condensed chromosome kinetochore // inferred from electronic annotation /// 0005634 // nucleus // inferred from electronic annotation /// 0031262 // Ndc80 co…	0005515 // protein binding // inferred from physical interaction	---
222646_s_at	ERO1L	3.89694	1.67166	0.428969	3.18582	0	1.06424	8.3896	8.34087	10.2015	9.87225	1.67166	3.18582	0.00976839	AW268365	ERO1-like (S. cerevisiae)	ERO1L	NM_014584	0006457 // protein folding // traceable author statement /// 0006457 // protein folding // inferred from electronic annotation /// 0006464 // protein modification process // traceable author statement /// 0006467 // protein thiol-disulfide exchange // inferred from electronic annotation /// 0006810 // transport // inferred from electronic annotation /// 0009266 // response to temperature stimulus…	0005624 // membrane fraction // traceable author statement /// 0005783 // endoplasmic reticulum // inferred from direct assay /// 0005783 // endoplasmic reticulum // inferred from electronic annotation /// 0005783 // endoplasmic reticulum // traceable author statement /// 0005789 // endoplasmic reticulum membrane // inferred from electronic annotation /// 0005792 // microsome // traceable author …	0005515 // protein binding // inferred from electronic annotation /// 0016491 // oxidoreductase activity // inferred from direct assay /// 0016491 // oxidoreductase activity // inferred from electronic annotation /// 0016671 // oxidoreductase activity, acting on a sulfur group of donors, disulfide as acceptor // inferred from electronic annotation /// 0050660 // FAD or FADH2 binding // inferred f…	---
219148_at	PBK	4.75696	1.66176	0.349332	3.16402	0	0	8.91349	8.88327	10.6456	10.4747	1.66176	3.16402	0.00271755	NM_018492	PDZ binding kinase	PBK	NM_018492	0006468 // protein phosphorylation // non-traceable author statement /// 0006468 // protein phosphorylation // inferred from electronic annotation /// 0007067 // mitosis // non-traceable author statement	---	0000166 // nucleotide binding // inferred from electronic annotation /// 0004672 // protein kinase activity // inferred from electronic annotation /// 0004674 // protein serine/threonine kinase activity // traceable author statement /// 0004674 // protein serine/threonine kinase activity // inferred from electronic annotation /// 0005515 // protein binding // inferred from physical interaction //…	---
204033_at	TRIP13	4.36681	1.66068	0.380295	3.16165	0	0	8.97965	9.12583	10.8058	10.6211	1.66068	3.16165	0.00499137	NM_004237	thyroid hormone receptor interactor 13	TRIP13	NM_001166260 /// NM_004237	0000239 // pachytene // inferred from electronic annotation /// 0001556 // oocyte maturation // inferred from electronic annotation /// 0006302 // double-strand break repair // inferred from electronic annotation /// 0006366 // transcription from RNA polymerase II promoter // traceable author statement /// 0007131 // reciprocal meiotic recombination // inferred from electronic annotation /// 0007…	0001673 // male germ cell nucleus // inferred from electronic annotation /// 0005634 // nucleus // traceable author statement	0000166 // nucleotide binding // inferred from electronic annotation /// 0003712 // transcription cofactor activity // traceable author statement /// 0004872 // receptor activity // inferred from electronic annotation /// 0005515 // protein binding // inferred from physical interaction /// 0005515 // protein binding // inferred from electronic annotation /// 0005524 // ATP binding // non-traceabl…	---
203359_s_at	MYCBP	4.85566	1.6572	0.341293	3.15404	0	0	8.28226	8.38079	10.0502	9.92727	1.6572	3.15404	0.00225139	AL525412	c-myc binding protein	MYCBP	NM_012333	0006350 // transcription // inferred from electronic annotation /// 0007283 // spermatogenesis // inferred from expression pattern /// 0045449 // regulation of transcription // inferred from direct assay /// 0045449 // regulation of transcription // inferred from electronic annotation	0005634 // nucleus // inferred from direct assay /// 0005634 // nucleus // inferred from electronic annotation /// 0005737 // cytoplasm // inferred from direct assay /// 0005737 // cytoplasm // inferred from electronic annotation /// 0005739 // mitochondrion // inferred from electronic annotation	0003713 // transcription coactivator activity // inferred from direct assay /// 0005515 // protein binding // inferred from physical interaction	Calcium_regulation_in_cardiac_cells // GenMAPP
203554_x_at	PTTG1	4.66565	1.65596	0.354925	3.15132	0	0	10.8092	10.9159	12.4431	12.594	1.65596	3.15132	0.00309886	NM_004219	pituitary tumor-transforming 1	PTTG1	NM_004219	0006259 // DNA metabolic process // inferred from electronic annotation /// 0006281 // DNA repair // inferred from electronic annotation /// 0006366 // transcription from RNA polymerase II promoter // traceable author statement /// 0006974 // response to DNA damage stimulus // inferred from electronic annotation /// 0007049 // cell cycle // inferred from electronic annotation /// 0007059 // chrom…	0005634 // nucleus // inferred from electronic annotation /// 0005634 // nucleus // traceable author statement /// 0005737 // cytoplasm // inferred from electronic annotation /// 0005737 // cytoplasm // traceable author statement /// 0005829 // cytosol // not recorded	0003700 // sequence-specific DNA binding transcription factor activity // traceable author statement /// 0004869 // cysteine-type endopeptidase inhibitor activity // non-traceable author statement /// 0005515 // protein binding // inferred from physical interaction /// 0017124 // SH3 domain binding // inferred from electronic annotation	Cell_cycle_KEGG // GenMAPP
203276_at	LMNB1	3.44551	1.65325	0.479827	3.14541	0	3.36715	7.94946	8.03409	9.85816	9.43188	1.65325	3.14541	0.0168408	NM_005573	lamin B1	LMNB1	NM_001198557 /// NM_005573	---	0005634 // nucleus // inferred from electronic annotation /// 0005635 // nuclear envelope // not recorded /// 0005637 // nuclear inner membrane // inferred from electronic annotation /// 0005638 // lamin filament // inferred from electronic annotation /// 0005638 // lamin filament // traceable author statement /// 0005882 // intermediate filament // inferred from electronic annotation /// 0016020…	0005198 // structural molecule activity // inferred from electronic annotation /// 0005198 // structural molecule activity // traceable author statement /// 0005515 // protein binding // inferred from physical interaction	---
205436_s_at	H2AFX	5.16944	1.65214	0.319598	3.143	0	0	10.6566	10.7428	12.3144	12.3892	1.65214	3.143	0.0011911	NM_002105	H2A histone family, member X	H2AFX	NM_002105	0000077 // DNA damage checkpoint // inferred from direct assay /// 0000724 // double-strand break repair via homologous recombination // inferred from electronic annotation /// 0006281 // DNA repair // inferred from electronic annotation /// 0006302 // double-strand break repair // non-traceable author statement /// 0006310 // DNA recombination // inferred from electronic annotation /// 0006334 /…	0000781 // chromosome, telomeric region // inferred from direct assay /// 0000785 // chromatin // inferred from electronic annotation /// 0000786 // nucleosome // non-traceable author statement /// 0000786 // nucleosome // inferred from electronic annotation /// 0000790 // nuclear chromatin // inferred from electronic annotation /// 0001673 // male germ cell nucleus // inferred from electronic an…	0003677 // DNA binding // non-traceable author statement /// 0003677 // DNA binding // inferred from electronic annotation /// 0003684 // damaged DNA binding // inferred from electronic annotation /// 0005515 // protein binding // inferred from physical interaction /// 0005515 // protein binding // inferred from electronic annotation /// 0019899 // enzyme binding // inferred from physical interac…	Proteasome_Degradation // GenMAPP
229644_at	PREP	5.51284	1.64896	0.299112	3.13607	0	0	6.88441	6.95079	8.58195	8.55116	1.64896	3.13607	0.000491872	AA534420	prolyl endopeptidase	PREP	NM_002726	0006508 // proteolysis // inferred from electronic annotation /// 0006508 // proteolysis // traceable author statement	0005634 // nucleus // inferred from electronic annotation /// 0005737 // cytoplasm // inferred from electronic annotation /// 0005737 // cytoplasm // traceable author statement /// 0005829 // cytosol // inferred from electronic annotation	0004175 // endopeptidase activity // inferred from electronic annotation /// 0004252 // serine-type endopeptidase activity // inferred from electronic annotation /// 0004252 // serine-type endopeptidase activity // traceable author statement /// 0008233 // peptidase activity // inferred from electronic annotation /// 0008236 // serine-type peptidase activity // traceable author statement /// 0008…	---
206023_at	NMU	5.42196	1.63183	0.300966	3.09905	0	0	7.66246	7.58586	9.25275	9.25922	1.63183	3.09905	0.000554404	NM_006681	neuromedin U	NMU	NM_006681	0001696 // gastric acid secretion // inferred from electronic annotation /// 0006940 // regulation of smooth muscle contraction // traceable author statement /// 0006940 // regulation of smooth muscle contraction // inferred from electronic annotation /// 0006950 // response to stress // inferred from electronic annotation /// 0007165 // signal transduction // traceable author statement /// 00071…	0005576 // extracellular region // inferred from electronic annotation /// 0043195 // terminal button // inferred from electronic annotation	0005102 // receptor binding // traceable author statement /// 0042922 // neuromedin U receptor binding // inferred from electronic annotation	---
219555_s_at	CENPN	5.5018	1.62894	0.296075	3.09286	0	0	9.45827	9.42171	11.0408	11.0971	1.62894	3.09286	0.000423864	NM_018455	centromere protein N	CENPN	NM_001100624 /// NM_001100625 /// NM_018455	---	0000775 // chromosome, centromeric region // inferred from electronic annotation /// 0000776 // kinetochore // inferred from electronic annotation /// 0000777 // condensed chromosome kinetochore // inferred from electronic annotation /// 0005634 // nucleus // inferred from electronic annotation	---	---
204162_at	NDC80	3.69573	1.62238	0.438988	3.07883	0	1.97706	8.85164	8.5139	10.3564	10.254	1.62238	3.07883	0.0116242	NM_006101	NDC80 homolog, kinetochore complex component (S. cerevisiae)	NDC80	NM_006101	0000070 // mitotic sister chromatid segregation // traceable author statement /// 0000132 // establishment of mitotic spindle orientation // inferred from mutant phenotype /// 0007049 // cell cycle // non-traceable author statement /// 0007049 // cell cycle // inferred from electronic annotation /// 0007051 // spindle organization // non-traceable author statement /// 0007052 // mitotic spindle o…	0000775 // chromosome, centromeric region // traceable author statement /// 0000775 // chromosome, centromeric region // inferred from electronic annotation /// 0000776 // kinetochore // inferred from direct assay /// 0000776 // kinetochore // inferred from electronic annotation /// 0000777 // condensed chromosome kinetochore // inferred from direct assay /// 0000777 // condensed chromosome kinet…	0005515 // protein binding // inferred from physical interaction /// 0005515 // protein binding // inferred from electronic annotation	---
214214_s_at	C1QBP	4.31486	1.6083	0.372735	3.04892	0	0	10.7013	10.6673	12.4015	12.1837	1.6083	3.04892	0.00466279	AU151801	complement component 1, q subcomponent binding protein	C1QBP	NM_001212	0006955 // immune response // traceable author statement /// 0044419 // interspecies interaction between organisms // inferred from electronic annotation	0005634 // nucleus // inferred from electronic annotation /// 0005739 // mitochondrion // inferred from electronic annotation /// 0005759 // mitochondrial matrix // inferred from electronic annotation /// 0005886 // plasma membrane // traceable author statement /// 0016020 // membrane // inferred from direct assay	0001849 // complement component C1q binding // inferred from electronic annotation /// 0005515 // protein binding // inferred from physical interaction	---
201250_s_at	SLC2A1	4.90333	1.6062	0.327573	3.04449	0	0	8.49365	8.49306	10.1646	10.0345	1.6062	3.04449	0.00163595	NM_006516	solute carrier family 2 (facilitated glucose transporter), member 1	SLC2A1	NM_006516	0006810 // transport // inferred from electronic annotation /// 0006970 // response to osmotic stress // inferred from electronic annotation /// 0008643 // carbohydrate transport // inferred from electronic annotation /// 0015758 // glucose transport // traceable author statement /// 0015758 // glucose transport // inferred from electronic annotation /// 0042908 // xenobiotic transport // inferre…	0005622 // intracellular // inferred from electronic annotation /// 0005624 // membrane fraction // traceable author statement /// 0005737 // cytoplasm // inferred from electronic annotation /// 0005886 // plasma membrane // not recorded /// 0005886 // plasma membrane // inferred from electronic annotation /// 0005901 // caveola // inferred from electronic annotation /// 0005911 // cell-cell junc…	0005215 // transporter activity // inferred from electronic annotation /// 0005355 // glucose transmembrane transporter activity // traceable author statement /// 0005355 // glucose transmembrane transporter activity // inferred from electronic annotation /// 0005515 // protein binding // inferred from electronic annotation /// 0019900 // kinase binding // inferred from electronic annotation /// …	---
201774_s_at	NCAPD2	4.157	1.59806	0.384425	3.02735	0	0.129586	9.34088	9.43806	11.0993	10.8757	1.59806	3.02735	0.00576815	AK022511	non-SMC condensin I complex, subunit D2	NCAPD2	NM_014865	0006886 // intracellular protein transport // inferred from electronic annotation /// 0007049 // cell cycle // inferred from electronic annotation /// 0007067 // mitosis // inferred from electronic annotation /// 0007076 // mitotic chromosome condensation // inferred from direct assay /// 0007076 // mitotic chromosome condensation // non-traceable author statement /// 0016192 // vesicle-mediated …	0000228 // nuclear chromosome // inferred from direct assay /// 0000793 // condensed chromosome // inferred from direct assay /// 0000793 // condensed chromosome // inferred from electronic annotation /// 0000796 // condensin complex // inferred from direct assay /// 0000797 // condensin core heterodimer // non-traceable author statement /// 0005634 // nucleus // non-traceable author statement //…	0005488 // binding // inferred from electronic annotation /// 0005515 // protein binding // inferred from physical interaction /// 0005515 // protein binding // inferred from electronic annotation /// 0042393 // histone binding // inferred from direct assay /// 0042393 // histone binding // non-traceable author statement	---
228293_at	DEPDC7	3.46878	1.59757	0.460557	3.02633	0	3.22532	5.16235	5.14175	6.94738	6.55186	1.59757	3.02633	0.01502	AJ245600	DEP domain containing 7	DEPDC7	NM_001077242 /// NM_139160	---	---	---	---
227928_at	C12orf48	2.76406	1.59564	0.577279	3.02228	0	8.76863	6.76298	6.50626	8.51765	7.94287	1.59564	3.02228	0.0367775	AI224977	chromosome 12 open reading frame 48	C12orf48	NM_017915	---	0005634 // nucleus // inferred from electronic annotation /// 0005737 // cytoplasm // inferred from electronic annotation	0003677 // DNA binding // inferred from electronic annotation	---
230165_at	SGOL2	2.31854	1.58816	0.684981	3.00665	0.0523603	13.6348	6.47284	6.05308	8.21775	7.48449	1.58816	3.00665	0.0640358	N31731	shugoshin-like 2 (S. pombe)	SGOL2	NM_001160033 /// NM_001160046 /// NM_152524	0007049 // cell cycle // inferred from electronic annotation /// 0007059 // chromosome segregation // inferred from electronic annotation /// 0007126 // meiosis // inferred from electronic annotation /// 0008104 // protein localization // inferred from electronic annotation /// 0051301 // cell division // inferred from electronic annotation /// 0051754 // meiotic sister chromatid cohesion, centro…	0000775 // chromosome, centromeric region // inferred from direct assay /// 0000775 // chromosome, centromeric region // inferred from electronic annotation /// 0000776 // kinetochore // inferred from electronic annotation /// 0000777 // condensed chromosome kinetochore // inferred from electronic annotation /// 0000780 // condensed nuclear chromosome, centromeric region // inferred from electron…	0005515 // protein binding // inferred from physical interaction	---
220014_at	PRR16	3.7379	1.58702	0.424576	3.00429	0	1.77119	4.62841	4.66495	6.39472	6.07269	1.58702	3.00429	0.0102659	NM_016644	proline rich 16	PRR16	NM_016644	---	---	---	---
203360_s_at	MYCBP	3.99266	1.58386	0.396692	2.9977	0	0.689624	8.5633	8.43861	10.2036	9.96602	1.58386	2.9977	0.00709903	D50692	c-myc binding protein	MYCBP	NM_012333	0006350 // transcription // inferred from electronic annotation /// 0007283 // spermatogenesis // inferred from expression pattern /// 0045449 // regulation of transcription // inferred from direct assay /// 0045449 // regulation of transcription // inferred from electronic annotation	0005634 // nucleus // inferred from direct assay /// 0005634 // nucleus // inferred from electronic annotation /// 0005737 // cytoplasm // inferred from direct assay /// 0005737 // cytoplasm // inferred from electronic annotation /// 0005739 // mitochondrion // inferred from electronic annotation	0003713 // transcription coactivator activity // inferred from direct assay /// 0005515 // protein binding // inferred from physical interaction	Calcium_regulation_in_cardiac_cells // GenMAPP
225944_at	NLN	2.95481	1.5827	0.535635	2.9953	0	7.00615	7.11589	7.28961	9.04438	8.52652	1.5827	2.9953	0.0285091	AW006938	neurolysin (metallopeptidase M3 family)	NLN	NM_020726	0006508 // proteolysis // inferred from electronic annotation	0005737 // cytoplasm // inferred from electronic annotation /// 0005739 // mitochondrion // inferred from electronic annotation /// 0005758 // mitochondrial intermembrane space // inferred from electronic annotation	0004222 // metalloendopeptidase activity // inferred from electronic annotation /// 0008233 // peptidase activity // inferred from electronic annotation /// 0008237 // metallopeptidase activity // inferred from electronic annotation /// 0016787 // hydrolase activity // inferred from electronic annotation /// 0046872 // metal ion binding // inferred from electronic annotation	---
202954_at	UBE2C	4.66188	1.57965	0.338843	2.98896	0	0	9.68423	9.77059	11.2441	11.37	1.57965	2.98896	0.00232591	NM_007019	ubiquitin-conjugating enzyme E2C	UBE2C	NM_007019 /// NM_181799 /// NM_181800 /// NM_181801 /// NM_181802 /// NM_181803	0006511 // ubiquitin-dependent protein catabolic process // inferred from direct assay /// 0007049 // cell cycle // non-traceable author statement /// 0007049 // cell cycle // inferred from electronic annotation /// 0007051 // spindle organization // non-traceable author statement /// 0007067 // mitosis // inferred from electronic annotation /// 0008054 // cyclin catabolic process // inferred fro…	0005654 // nucleoplasm // not recorded /// 0005680 // anaphase-promoting complex // inferred from direct assay /// 0005829 // cytosol // not recorded	0000166 // nucleotide binding // inferred from electronic annotation /// 0004842 // ubiquitin-protein ligase activity // inferred from direct assay /// 0004842 // ubiquitin-protein ligase activity // inferred from electronic annotation /// 0005515 // protein binding // inferred from physical interaction /// 0005524 // ATP binding // inferred from electronic annotation /// 0016874 // ligase activi…	---
209464_at	AURKB	5.2398	1.57922	0.301389	2.98807	0	0	8.37405	8.43568	9.9604	10.0078	1.57922	2.98807	0.000604995	AB011446	aurora kinase B	AURKB	NM_004217	0000910 // cytokinesis // inferred from electronic annotation /// 0006468 // protein phosphorylation // inferred from electronic annotation /// 0007049 // cell cycle // inferred from electronic annotation /// 0007067 // mitosis // inferred from electronic annotation /// 0034501 // protein localization to kinetochore // inferred from mutant phenotype /// 0051301 // cell division // inferred from e…	0000775 // chromosome, centromeric region // inferred from electronic annotation /// 0000779 // condensed chromosome, centromeric region // inferred from direct assay /// 0000780 // condensed nuclear chromosome, centromeric region // inferred from direct assay /// 0005634 // nucleus // inferred from electronic annotation /// 0005737 // cytoplasm // inferred from electronic annotation /// 0005819 …	0000166 // nucleotide binding // inferred from electronic annotation /// 0004672 // protein kinase activity // inferred from electronic annotation /// 0004674 // protein serine/threonine kinase activity // inferred from electronic annotation /// 0005515 // protein binding // inferred from physical interaction /// 0005524 // ATP binding // inferred from electronic annotation /// 0016301 // kinase …	---
212021_s_at	MKI67	2.95688	1.57881	0.533944	2.98723	0	6.98814	7.82944	8.17418	9.79028	9.37096	1.57881	2.98723	0.0283052	AU132185	antigen identified by monoclonal antibody Ki-67	MKI67	NM_001145966 /// NM_002417	0007049 // cell cycle // inferred from electronic annotation /// 0007126 // meiosis // inferred from electronic annotation /// 0008283 // cell proliferation // traceable author statement /// 0008283 // cell proliferation // inferred from electronic annotation	0000775 // chromosome, centromeric region // inferred from electronic annotation /// 0000793 // condensed chromosome // inferred from electronic annotation /// 0005622 // intracellular // inferred from electronic annotation /// 0005634 // nucleus // inferred from direct assay /// 0005634 // nucleus // inferred from electronic annotation /// 0005730 // nucleolus // inferred from direct assay /// 0…	0000166 // nucleotide binding // inferred from electronic annotation /// 0005515 // protein binding // inferred from physical interaction /// 0005524 // ATP binding // inferred from electronic annotation /// 0008022 // protein C-terminus binding // inferred from physical interaction	---
201291_s_at	TOP2A	2.89759	1.5773	0.544349	2.98411	0	7.51426	10.1819	9.81866	11.7931	11.362	1.5773	2.98411	0.0304726	AU159942	topoisomerase (DNA) II alpha 170kDa	TOP2A	NM_001067	0006259 // DNA metabolic process // inferred from electronic annotation /// 0006260 // DNA replication // non-traceable author statement /// 0006265 // DNA topological change // inferred from electronic annotation /// 0006266 // DNA ligation // inferred from direct assay /// 0006281 // DNA repair // non-traceable author statement /// 0006355 // regulation of transcription, DNA-dependent // inferr…	0000228 // nuclear chromosome // inferred from direct assay /// 0005634 // nucleus // inferred from direct assay /// 0005634 // nucleus // inferred from electronic annotation /// 0005654 // nucleoplasm // inferred from direct assay /// 0005654 // nucleoplasm // inferred from electronic annotation /// 0005694 // chromosome // inferred from electronic annotation /// 0005730 // nucleolus // inferred…	0000166 // nucleotide binding // inferred from electronic annotation /// 0003677 // DNA binding // inferred from direct assay /// 0003677 // DNA binding // inferred from electronic annotation /// 0003682 // chromatin binding // inferred from direct assay /// 0003700 // sequence-specific DNA binding transcription factor activity // inferred from electronic annotation /// 0003916 // DNA topoisomera…	---
222962_s_at	MCM10	2.88876	1.57667	0.545796	2.98281	0	7.59425	7.18939	7.48386	9.15529	8.6713	1.57667	2.98281	0.0307952	AB042719	minichromosome maintenance complex component 10	MCM10	NM_018518 /// NM_182751	0006260 // DNA replication // not recorded /// 0006260 // DNA replication // inferred from electronic annotation	0005634 // nucleus // inferred from direct assay /// 0005634 // nucleus // inferred from electronic annotation /// 0005654 // nucleoplasm // not recorded	0005515 // protein binding // inferred from physical interaction /// 0046872 // metal ion binding // inferred from electronic annotation	---
209406_at	BAG2	3.28941	1.57372	0.478421	2.97672	0	4.38841	9.1404	9.03166	10.8687	10.4508	1.57372	2.97672	0.0183049	AF095192	BCL2-associated athanogene 2	BAG2	NM_004282	0006457 // protein folding // traceable author statement /// 0006915 // apoptosis // inferred from electronic annotation /// 0019538 // protein metabolic process // inferred from direct assay	---	0005515 // protein binding // inferred from physical interaction /// 0005515 // protein binding // inferred from electronic annotation	---
202309_at	MTHFD1	4.38577	1.5725	0.358546	2.97419	0	0	9.9214	10.0721	11.6288	11.5097	1.5725	2.97419	0.00370771	NM_005956	methylenetetrahydrofolate dehydrogenase (NADP+ dependent) 1, methenyltetrahydrofolate cyclohydrolase, formyltetrahydrofolate synthetase	MTHFD1	NM_005956	0000105 // histidine biosynthetic process // inferred from electronic annotation /// 0006164 // purine nucleotide biosynthetic process // inferred from electronic annotation /// 0006548 // histidine catabolic process // inferred from electronic annotation /// 0006730 // one-carbon metabolic process // inferred from electronic annotation /// 0008152 // metabolic process // inferred from electronic…	0005737 // cytoplasm // inferred from direct assay /// 0005737 // cytoplasm // inferred from electronic annotation /// 0005739 // mitochondrion // inferred from electronic annotation /// 0005739 // mitochondrion // traceable author statement	0000166 // nucleotide binding // inferred from electronic annotation /// 0003824 // catalytic activity // inferred from electronic annotation /// 0004329 // formate-tetrahydrofolate ligase activity // inferred from electronic annotation /// 0004329 // formate-tetrahydrofolate ligase activity // traceable author statement /// 0004477 // methenyltetrahydrofolate cyclohydrolase activity // inferred …	---
202613_at	CTPS	3.07974	1.5705	0.509946	2.97007	0	5.9587	8.39297	8.86206	10.2768	10.1192	1.5705	2.97007	0.0239318	NM_001905	CTP synthase	CTPS	NM_001905	0006139 // nucleobase, nucleoside, nucleotide and nucleic acid metabolic process // traceable author statement /// 0006221 // pyrimidine nucleotide biosynthetic process // inferred from electronic annotation /// 0006241 // CTP biosynthetic process // inferred from direct assay /// 0006541 // glutamine metabolic process // inferred from electronic annotation /// 0042493 // response to drug // trac…	---	0000166 // nucleotide binding // inferred from electronic annotation /// 0003824 // catalytic activity // inferred from electronic annotation /// 0003883 // CTP synthase activity // inferred from direct assay /// 0003883 // CTP synthase activity // inferred from genetic interaction /// 0003883 // CTP synthase activity // inferred from electronic annotation /// 0003883 // CTP synthase activity // …	---
226936_at	CENPW	4.57747	1.56873	0.342707	2.96644	0	0	9.31957	9.47006	10.9912	10.9359	1.56873	2.96644	0.00260215	BG492359	centromere protein W	CENPW	NM_001012507	---	0000775 // chromosome, centromeric region // inferred from electronic annotation /// 0005634 // nucleus // inferred from electronic annotation	0003677 // DNA binding // inferred from electronic annotation	---
205433_at	BCHE	3.18763	1.5634	0.490458	2.9555	0	5.12169	8.63709	8.37475	10.2557	9.88292	1.5634	2.9555	0.0206007	NM_000055	butyrylcholinesterase	BCHE	NM_000055	0007584 // response to nutrient // inferred from electronic annotation /// 0007612 // learning // inferred from electronic annotation /// 0019695 // choline metabolic process // inferred from electronic annotation /// 0042493 // response to drug // inferred from electronic annotation /// 0043279 // response to alkaloid // inferred from electronic annotation /// 0050783 // cocaine metabolic proces…	0005576 // extracellular region // non-traceable author statement /// 0005576 // extracellular region // inferred from electronic annotation /// 0005615 // extracellular space // inferred from electronic annotation /// 0005624 // membrane fraction // inferred from electronic annotation /// 0005641 // nuclear envelope lumen // inferred from electronic annotation /// 0005783 // endoplasmic reticulu…	0001540 // beta-amyloid binding // non-traceable author statement /// 0003824 // catalytic activity // non-traceable author statement /// 0003990 // acetylcholinesterase activity // inferred from sequence or structural similarity /// 0003990 // acetylcholinesterase activity // inferred from electronic annotation /// 0004091 // carboxylesterase activity // inferred from electronic annotation /// 0…	Irinotecan_pathway_PharmGKB // GenMAPP
1555812_a_at	ARHGDIB	3.46616	1.55997	0.450058	2.94849	0	3.24113	10.1264	10.3573	11.6541	11.9496	1.55998	2.94849	0.0141455	AF498927	Rho GDP dissociation inhibitor (GDI) beta	ARHGDIB	NM_001175	0006928 // cellular component movement // traceable author statement /// 0006955 // immune response // traceable author statement /// 0007162 // negative regulation of cell adhesion // traceable author statement /// 0007266 // Rho protein signal transduction // traceable author statement /// 0007275 // multicellular organismal development // traceable author statement /// 0030036 // actin cytoske…	0005737 // cytoplasm // traceable author statement /// 0005737 // cytoplasm // inferred from electronic annotation /// 0005856 // cytoskeleton // traceable author statement /// 0016023 // cytoplasmic membrane-bounded vesicle // traceable author statement	0005094 // Rho GDP-dissociation inhibitor activity // inferred from electronic annotation /// 0005094 // Rho GDP-dissociation inhibitor activity // traceable author statement /// 0005096 // GTPase activator activity // inferred from electronic annotation /// 0005515 // protein binding // inferred from electronic annotation	G13_Signaling_Pathway // GenMAPP
201008_s_at	TXNIP	3.67955	1.55927	0.423768	2.94706	0	2.05819	7.22293	7.48167	9.00781	8.81534	1.55928	2.94706	0.0105246	AA812232	thioredoxin interacting protein	TXNIP	NM_006472	0000122 // negative regulation of transcription from RNA polymerase II promoter // inferred from electronic annotation /// 0006350 // transcription // inferred from electronic annotation /// 0006606 // protein import into nucleus // inferred from electronic annotation /// 0006979 // response to oxidative stress // inferred from electronic annotation /// 0007049 // cell cycle // inferred from elec…	0005634 // nucleus // inferred from electronic annotation /// 0005737 // cytoplasm // inferred from direct assay /// 0005737 // cytoplasm // inferred from electronic annotation /// 0005758 // mitochondrial intermembrane space // inferred from electronic annotation	0004857 // enzyme inhibitor activity // inferred from electronic annotation /// 0005515 // protein binding // inferred from physical interaction /// 0005515 // protein binding // inferred from electronic annotation /// 0031625 // ubiquitin protein ligase binding // inferred from physical interaction	---
228347_at	SIX1	3.86893	1.55905	0.402967	2.94661	0	1.18094	8.09077	8.23783	9.843	9.6037	1.55905	2.94661	0.00801699	N79004	SIX homeobox 1	SIX1	NM_005982	0001657 // ureteric bud development // inferred from sequence or structural similarity /// 0001657 // ureteric bud development // inferred from electronic annotation /// 0001658 // branching involved in ureteric bud morphogenesis // inferred from sequence or structural similarity /// 0001658 // branching involved in ureteric bud morphogenesis // inferred from electronic annotation /// 0001759 // …	0005634 // nucleus // inferred from direct assay /// 0005634 // nucleus // inferred from electronic annotation /// 0005667 // transcription factor complex // inferred from electronic annotation /// 0005730 // nucleolus // inferred from direct assay /// 0005737 // cytoplasm // inferred from direct assay	0003677 // DNA binding // inferred from direct assay /// 0003677 // DNA binding // inferred from electronic annotation /// 0003682 // chromatin binding // inferred from electronic annotation /// 0003700 // sequence-specific DNA binding transcription factor activity // inferred from sequence or structural similarity /// 0003700 // sequence-specific DNA binding transcription factor activity // infe…	---
218073_s_at	TMEM48	3.46255	1.55829	0.450042	2.94505	0	3.26301	8.13802	8.20625	9.91481	9.54604	1.55829	2.94505	0.014173	NM_018087	transmembrane protein 48	TMEM48	NM_001168551 /// NM_018087 /// NR_033142	0006810 // transport // inferred from electronic annotation /// 0015031 // protein transport // non-traceable author statement /// 0015031 // protein transport // inferred from electronic annotation /// 0031081 // nuclear pore distribution // inferred from mutant phenotype /// 0051028 // mRNA transport // inferred from electronic annotation /// 0051292 // nuclear pore complex assembly // inferred…	0005634 // nucleus // inferred from electronic annotation /// 0005643 // nuclear pore // inferred from direct assay /// 0005643 // nuclear pore // inferred from electronic annotation /// 0016020 // membrane // inferred from electronic annotation /// 0016021 // integral to membrane // inferred from electronic annotation /// 0031965 // nuclear membrane // inferred from electronic annotation	0005515 // protein binding // inferred from physical interaction /// 0005515 // protein binding // inferred from electronic annotation /// 0017056 // structural constituent of nuclear pore // inferred from mutant phenotype	---
226279_at	PRSS23	4.30097	1.55524	0.361602	2.93882	0	0	9.34536	9.48303	11.0407	10.8982	1.55524	2.93882	0.0040336	AW471145	protease, serine, 23	PRSS23	NM_007173	0006508 // proteolysis // inferred from electronic annotation	0005576 // extracellular region // inferred from electronic annotation /// 0005634 // nucleus // inferred from direct assay	0003824 // catalytic activity // inferred from electronic annotation /// 0004252 // serine-type endopeptidase activity // inferred from electronic annotation /// 0008233 // peptidase activity // inferred from electronic annotation /// 0008236 // serine-type peptidase activity // inferred from electronic annotation /// 0016787 // hydrolase activity // inferred from electronic annotation	---
202350_s_at	MATN2	2.5983	1.55283	0.597633	2.93392	0	10.458	5.68142	5.17792	7.20368	6.76133	1.55283	2.93392	0.0435511	NM_002380	matrilin 2	MATN2	NM_002380 /// NM_030583	---	0005576 // extracellular region // inferred from electronic annotation /// 0005578 // proteinaceous extracellular matrix // non-traceable author statement /// 0005578 // proteinaceous extracellular matrix // inferred from electronic annotation /// 0031012 // extracellular matrix // inferred from direct assay	0005509 // calcium ion binding // inferred from electronic annotation	---
1555274_a_at	EPT1	3.98822	1.53806	0.385651	2.90404	0	0.706216	7.16994	7.31186	8.87958	8.67834	1.53806	2.90404	0.00634728	BC021229	ethanolaminephosphotransferase 1 (CDP-ethanolamine-specific)	EPT1	NM_033505	0008654 // phospholipid biosynthetic process // inferred from electronic annotation	0016020 // membrane // inferred from electronic annotation /// 0016021 // integral to membrane // inferred from electronic annotation	0004307 // ethanolaminephosphotransferase activity // inferred from electronic annotation /// 0016740 // transferase activity // inferred from electronic annotation /// 0016780 // phosphotransferase activity, for other substituted phosphate groups // inferred from electronic annotation /// 0046872 // metal ion binding // inferred from electronic annotation	---
217834_s_at	SYNCRIP	4.81491	1.53775	0.319373	2.90341	0	0	9.53415	9.55768	11.0281	11.1393	1.53775	2.90341	0.00136372	NM_006372	synaptotagmin binding, cytoplasmic RNA interacting protein	SYNCRIP	NM_001159673 /// NM_001159674 /// NM_001159675 /// NM_001159676 /// NM_001159677 /// NM_006372	0006396 // RNA processing // traceable author statement /// 0006397 // mRNA processing // inferred from electronic annotation /// 0008380 // RNA splicing // inferred from electronic annotation /// 0008380 // RNA splicing // traceable author statement /// 0044419 // interspecies interaction between organisms // inferred from electronic annotation /// 0070934 // CRD-mediated mRNA stabilization // i…	0005634 // nucleus // inferred from electronic annotation /// 0005634 // nucleus // traceable author statement /// 0005654 // nucleoplasm // inferred from electronic annotation /// 0005681 // spliceosomal complex // inferred from electronic annotation /// 0005737 // cytoplasm // inferred from electronic annotation /// 0005783 // endoplasmic reticulum // inferred from electronic annotation /// 000…	0000166 // nucleotide binding // inferred from electronic annotation /// 0003676 // nucleic acid binding // inferred from electronic annotation /// 0003723 // RNA binding // inferred from electronic annotation /// 0003723 // RNA binding // traceable author statement /// 0005515 // protein binding // inferred from physical interaction /// 0008143 // poly(A) RNA binding // inferred from electronic …	---
202580_x_at	FOXM1	3.41588	1.53676	0.449887	2.90142	0	3.55158	8.18701	8.47601	9.98753	9.74901	1.53676	2.90142	0.0145407	NM_021953	forkhead box M1	FOXM1	NM_021953 /// NM_202002 /// NM_202003	0001558 // regulation of cell growth // traceable author statement /// 0001570 // vasculogenesis // inferred from sequence or structural similarity /// 0001889 // liver development // inferred from sequence or structural similarity /// 0006350 // transcription // inferred from electronic annotation /// 0006355 // regulation of transcription, DNA-dependent // inferred from electronic annotation //…	0005634 // nucleus // inferred from electronic annotation /// 0005667 // transcription factor complex // inferred from sequence or structural similarity	0003677 // DNA binding // inferred from direct assay /// 0003677 // DNA binding // traceable author statement /// 0003677 // DNA binding // inferred from electronic annotation /// 0003690 // double-stranded DNA binding // inferred from sequence or structural similarity /// 0003700 // sequence-specific DNA binding transcription factor activity // inferred from direct assay /// 0003700 // sequence-…	---
1552489_s_at	MPP4	3.80728	1.53295	0.402637	2.89377	0	1.44949	6.82754	6.98708	8.55545	8.32508	1.53295	2.89377	0.00825045	NM_033066	membrane protein, palmitoylated 4 (MAGUK p55 subfamily member 4)	MPP4	NM_033066	---	0005737 // cytoplasm // inferred from electronic annotation	0005515 // protein binding // inferred from physical interaction /// 0005515 // protein binding // inferred from electronic annotation	---
209598_at	PNMA2	3.80899	1.52684	0.400851	2.88154	0	1.4418	7.1393	7.25953	8.85083	8.60168	1.52684	2.88154	0.00810774	AB020690	paraneoplastic antigen MA2	PNMA2	NM_007257	---	0005634 // nucleus // inferred from electronic annotation /// 0005730 // nucleolus // inferred from electronic annotation	0005515 // protein binding // inferred from physical interaction	---
204822_at	TTK	2.62445	1.52159	0.579774	2.87107	0	10.182	7.81332	7.64436	9.55622	8.94463	1.52159	2.87107	0.0408274	NM_003318	TTK protein kinase	TTK	NM_001166691 /// NM_003318	0006468 // protein phosphorylation // inferred from electronic annotation /// 0007051 // spindle organization // traceable author statement /// 0007052 // mitotic spindle organization // traceable author statement /// 0007094 // mitotic cell cycle spindle assembly checkpoint // traceable author statement /// 0008284 // positive regulation of cell proliferation // traceable author statement /// 00…	0005819 // spindle // traceable author statement	0000166 // nucleotide binding // inferred from electronic annotation /// 0004672 // protein kinase activity // inferred from electronic annotation /// 0004674 // protein serine/threonine kinase activity // inferred from electronic annotation /// 0004674 // protein serine/threonine kinase activity // traceable author statement /// 0004713 // protein tyrosine kinase activity // inferred from electr…	---
221436_s_at	CDCA3	3.59759	1.51419	0.420892	2.85639	0	2.48734	8.97431	8.77603	10.2659	10.5129	1.51419	2.85639	0.010762	NM_031299	cell division cycle associated 3	CDCA3	NM_031299	0007049 // cell cycle // inferred from electronic annotation /// 0007067 // mitosis // inferred from electronic annotation /// 0051301 // cell division // inferred from electronic annotation	0005737 // cytoplasm // inferred from electronic annotation /// 0005829 // cytosol // inferred from electronic annotation	---	---
212949_at	NCAPH	3.97757	1.49718	0.376406	2.8229	0	0.746256	8.07257	8.26892	9.72562	9.61022	1.49718	2.8229	0.00573568	D38553	non-SMC condensin I complex, subunit H	NCAPH	NM_015341	0000278 // mitotic cell cycle // inferred from electronic annotation /// 0007049 // cell cycle // inferred from electronic annotation /// 0007067 // mitosis // inferred from electronic annotation /// 0007076 // mitotic chromosome condensation // inferred from direct assay /// 0030261 // chromosome condensation // inferred from electronic annotation /// 0051301 // cell division // inferred from el…	0000796 // condensin complex // inferred from direct assay /// 0005634 // nucleus // inferred from electronic annotation /// 0005737 // cytoplasm // inferred from electronic annotation	---	---
204510_at	CDC7	3.63233	1.49399	0.411302	2.81666	0	2.30165	7.13689	7.23177	8.81932	8.53731	1.49399	2.81666	0.00977151	NM_003503	cell division cycle 7 homolog (S. cerevisiae)	CDC7	NM_001134419 /// NM_001134420 /// NM_003503	0000082 // G1/S transition of mitotic cell cycle // traceable author statement /// 0006260 // DNA replication // not recorded /// 0006468 // protein phosphorylation // inferred from electronic annotation /// 0007049 // cell cycle // inferred from electronic annotation /// 0008284 // positive regulation of cell proliferation // inferred from mutant phenotype /// 0033261 // regulation of S phase //…	0005634 // nucleus // inferred from direct assay /// 0005634 // nucleus // inferred from electronic annotation /// 0005654 // nucleoplasm // not recorded /// 0005737 // cytoplasm // inferred from direct assay	0000166 // nucleotide binding // inferred from electronic annotation /// 0004672 // protein kinase activity // inferred from electronic annotation /// 0004674 // protein serine/threonine kinase activity // inferred from electronic annotation /// 0005515 // protein binding // inferred from physical interaction /// 0005524 // ATP binding // inferred from electronic annotation /// 0016301 // kinase …	Cell_cycle_KEGG // GenMAPP /// DNA_replication_Reactome // GenMAPP
223258_s_at	G2E3	2.52469	1.48712	0.589032	2.8033	0.0391894	11.2547	6.72826	6.14335	8.0681	7.77775	1.48712	2.8033	0.0449769	BC000973	G2/M-phase specific E3 ubiquitin protein ligase	G2E3	NM_017769	0000209 // protein polyubiquitination // inferred from electronic annotation /// 0001824 // blastocyst development // inferred from electronic annotation /// 0006464 // protein modification process // inferred from electronic annotation /// 0006915 // apoptosis // inferred from electronic annotation /// 0007275 // multicellular organismal development // inferred from electronic annotation /// 004…	0005622 // intracellular // inferred from electronic annotation /// 0005634 // nucleus // inferred from electronic annotation /// 0005730 // nucleolus // inferred from electronic annotation /// 0005737 // cytoplasm // inferred from direct assay /// 0005737 // cytoplasm // inferred from electronic annotation /// 0005794 // Golgi apparatus // inferred from direct assay /// 0043231 // intracellular …	0004842 // ubiquitin-protein ligase activity // inferred from electronic annotation /// 0005515 // protein binding // inferred from physical interaction /// 0005515 // protein binding // inferred from electronic annotation /// 0008270 // zinc ion binding // inferred from electronic annotation /// 0016874 // ligase activity // inferred from electronic annotation /// 0016881 // acid-amino acid liga…	---
218039_at	NUSAP1	4.30157	1.47749	0.343477	2.78464	0	0	9.11912	9.24644	10.7103	10.6103	1.47749	2.78464	0.00298832	NM_016359	nucleolar and spindle associated protein 1	NUSAP1	NM_001129897 /// NM_016359 /// NM_018454	0000070 // mitotic sister chromatid segregation // inferred from direct assay /// 0000281 // cytokinesis after mitosis // inferred from direct assay /// 0007049 // cell cycle // inferred from electronic annotation /// 0007067 // mitosis // inferred from electronic annotation /// 0007076 // mitotic chromosome condensation // inferred from direct assay /// 0040001 // establishment of mitotic spindl…	0005634 // nucleus // inferred from electronic annotation /// 0005730 // nucleolus // inferred from electronic annotation /// 0005737 // cytoplasm // inferred from electronic annotation /// 0005819 // spindle // inferred from electronic annotation /// 0005856 // cytoskeleton // inferred from electronic annotation /// 0005874 // microtubule // inferred from electronic annotation /// 0005876 // spi…	0003677 // DNA binding // inferred from electronic annotation /// 0008017 // microtubule binding // inferred from electronic annotation	---
242324_x_at	CCBE1	4.07107	1.47439	0.362163	2.77866	0	0.409751	7.8828	7.80765	9.41189	9.22734	1.47439	2.77866	0.00453566	AA740403	collagen and calcium binding EGF domains 1	CCBE1	NM_133459	0001525 // angiogenesis // inferred from electronic annotation /// 0001946 // lymphangiogenesis // inferred from mutant phenotype /// 0001946 // lymphangiogenesis // inferred from sequence or structural similarity /// 0002040 // sprouting angiogenesis // inferred from sequence or structural similarity /// 0007275 // multicellular organismal development // inferred from electronic annotation /// 0…	0005576 // extracellular region // inferred from electronic annotation	0005509 // calcium ion binding // inferred from electronic annotation	---
218308_at	TACC3	3.80079	1.47176	0.387224	2.77359	0	1.47868	8.7911	8.78106	10.3824	10.1332	1.47176	2.77359	0.00710212	NM_006342	transforming, acidic coiled-coil containing protein 3	TACC3	NM_006342	0000226 // microtubule cytoskeleton organization // inferred from electronic annotation /// 0006950 // response to stress // inferred from electronic annotation /// 0008283 // cell proliferation // inferred from electronic annotation /// 0021987 // cerebral cortex development // inferred from electronic annotation /// 0022008 // neurogenesis // inferred from electronic annotation /// 0022027 // i…	0005737 // cytoplasm // inferred from electronic annotation	0019904 // protein domain specific binding // inferred from electronic annotation	---
201292_at	TOP2A	3.76309	1.47027	0.390709	2.77074	0	1.65196	9.43259	9.37204	10.9971	10.748	1.47027	2.77074	0.00751516	AL561834	topoisomerase (DNA) II alpha 170kDa	TOP2A	NM_001067	0006259 // DNA metabolic process // inferred from electronic annotation /// 0006260 // DNA replication // non-traceable author statement /// 0006265 // DNA topological change // inferred from electronic annotation /// 0006266 // DNA ligation // inferred from direct assay /// 0006281 // DNA repair // non-traceable author statement /// 0006355 // regulation of transcription, DNA-dependent // inferr…	0000228 // nuclear chromosome // inferred from direct assay /// 0005634 // nucleus // inferred from direct assay /// 0005634 // nucleus // inferred from electronic annotation /// 0005654 // nucleoplasm // inferred from direct assay /// 0005654 // nucleoplasm // inferred from electronic annotation /// 0005694 // chromosome // inferred from electronic annotation /// 0005730 // nucleolus // inferred…	0000166 // nucleotide binding // inferred from electronic annotation /// 0003677 // DNA binding // inferred from direct assay /// 0003677 // DNA binding // inferred from electronic annotation /// 0003682 // chromatin binding // inferred from direct assay /// 0003700 // sequence-specific DNA binding transcription factor activity // inferred from electronic annotation /// 0003916 // DNA topoisomera…	---
208845_at	VDAC3	4.57958	1.46856	0.320675	2.76745	0	0	10.0122	9.89658	11.4168	11.4291	1.46856	2.76745	0.00156411	BC002456	voltage-dependent anion channel 3	VDAC3	NM_001135694 /// NM_005662	0006810 // transport // inferred from electronic annotation /// 0006811 // ion transport // inferred from electronic annotation /// 0006820 // anion transport // inferred from electronic annotation /// 0015853 // adenine transport // traceable author statement /// 0055085 // transmembrane transport // inferred from electronic annotation	0005739 // mitochondrion // inferred from electronic annotation /// 0005741 // mitochondrial outer membrane // inferred from electronic annotation /// 0005741 // mitochondrial outer membrane // traceable author statement /// 0016020 // membrane // inferred from electronic annotation /// 0016021 // integral to membrane // inferred from electronic annotation /// 0046930 // pore complex // inferred …	0000166 // nucleotide binding // inferred from electronic annotation /// 0005515 // protein binding // inferred from physical interaction /// 0008308 // voltage-gated anion channel activity // traceable author statement /// 0008308 // voltage-gated anion channel activity // inferred from electronic annotation /// 0015288 // porin activity // inferred from electronic annotation	---
208977_x_at	TUBB2C	4.15403	1.46209	0.351968	2.75506	0	0.138844	11.7054	11.8643	13.2881	13.2058	1.46209	2.75506	0.0037213	BC004188	tubulin, beta 2C	TUBB2C	NM_006088	0006928 // cellular component movement // traceable author statement /// 0007017 // microtubule-based process // inferred from electronic annotation /// 0007018 // microtubule-based movement // inferred from electronic annotation /// 0042267 // natural killer cell mediated cytotoxicity // non-traceable author statement /// 0051258 // protein polymerization // inferred from electronic annotation	0005829 // cytosol // not recorded /// 0005856 // cytoskeleton // traceable author statement /// 0005874 // microtubule // inferred from electronic annotation /// 0043234 // protein complex // inferred from electronic annotation	0000166 // nucleotide binding // inferred from electronic annotation /// 0003924 // GTPase activity // inferred from electronic annotation /// 0005198 // structural molecule activity // inferred from electronic annotation /// 0005525 // GTP binding // inferred from electronic annotation /// 0042288 // MHC class I protein binding // traceable author statement /// 0051082 // unfolded protein bindin…	---
235113_at	PPIL5	3.39619	1.46175	0.43041	2.75443	0	3.67658	8.47859	8.4092	10.0699	9.74139	1.46175	2.75443	0.0129352	AA742244	peptidylprolyl isomerase (cyclophilin)-like 5	PPIL5	NM_152329 /// NM_203467	---	---	0005515 // protein binding // inferred from electronic annotation /// 0016853 // isomerase activity // inferred from electronic annotation	---
211762_s_at	KPNA2	5.13431	1.46073	0.284504	2.75249	0	0	11.6203	11.6484	13.0781	13.112	1.46073	2.75249	0.000226279	BC005978	karyopherin alpha 2 (RAG cohort 1, importin alpha 1)	KPNA2	NM_002266	0000018 // regulation of DNA recombination // traceable author statement /// 0000072 // M phase specific microtubule process // traceable author statement /// 0000085 // G2 phase of mitotic cell cycle // traceable author statement /// 0006259 // DNA metabolic process // traceable author statement /// 0006606 // protein import into nucleus // inferred from electronic annotation /// 0006607 // NLS-…	0005634 // nucleus // inferred from electronic annotation /// 0005634 // nucleus // traceable author statement /// 0005643 // nuclear pore // inferred from electronic annotation /// 0005654 // nucleoplasm // traceable author statement /// 0005737 // cytoplasm // inferred from electronic annotation /// 0005737 // cytoplasm // traceable author statement	0005488 // binding // inferred from electronic annotation /// 0005515 // protein binding // inferred from physical interaction /// 0008139 // nuclear localization sequence binding // traceable author statement /// 0008565 // protein transporter activity // inferred from electronic annotation /// 0042826 // histone deacetylase binding // inferred from physical interaction	---
1552521_a_at	TMEM74	2.33779	1.45815	0.623731	2.74756	0.0523603	13.4034	5.36939	5.07878	7.01293	6.35155	1.45815	2.74756	0.0562356	BC030710	transmembrane protein 74	TMEM74	NM_153015	0006914 // autophagy // inferred from electronic annotation	0000421 // autophagic vacuole membrane // inferred from electronic annotation /// 0005764 // lysosome // inferred from electronic annotation /// 0005765 // lysosomal membrane // inferred from electronic annotation /// 0016020 // membrane // inferred from electronic annotation /// 0016021 // integral to membrane // inferred from electronic annotation /// 0031410 // cytoplasmic vesicle // inferred …	---	---
219787_s_at	ECT2	2.47298	1.45811	0.589614	2.74748	0.0391894	11.8311	9.30598	9.08511	10.9615	10.3458	1.45811	2.74748	0.0468153	NM_018098	epithelial cell transforming sequence 2 oncogene	ECT2	NM_018098	0000902 // cell morphogenesis // inferred from electronic annotation /// 0006915 // apoptosis // not recorded /// 0008624 // induction of apoptosis by extracellular signals // not recorded /// 0035023 // regulation of Rho protein signal transduction // inferred from electronic annotation /// 0043123 // positive regulation of I-kappaB kinase/NF-kappaB cascade // inferred from mutant phenotype	0005622 // intracellular // inferred from electronic annotation /// 0005829 // cytosol // not recorded	0004871 // signal transducer activity // inferred from mutant phenotype /// 0005085 // guanyl-nucleotide exchange factor activity // not recorded /// 0005085 // guanyl-nucleotide exchange factor activity // inferred from electronic annotation /// 0005089 // Rho guanyl-nucleotide exchange factor activity // inferred from electronic annotation /// 0005515 // protein binding // inferred from physica…	---
208846_s_at	VDAC3	3.76529	1.45298	0.385887	2.73772	0	1.64168	9.51536	9.53976	11.1033	10.8578	1.45298	2.73772	0.00713124	U90943	voltage-dependent anion channel 3	VDAC3	NM_001135694 /// NM_005662	0006810 // transport // inferred from electronic annotation /// 0006811 // ion transport // inferred from electronic annotation /// 0006820 // anion transport // inferred from electronic annotation /// 0015853 // adenine transport // traceable author statement /// 0055085 // transmembrane transport // inferred from electronic annotation	0005739 // mitochondrion // inferred from electronic annotation /// 0005741 // mitochondrial outer membrane // inferred from electronic annotation /// 0005741 // mitochondrial outer membrane // traceable author statement /// 0016020 // membrane // inferred from electronic annotation /// 0016021 // integral to membrane // inferred from electronic annotation /// 0046930 // pore complex // inferred …	0000166 // nucleotide binding // inferred from electronic annotation /// 0005515 // protein binding // inferred from physical interaction /// 0008308 // voltage-gated anion channel activity // traceable author statement /// 0008308 // voltage-gated anion channel activity // inferred from electronic annotation /// 0015288 // porin activity // inferred from electronic annotation	---
224589_at	XIST	2.84353	1.45294	0.510964	2.73766	0	8.01052	4.64477	4.69265	6.36894	5.87437	1.45294	2.73766	0.0280143	BF223193	X (inactive)-specific transcript (non-protein coding)	XIST	NR_001564	---	---	---	---
213599_at	OIP5	4.79035	1.44956	0.302601	2.73125	0	0	7.88481	7.96393	9.36753	9.38034	1.44956	2.73125	0.000763368	BE045993	Opa interacting protein 5	OIP5	NM_007280	0007049 // cell cycle // inferred from electronic annotation /// 0007067 // mitosis // inferred from electronic annotation /// 0007154 // cell communication // non-traceable author statement /// 0051301 // cell division // inferred from electronic annotation	0000775 // chromosome, centromeric region // inferred from electronic annotation /// 0000785 // chromatin // inferred from direct assay /// 0005634 // nucleus // inferred from direct assay /// 0005634 // nucleus // inferred from electronic annotation /// 0010369 // chromocenter // inferred from electronic annotation /// 0015030 // Cajal body // inferred from direct assay	0005515 // protein binding // inferred from physical interaction	---
221730_at	COL5A2	3.79377	1.44935	0.382033	2.73085	0	1.51046	6.61843	6.75042	8.23341	8.03414	1.44935	2.73085	0.00673026	NM_000393	collagen, type V, alpha 2	COL5A2	NM_000393	0001501 // skeletal system development // inferred from electronic annotation /// 0001503 // ossification // inferred from electronic annotation /// 0007165 // signal transduction // inferred from electronic annotation /// 0030199 // collagen fibril organization // inferred from mutant phenotype /// 0030199 // collagen fibril organization // inferred from sequence or structural similarity /// 003…	0005576 // extracellular region // inferred from electronic annotation /// 0005578 // proteinaceous extracellular matrix // inferred from electronic annotation /// 0005581 // collagen // inferred from electronic annotation /// 0005588 // collagen type V // inferred from mutant phenotype /// 0031012 // extracellular matrix // non-traceable author statement	0005102 // receptor binding // inferred from electronic annotation /// 0005201 // extracellular matrix structural constituent // inferred from electronic annotation /// 0046332 // SMAD binding // inferred from electronic annotation	---	COL5A2	collagen, type V, alpha 2
218622_at	NUP37	4.21824	1.44876	0.343451	2.72973	0	0	9.80052	9.64128	11.1841	11.1552	1.44876	2.72973	0.00310549	NM_024057	nucleoporin 37kDa	NUP37	NM_024057	0006810 // transport // inferred from electronic annotation /// 0007049 // cell cycle // inferred from electronic annotation /// 0007059 // chromosome segregation // inferred from electronic annotation /// 0007067 // mitosis // inferred from electronic annotation /// 0015031 // protein transport // inferred from electronic annotation /// 0051028 // mRNA transport // inferred from electronic annot…	0000775 // chromosome, centromeric region // inferred from electronic annotation /// 0000776 // kinetochore // inferred from direct assay /// 0000776 // kinetochore // inferred from electronic annotation /// 0000777 // condensed chromosome kinetochore // inferred from electronic annotation /// 0005634 // nucleus // inferred from electronic annotation /// 0005635 // nuclear envelope // not recorde…	0005515 // protein binding // inferred from physical interaction	---
228273_at	PRR11	4.11038	1.44716	0.352074	2.72671	0	0.278207	10.8627	10.7983	12.3612	12.1941	1.44716	2.72671	0.00380697	BG165011	proline rich 11	PRR11	NM_018304	---	---	---	---
209160_at	AKR1C3	4.07616	1.44649	0.354866	2.72544	0	0.392409	8.89376	8.76678	10.3438	10.2097	1.44649	2.72544	0.00405031	AB018580	aldo-keto reductase family 1, member C3 (3-alpha hydroxysteroid dehydrogenase, type II)	AKR1C3	NM_003739	0006693 // prostaglandin metabolic process // traceable author statement /// 0055114 // oxidation reduction // traceable author statement /// 0055114 // oxidation reduction // inferred from electronic annotation	0005622 // intracellular // inferred from direct assay /// 0005737 // cytoplasm // inferred from electronic annotation	0004033 // aldo-keto reductase activity // traceable author statement /// 0016491 // oxidoreductase activity // inferred from electronic annotation /// 0047017 // prostaglandin-F synthase activity // inferred from electronic annotation /// 0047026 // 3-alpha-hydroxysteroid dehydrogenase (A-specific) activity // inferred from electronic annotation /// 0047045 // testosterone 17-beta-dehydrogenase …	---
218566_s_at	CHORDC1	2.57522	1.44112	0.55961	2.71531	0.0391894	10.7048	9.32171	8.92571	10.7863	10.3433	1.44112	2.71531	0.0399663	NM_012124	cysteine and histidine-rich domain (CHORD)-containing 1	CHORDC1	NM_001144073 /// NM_012124	---	---	0008270 // zinc ion binding // inferred from electronic annotation /// 0042802 // identical protein binding // inferred from physical interaction /// 0046872 // metal ion binding // inferred from electronic annotation	---
218663_at	NCAPG	2.64502	1.43403	0.54216	2.70199	0	9.9672	8.49597	8.2953	10.0907	9.56865	1.43402	2.70199	0.0359845	NM_022346	non-SMC condensin I complex, subunit G	NCAPG	NM_022346	0007049 // cell cycle // inferred from electronic annotation /// 0007067 // mitosis // inferred from electronic annotation /// 0007076 // mitotic chromosome condensation // inferred from direct assay /// 0007076 // mitotic chromosome condensation // non-traceable author statement /// 0030261 // chromosome condensation // inferred from electronic annotation /// 0051301 // cell division // inferred…	0000796 // condensin complex // inferred from direct assay /// 0005634 // nucleus // non-traceable author statement /// 0005634 // nucleus // inferred from electronic annotation /// 0005737 // cytoplasm // inferred from electronic annotation	0005488 // binding // inferred from electronic annotation /// 0005515 // protein binding // inferred from physical interaction	---
219778_at	ZFPM2	2.79475	1.42979	0.511599	2.69408	0	8.47188	7.13863	6.84612	8.62377	8.22056	1.42979	2.69408	0.0290311	NM_012082	zinc finger protein, multitype 2	ZFPM2	NM_012082	0000122 // negative regulation of transcription from RNA polymerase II promoter // inferred from electronic annotation /// 0001570 // vasculogenesis // inferred from electronic annotation /// 0001701 // in utero embryonic development // inferred from electronic annotation /// 0006350 // transcription // inferred from electronic annotation /// 0006357 // regulation of transcription from RNA polyme…	0005622 // intracellular // inferred from electronic annotation /// 0005634 // nucleus // inferred from electronic annotation /// 0005737 // cytoplasm // inferred from electronic annotation	0003676 // nucleic acid binding // inferred from electronic annotation /// 0003677 // DNA binding // inferred from electronic annotation /// 0003702 // RNA polymerase II transcription factor activity // traceable author statement /// 0003714 // transcription corepressor activity // inferred from electronic annotation /// 0003714 // transcription corepressor activity // traceable author statement …	---
211935_at	ARL6IP1	3.98633	1.4269	0.357949	2.68868	0	0.713286	10.1811	10.1031	11.4819	11.6561	1.4269	2.68868	0.00444222	D31885	ADP-ribosylation factor-like 6 interacting protein 1	ARL6IP1	NM_015161	0006613 // cotranslational protein targeting to membrane // inferred from electronic annotation	0005737 // cytoplasm // inferred from electronic annotation /// 0005783 // endoplasmic reticulum // inferred from electronic annotation /// 0005784 // Sec61 translocon complex // inferred from electronic annotation /// 0005829 // cytosol // inferred from electronic annotation /// 0012505 // endomembrane system // inferred from electronic annotation /// 0016020 // membrane // inferred from electro…	0005515 // protein binding // inferred from physical interaction /// 0005515 // protein binding // inferred from electronic annotation	---
242260_at	MATR3	3.26722	1.4262	0.436519	2.68738	0	4.54372	8.25568	8.33617	9.8914	9.55285	1.4262	2.68738	0.0145589	BG283790	Matrin 3	MATR3	NM_001194954 /// NM_001194955 /// NM_001194956 /// NM_018834 /// NM_199189 /// NR_036535	---	0005622 // intracellular // inferred from electronic annotation /// 0005634 // nucleus // inferred from electronic annotation /// 0005637 // nuclear inner membrane // traceable author statement /// 0016363 // nuclear matrix // inferred from electronic annotation	0000166 // nucleotide binding // inferred from electronic annotation /// 0003676 // nucleic acid binding // inferred from electronic annotation /// 0003723 // RNA binding // inferred from electronic annotation /// 0005198 // structural molecule activity // traceable author statement /// 0005515 // protein binding // inferred from physical interaction /// 0008270 // zinc ion binding // inferred fr…	---
218326_s_at	LGR4	4.424	1.42083	0.321164	2.67739	0	0	5.44998	5.4677	6.93763	6.82171	1.42083	2.67739	0.0016988	NM_018490	leucine-rich repeat-containing G protein-coupled receptor 4	LGR4	NM_018490	0007165 // signal transduction // inferred from electronic annotation /// 0007186 // G-protein coupled receptor protein signaling pathway // inferred from electronic annotation	0005886 // plasma membrane // inferred from electronic annotation /// 0016020 // membrane // inferred from electronic annotation /// 0016021 // integral to membrane // inferred from electronic annotation	0004871 // signal transducer activity // inferred from electronic annotation /// 0004872 // receptor activity // inferred from electronic annotation /// 0004930 // G-protein coupled receptor activity // traceable author statement /// 0004930 // G-protein coupled receptor activity // inferred from electronic annotation /// 0005515 // protein binding // inferred from electronic annotation /// 00165…	---
1554768_a_at	MAD2L1	3.95015	1.41611	0.358495	2.66865	0	0.85143	8.93344	8.89922	10.4269	10.238	1.41611	2.66865	0.00456115	AF394735	MAD2 mitotic arrest deficient-like 1 (yeast)	MAD2L1	NM_002358	0000070 // mitotic sister chromatid segregation // inferred from electronic annotation /// 0007049 // cell cycle // inferred from electronic annotation /// 0007067 // mitosis // inferred from electronic annotation /// 0007093 // mitotic cell cycle checkpoint // inferred from direct assay /// 0007094 // mitotic cell cycle spindle assembly checkpoint // inferred from electronic annotation /// 00311…	0000775 // chromosome, centromeric region // inferred from electronic annotation /// 0000776 // kinetochore // inferred from direct assay /// 0000776 // kinetochore // inferred from electronic annotation /// 0000777 // condensed chromosome kinetochore // inferred from electronic annotation /// 0005634 // nucleus // inferred from direct assay /// 0005634 // nucleus // inferred from electronic anno…	0005515 // protein binding // inferred from physical interaction /// 0042803 // protein homodimerization activity // inferred from physical interaction	Cell_cycle_KEGG // GenMAPP
201348_at	GPX3	4.21406	1.40795	0.334107	2.65359	0	0	7.9124	7.95004	9.40823	9.2701	1.40795	2.65359	0.00257468	NM_002084	glutathione peroxidase 3 (plasma)	GPX3	NM_002084	0002238 // response to molecule of fungal origin // inferred from electronic annotation /// 0006749 // glutathione metabolic process // inferred from electronic annotation /// 0006979 // response to oxidative stress // inferred from electronic annotation /// 0006982 // response to lipid hydroperoxide // traceable author statement /// 0007565 // female pregnancy // inferred from electronic annotat…	0005576 // extracellular region // inferred from electronic annotation /// 0005615 // extracellular space // inferred from direct assay /// 0005615 // extracellular space // inferred from electronic annotation /// 0005625 // soluble fraction // inferred from electronic annotation	0004601 // peroxidase activity // inferred from electronic annotation /// 0004602 // glutathione peroxidase activity // inferred from direct assay /// 0004602 // glutathione peroxidase activity // inferred from electronic annotation /// 0008134 // transcription factor binding // traceable author statement /// 0008430 // selenium binding // inferred from direct assay /// 0016491 // oxidoreductase …	---
203765_at	GCA	2.28737	1.40491	0.614205	2.64802	0.0523603	14.0132	5.06919	5.16061	6.86851	6.17112	1.40491	2.64802	0.0573249	NM_012198	grancalcin, EF-hand calcium binding protein	GCA	NM_012198	0006944 // cellular membrane fusion // traceable author statement	0005737 // cytoplasm // inferred from electronic annotation /// 0005737 // cytoplasm // traceable author statement /// 0005886 // plasma membrane // traceable author statement /// 0016020 // membrane // inferred from electronic annotation	0005509 // calcium ion binding // inferred from direct assay /// 0005509 // calcium ion binding // inferred from electronic annotation /// 0005509 // calcium ion binding // traceable author statement /// 0042803 // protein homodimerization activity // inferred from physical interaction	---
218349_s_at	ZWILCH	3.48796	1.40347	0.402375	2.64537	0	3.11037	8.42034	8.52527	10.0059	9.74664	1.40347	2.64537	0.00978351	NM_017975	Zwilch, kinetochore associated, homolog (Drosophila)	ZWILCH	NM_017975 /// NR_003105	0007049 // cell cycle // inferred from electronic annotation /// 0007067 // mitosis // inferred from electronic annotation /// 0007093 // mitotic cell cycle checkpoint // inferred from mutant phenotype /// 0051301 // cell division // inferred from electronic annotation	0000775 // chromosome, centromeric region // inferred from electronic annotation /// 0000776 // kinetochore // inferred from direct assay /// 0000776 // kinetochore // inferred from electronic annotation /// 0000777 // condensed chromosome kinetochore // inferred from electronic annotation	0005515 // protein binding // inferred from physical interaction	---
208910_s_at	C1QBP	4.27596	1.39934	0.327257	2.63781	0	0	11.1668	11.1455	12.6193	12.4916	1.39934	2.63781	0.00213289	L04636	complement component 1, q subcomponent binding protein	C1QBP	NM_001212	0006955 // immune response // traceable author statement /// 0044419 // interspecies interaction between organisms // inferred from electronic annotation	0005634 // nucleus // inferred from electronic annotation /// 0005739 // mitochondrion // inferred from electronic annotation /// 0005759 // mitochondrial matrix // inferred from electronic annotation /// 0005886 // plasma membrane // traceable author statement /// 0016020 // membrane // inferred from direct assay	0001849 // complement component C1q binding // inferred from electronic annotation /// 0005515 // protein binding // inferred from physical interaction	---
216870_x_at	DLEU2	2.84302	1.39537	0.490803	2.63055	0	8.01527	5.38296	5.44545	7.0357	6.58345	1.39537	2.63055	0.0257349	AF264787	deleted in lymphocytic leukemia 2 (non-protein coding)	DLEU2	NR_002612	---	---	---	---
204160_s_at	ENPP4	3.72602	1.39526	0.374465	2.63037	0	1.82839	6.93295	7.12152	8.48284	8.36217	1.39527	2.63037	0.00637485	AW194947	ectonucleotide pyrophosphatase/phosphodiesterase 4 (putative)	ENPP4	NM_014936	0008152 // metabolic process // inferred from electronic annotation	0016020 // membrane // inferred from electronic annotation /// 0016021 // integral to membrane // inferred from electronic annotation	0003824 // catalytic activity // inferred from electronic annotation /// 0016787 // hydrolase activity // inferred from electronic annotation	---
235709_at	GAS2L3	3.2882	1.39269	0.423541	2.62568	0	4.39679	7.83679	7.69272	9.30144	9.01344	1.39269	2.62568	0.0131043	H37811	growth arrest-specific 2 like 3	GAS2L3	NM_174942	0007050 // cell cycle arrest // inferred from electronic annotation	---	---	---
209318_x_at	PLAGL1	2.4408	1.39154	0.570116	2.62358	0.0523603	12.1969	8.31378	8.27228	9.99146	9.37768	1.39154	2.62358	0.0455474	BG547855	pleiomorphic adenoma gene-like 1	PLAGL1	NM_001080951 /// NM_001080952 /// NM_001080953 /// NM_001080954 /// NM_001080955 /// NM_001080956 /// NM_002656 /// NM_006718	0006350 // transcription // inferred from electronic annotation /// 0006917 // induction of apoptosis // traceable author statement /// 0007050 // cell cycle arrest // traceable author statement /// 0045449 // regulation of transcription // inferred from electronic annotation /// 0045944 // positive regulation of transcription from RNA polymerase II promoter // inferred from direct assay	0005622 // intracellular // inferred from electronic annotation /// 0005634 // nucleus // inferred from electronic annotation	0003676 // nucleic acid binding // inferred from electronic annotation /// 0003677 // DNA binding // inferred from direct assay /// 0003677 // DNA binding // inferred from electronic annotation /// 0005515 // protein binding // inferred from electronic annotation /// 0008270 // zinc ion binding // inferred from electronic annotation /// 0046872 // metal ion binding // inferred from electronic ann…	---
213726_x_at	TUBB2C	4.45155	1.38904	0.312034	2.61903	0	0	11.7611	11.8584	13.2081	13.1895	1.38903	2.61903	0.00126787	AA515698	tubulin, beta 2C	TUBB2C	NM_006088	0006928 // cellular component movement // traceable author statement /// 0007017 // microtubule-based process // inferred from electronic annotation /// 0007018 // microtubule-based movement // inferred from electronic annotation /// 0042267 // natural killer cell mediated cytotoxicity // non-traceable author statement /// 0051258 // protein polymerization // inferred from electronic annotation	0005829 // cytosol // not recorded /// 0005856 // cytoskeleton // traceable author statement /// 0005874 // microtubule // inferred from electronic annotation /// 0043234 // protein complex // inferred from electronic annotation	0000166 // nucleotide binding // inferred from electronic annotation /// 0003924 // GTPase activity // inferred from electronic annotation /// 0005198 // structural molecule activity // inferred from electronic annotation /// 0005525 // GTP binding // inferred from electronic annotation /// 0042288 // MHC class I protein binding // traceable author statement /// 0051082 // unfolded protein bindin…	---
205214_at	STK17B	2.52402	1.38695	0.5495	2.61525	0.0391894	11.2621	5.72633	5.62455	7.34482	6.77997	1.38695	2.61525	0.0402447	NM_004226	serine/threonine kinase 17b	STK17B	NM_004226	0006468 // protein phosphorylation // inferred from direct assay /// 0006468 // protein phosphorylation // inferred from electronic annotation /// 0006468 // protein phosphorylation // inferred from sequence or structural similarity /// 0006915 // apoptosis // inferred from electronic annotation /// 0006917 // induction of apoptosis // inferred from mutant phenotype /// 0006917 // induction of ap…	0005634 // nucleus // inferred from direct assay /// 0005634 // nucleus // inferred from electronic annotation /// 0005634 // nucleus // inferred from sequence or structural similarity /// 0015629 // actin cytoskeleton // inferred from electronic annotation	0000166 // nucleotide binding // inferred from electronic annotation /// 0004672 // protein kinase activity // inferred from electronic annotation /// 0004674 // protein serine/threonine kinase activity // inferred from direct assay /// 0004674 // protein serine/threonine kinase activity // inferred from electronic annotation /// 0004674 // protein serine/threonine kinase activity // inferred fro…	---
219123_at	ZNF232	4.85289	1.38665	0.285737	2.61471	0	0	7.91077	7.86612	9.28145	9.26874	1.38665	2.61471	0.000280046	NM_014519	zinc finger protein 232	ZNF232	NM_014519	0006350 // transcription // inferred from electronic annotation /// 0006355 // regulation of transcription, DNA-dependent // inferred from electronic annotation /// 0016032 // viral reproduction // inferred from electronic annotation /// 0045449 // regulation of transcription // inferred from electronic annotation	0005622 // intracellular // inferred from electronic annotation /// 0005634 // nucleus // inferred from electronic annotation	0003676 // nucleic acid binding // inferred from electronic annotation /// 0003677 // DNA binding // inferred from electronic annotation /// 0003700 // sequence-specific DNA binding transcription factor activity // inferred from electronic annotation /// 0008270 // zinc ion binding // inferred from electronic annotation /// 0046872 // metal ion binding // inferred from electronic annotation	---
208691_at	TFRC	4.99108	1.3859	0.277675	2.61335	0	0	10.8357	10.839	12.2383	12.2082	1.3859	2.61335	0.000119444	BC001188	transferrin receptor (p90, CD71)	TFRC	NM_001128148 /// NM_003234	0001666 // response to hypoxia // inferred from electronic annotation /// 0006508 // proteolysis // inferred from electronic annotation /// 0006879 // cellular iron ion homeostasis // non-traceable author statement /// 0006879 // cellular iron ion homeostasis // inferred from electronic annotation /// 0006879 // cellular iron ion homeostasis // traceable author statement /// 0006897 // endocytosi…	0005576 // extracellular region // inferred from direct assay /// 0005576 // extracellular region // inferred from electronic annotation /// 0005739 // mitochondrion // inferred from electronic annotation /// 0005768 // endosome // inferred from direct assay /// 0005768 // endosome // inferred from electronic annotation /// 0005768 // endosome // traceable author statement /// 0005886 // plasma m…	0004872 // receptor activity // inferred from electronic annotation /// 0004998 // transferrin receptor activity // non-traceable author statement /// 0004998 // transferrin receptor activity // traceable author statement /// 0008233 // peptidase activity // inferred from electronic annotation	---
201010_s_at	TXNIP	3.39113	1.3847	0.408329	2.61117	0	3.70897	8.06854	7.78765	9.35195	9.27364	1.3847	2.61117	0.0109059	NM_006472	thioredoxin interacting protein	TXNIP	NM_006472	0000122 // negative regulation of transcription from RNA polymerase II promoter // inferred from electronic annotation /// 0006350 // transcription // inferred from electronic annotation /// 0006606 // protein import into nucleus // inferred from electronic annotation /// 0006979 // response to oxidative stress // inferred from electronic annotation /// 0007049 // cell cycle // inferred from elec…	0005634 // nucleus // inferred from electronic annotation /// 0005737 // cytoplasm // inferred from direct assay /// 0005737 // cytoplasm // inferred from electronic annotation /// 0005758 // mitochondrial intermembrane space // inferred from electronic annotation	0004857 // enzyme inhibitor activity // inferred from electronic annotation /// 0005515 // protein binding // inferred from physical interaction /// 0005515 // protein binding // inferred from electronic annotation /// 0031625 // ubiquitin protein ligase binding // inferred from physical interaction	---
221987_s_at	TSR1	3.53489	1.38381	0.391472	2.60957	0	2.83668	8.82853	8.84322	10.3484	10.0909	1.38381	2.60957	0.00857117	AI803633	TSR1, 20S rRNA accumulation, homolog (S. cerevisiae)	TSR1	NM_018128	0042254 // ribosome biogenesis // inferred from electronic annotation /// 0042255 // ribosome assembly // inferred from sequence or structural similarity	0005634 // nucleus // inferred from electronic annotation /// 0005730 // nucleolus // inferred from sequence or structural similarity /// 0005730 // nucleolus // inferred from electronic annotation	0005515 // protein binding // inferred from physical interaction	---
210766_s_at	CSE1L	4.36501	1.37644	0.315333	2.59626	0	0	10.1633	10.0598	11.4986	11.4774	1.37644	2.59626	0.00146858	AF053640	CSE1 chromosome segregation 1-like (yeast)	CSE1L	NM_001316	0006810 // transport // inferred from electronic annotation /// 0006886 // intracellular protein transport // inferred from electronic annotation /// 0006915 // apoptosis // traceable author statement /// 0008283 // cell proliferation // inferred from electronic annotation /// 0008283 // cell proliferation // traceable author statement /// 0015031 // protein transport // inferred from electronic …	0005634 // nucleus // inferred from electronic annotation /// 0005634 // nucleus // traceable author statement /// 0005737 // cytoplasm // inferred from electronic annotation /// 0005737 // cytoplasm // traceable author statement	0005488 // binding // inferred from electronic annotation /// 0005515 // protein binding // inferred from physical interaction /// 0008262 // importin-alpha export receptor activity // inferred from electronic annotation /// 0008262 // importin-alpha export receptor activity // traceable author statement /// 0008565 // protein transporter activity // inferred from electronic annotation	---
212022_s_at	MKI67	3.0769	1.37361	0.446426	2.59118	0	5.98152	8.38351	8.70348	10.0078	9.82643	1.37361	2.59118	0.0174558	BF001806	antigen identified by monoclonal antibody Ki-67	MKI67	NM_001145966 /// NM_002417	0007049 // cell cycle // inferred from electronic annotation /// 0007126 // meiosis // inferred from electronic annotation /// 0008283 // cell proliferation // traceable author statement /// 0008283 // cell proliferation // inferred from electronic annotation	0000775 // chromosome, centromeric region // inferred from electronic annotation /// 0000793 // condensed chromosome // inferred from electronic annotation /// 0005622 // intracellular // inferred from electronic annotation /// 0005634 // nucleus // inferred from direct assay /// 0005634 // nucleus // inferred from electronic annotation /// 0005730 // nucleolus // inferred from direct assay /// 0…	0000166 // nucleotide binding // inferred from electronic annotation /// 0005515 // protein binding // inferred from physical interaction /// 0005524 // ATP binding // inferred from electronic annotation /// 0008022 // protein C-terminus binding // inferred from physical interaction	---
207332_s_at	TFRC	4.49635	1.37305	0.305371	2.59018	0	0	10.6321	10.6961	12.0087	12.0656	1.37306	2.59018	0.000972214	NM_003234	transferrin receptor (p90, CD71)	TFRC	NM_001128148 /// NM_003234	0001666 // response to hypoxia // inferred from electronic annotation /// 0006508 // proteolysis // inferred from electronic annotation /// 0006879 // cellular iron ion homeostasis // non-traceable author statement /// 0006879 // cellular iron ion homeostasis // inferred from electronic annotation /// 0006879 // cellular iron ion homeostasis // traceable author statement /// 0006897 // endocytosi…	0005576 // extracellular region // inferred from direct assay /// 0005576 // extracellular region // inferred from electronic annotation /// 0005739 // mitochondrion // inferred from electronic annotation /// 0005768 // endosome // inferred from direct assay /// 0005768 // endosome // inferred from electronic annotation /// 0005768 // endosome // traceable author statement /// 0005886 // plasma m…	0004872 // receptor activity // inferred from electronic annotation /// 0004998 // transferrin receptor activity // non-traceable author statement /// 0004998 // transferrin receptor activity // traceable author statement /// 0008233 // peptidase activity // inferred from electronic annotation	---
229441_at	PRSS23	4.48168	1.37259	0.306267	2.58935	0	0	8.33854	8.42553	9.75002	9.75924	1.37259	2.58935	0.00101392	AI569872	Protease, serine, 23	PRSS23	NM_007173	0006508 // proteolysis // inferred from electronic annotation	0005576 // extracellular region // inferred from electronic annotation /// 0005634 // nucleus // inferred from direct assay	0003824 // catalytic activity // inferred from electronic annotation /// 0004252 // serine-type endopeptidase activity // inferred from electronic annotation /// 0008233 // peptidase activity // inferred from electronic annotation /// 0008236 // serine-type peptidase activity // inferred from electronic annotation /// 0016787 // hydrolase activity // inferred from electronic annotation	---
229700_at	ZNF738	2.52397	1.37227	0.543695	2.58877	0.0391894	11.2627	6.66777	6.73848	8.35433	7.79646	1.37227	2.58877	0.0395097	BE966267	zinc finger protein 738	ZNF738	NR_027130	0000209 // protein polyubiquitination // inferred from sequence or structural similarity /// 0006350 // transcription // inferred from electronic annotation /// 0006355 // regulation of transcription, DNA-dependent // inferred from electronic annotation /// 0042981 // regulation of apoptosis // inferred from sequence or structural similarity /// 0045449 // regulation of transcription // inferred …	0005622 // intracellular // inferred from electronic annotation /// 0005634 // nucleus // inferred from electronic annotation	0003676 // nucleic acid binding // inferred from electronic annotation /// 0003677 // DNA binding // inferred from electronic annotation /// 0004842 // ubiquitin-protein ligase activity // inferred from sequence or structural similarity /// 0008270 // zinc ion binding // inferred from electronic annotation	---
203362_s_at	MAD2L1	2.72671	1.36895	0.502052	2.58283	0	9.13661	9.77026	9.56427	11.2525	10.82	1.36895	2.58283	0.0292765	NM_002358	MAD2 mitotic arrest deficient-like 1 (yeast)	MAD2L1	NM_002358	0000070 // mitotic sister chromatid segregation // inferred from electronic annotation /// 0007049 // cell cycle // inferred from electronic annotation /// 0007067 // mitosis // inferred from electronic annotation /// 0007093 // mitotic cell cycle checkpoint // inferred from direct assay /// 0007094 // mitotic cell cycle spindle assembly checkpoint // inferred from electronic annotation /// 00311…	0000775 // chromosome, centromeric region // inferred from electronic annotation /// 0000776 // kinetochore // inferred from direct assay /// 0000776 // kinetochore // inferred from electronic annotation /// 0000777 // condensed chromosome kinetochore // inferred from electronic annotation /// 0005634 // nucleus // inferred from direct assay /// 0005634 // nucleus // inferred from electronic anno…	0005515 // protein binding // inferred from physical interaction /// 0042803 // protein homodimerization activity // inferred from physical interaction	Cell_cycle_KEGG // GenMAPP
210260_s_at	TNFAIP8	3.02253	1.36733	0.452379	2.57992	0	6.42784	6.86384	6.77449	8.37101	8.00197	1.36733	2.57992	0.0187387	BC005352	tumor necrosis factor, alpha-induced protein 8	TNFAIP8	NM_001077654 /// NM_014350	0006915 // apoptosis // inferred from electronic annotation /// 0006916 // anti-apoptosis // traceable author statement /// 0019987 // negative regulation of anti-apoptosis // inferred from mutant phenotype	0005737 // cytoplasm // inferred from direct assay /// 0005737 // cytoplasm // inferred from electronic annotation	0005515 // protein binding // inferred from physical interaction /// 0043027 // caspase inhibitor activity // inferred from mutant phenotype	---
220239_at	KLHL7	3.95948	1.36517	0.344785	2.57607	0	0.815294	8.06306	8.08941	9.36021	9.5226	1.36517	2.57607	0.00361092	NM_018846	kelch-like 7 (Drosophila)	KLHL7	NM_001031710 /// NM_001172428 /// NM_018846 /// NR_033328 /// NR_033329	0007601 // visual perception // inferred from electronic annotation /// 0050896 // response to stimulus // inferred from electronic annotation	0005634 // nucleus // inferred from electronic annotation /// 0005730 // nucleolus // inferred from direct assay	0005515 // protein binding // inferred from electronic annotation	---
215629_s_at	DLEU2 /// DLEU2L	2.15007	1.36193	0.633436	2.5703	0.0523603	15.7319	5.47654	5.27764	7.09635	6.38169	1.36193	2.5703	0.0668206	AA905286	deleted in lymphocytic leukemia 2 (non-protein coding) /// deleted in lymphocytic leukemia 2-like	DLEU2 /// DLEU2L	NR_002612 /// NR_002771	---	---	---	---
229641_at	CCBE1	4.31602	1.35981	0.31506	2.56651	0	0	8.8612	8.89897	10.2889	10.1909	1.35981	2.56651	0.00148912	BG252802	collagen and calcium binding EGF domains 1	CCBE1	NM_133459	0001525 // angiogenesis // inferred from electronic annotation /// 0001946 // lymphangiogenesis // inferred from mutant phenotype /// 0001946 // lymphangiogenesis // inferred from sequence or structural similarity /// 0002040 // sprouting angiogenesis // inferred from sequence or structural similarity /// 0007275 // multicellular organismal development // inferred from electronic annotation /// 0…	0005576 // extracellular region // inferred from electronic annotation	0005509 // calcium ion binding // inferred from electronic annotation	---
201663_s_at	SMC4	2.57754	1.3596	0.52748	2.56614	0.0391894	10.6798	9.55067	9.41219	11.0968	10.5853	1.3596	2.56614	0.0359413	NM_005496	structural maintenance of chromosomes 4	SMC4	NM_001002800 /// NM_005496	0000070 // mitotic sister chromatid segregation // traceable author statement /// 0007049 // cell cycle // inferred from electronic annotation /// 0007067 // mitosis // inferred from electronic annotation /// 0007076 // mitotic chromosome condensation // inferred from direct assay /// 0030261 // chromosome condensation // inferred from electronic annotation /// 0051276 // chromosome organization …	0000796 // condensin complex // inferred from direct assay /// 0000796 // condensin complex // traceable author statement /// 0005634 // nucleus // traceable author statement /// 0005634 // nucleus // inferred from electronic annotation /// 0005694 // chromosome // inferred from electronic annotation /// 0005737 // cytoplasm // inferred from electronic annotation	0000166 // nucleotide binding // inferred from electronic annotation /// 0005515 // protein binding // inferred from electronic annotation /// 0005524 // ATP binding // traceable author statement /// 0005524 // ATP binding // inferred from electronic annotation /// 0046982 // protein heterodimerization activity // inferred from physical interaction	---
206307_s_at	FOXD1	3.61586	1.35836	0.375668	2.56394	0	2.38902	11.297	11.3444	12.5684	12.7897	1.35836	2.56394	0.00686614	NM_004472	forkhead box D1	FOXD1	NM_004472	0000122 // negative regulation of transcription from RNA polymerase II promoter // inferred from sequence or structural similarity /// 0001658 // branching involved in ureteric bud morphogenesis // inferred from sequence or structural similarity /// 0001755 // neural crest cell migration // inferred from sequence or structural similarity /// 0001822 // kidney development // inferred from sequence…	0005634 // nucleus // inferred by curator /// 0005634 // nucleus // inferred from electronic annotation /// 0005667 // transcription factor complex // inferred from sequence or structural similarity	0003677 // DNA binding // inferred from direct assay /// 0003677 // DNA binding // inferred from electronic annotation /// 0003690 // double-stranded DNA binding // inferred from sequence or structural similarity /// 0003700 // sequence-specific DNA binding transcription factor activity // inferred from sequence or structural similarity /// 0003700 // sequence-specific DNA binding transcription f…	---
226099_at	ELL2	2.57447	1.35734	0.527229	2.56212	0.0391894	10.7128	8.78589	8.84882	10.4375	9.91187	1.35734	2.56212	0.0359903	AI924426	elongation factor, RNA polymerase II, 2	ELL2	NM_012081	0006350 // transcription // inferred from electronic annotation /// 0006368 // RNA elongation from RNA polymerase II promoter // inferred from electronic annotation /// 0006368 // RNA elongation from RNA polymerase II promoter // traceable author statement /// 0045449 // regulation of transcription // inferred from electronic annotation	0005634 // nucleus // inferred from electronic annotation /// 0008023 // transcription elongation factor complex // inferred from electronic annotation /// 0008023 // transcription elongation factor complex // traceable author statement	0003702 // RNA polymerase II transcription factor activity // traceable author statement /// 0003746 // translation elongation factor activity // inferred from electronic annotation /// 0016944 // RNA polymerase II transcription elongation factor activity // inferred from electronic annotation	---
223515_s_at	COQ3	3.70945	1.35618	0.365602	2.56007	0	1.90922	8.18214	8.32755	9.68409	9.53797	1.35618	2.56007	0.00572697	AL136726	coenzyme Q3 homolog, methyltransferase (S. cerevisiae)	COQ3	NM_017421	0006071 // glycerol metabolic process // inferred from genetic interaction /// 0006744 // ubiquinone biosynthetic process // inferred from genetic interaction /// 0006744 // ubiquinone biosynthetic process // inferred from electronic annotation /// 0008152 // metabolic process // inferred from electronic annotation	0005739 // mitochondrion // inferred from reviewed computational analysis /// 0005739 // mitochondrion // inferred from electronic annotation /// 0005759 // mitochondrial matrix // inferred from electronic annotation	0004395 // hexaprenyldihydroxybenzoate methyltransferase activity // inferred from electronic annotation /// 0008168 // methyltransferase activity // inferred from electronic annotation /// 0008171 // O-methyltransferase activity // traceable author statement /// 0008425 // 2-polyprenyl-6-methoxy-1,4-benzoquinone methyltransferase activity // inferred from electronic annotation /// 0016740 // tra…	---
210334_x_at	BIRC5	2.48207	1.35497	0.545905	2.55793	0.0391894	11.7288	7.96356	8.06046	9.08778	9.64619	1.35497	2.55793	0.0410637	AB028869	baculoviral IAP repeat-containing 5	BIRC5	NM_001012270 /// NM_001012271 /// NM_001168	0000086 // G2/M transition of mitotic cell cycle // inferred from direct assay /// 0000226 // microtubule cytoskeleton organization // inferred from electronic annotation /// 0000910 // cytokinesis // inferred from mutant phenotype /// 0006915 // apoptosis // inferred from electronic annotation /// 0006916 // anti-apoptosis // inferred from direct assay /// 0007049 // cell cycle // inferred from …	0000228 // nuclear chromosome // inferred from direct assay /// 0000775 // chromosome, centromeric region // inferred from direct assay /// 0000775 // chromosome, centromeric region // inferred from electronic annotation /// 0005622 // intracellular // inferred from electronic annotation /// 0005634 // nucleus // inferred from direct assay /// 0005634 // nucleus // inferred from electronic annota…	0004869 // cysteine-type endopeptidase inhibitor activity // inferred from electronic annotation /// 0004872 // receptor activity // inferred from electronic annotation /// 0004872 // receptor activity // non-traceable author statement /// 0005515 // protein binding // inferred from physical interaction /// 0008017 // microtubule binding // inferred from direct assay /// 0008233 // peptidase acti…	Apoptosis // GenMAPP			BIRC5	baculoviral IAP repeat-containing 5
201843_s_at	EFEMP1	3.14126	1.35465	0.431245	2.55735	0	5.47384	5.15947	5.38179	6.75221	6.49836	1.35465	2.55735	0.01516	NM_004105	EGF-containing fibulin-like extracellular matrix protein 1	EFEMP1	NM_001039348 /// NM_001039349 /// NM_004105	0007173 // epidermal growth factor receptor signaling pathway // inferred from direct assay /// 0007601 // visual perception // traceable author statement /// 0018108 // peptidyl-tyrosine phosphorylation // inferred from direct assay /// 0032331 // negative regulation of chondrocyte differentiation // inferred from direct assay /// 0045449 // regulation of transcription // inferred from direct as…	0005576 // extracellular region // inferred from electronic annotation /// 0005578 // proteinaceous extracellular matrix // traceable author statement /// 0005615 // extracellular space // inferred from direct assay /// 0031012 // extracellular matrix // inferred from direct assay	0005006 // epidermal growth factor receptor activity // inferred from direct assay /// 0005154 // epidermal growth factor receptor binding // inferred from direct assay /// 0005509 // calcium ion binding // inferred from electronic annotation /// 0005515 // protein binding // inferred from physical interaction	---
222875_at	DHX33	3.55719	1.35349	0.380495	2.5553	0	2.71032	9.80543	10.0399	11.2631	11.2892	1.35349	2.5553	0.007511	AI720923	DEAH (Asp-Glu-Ala-His) box polypeptide 33	DHX33	NM_020162	---	0005634 // nucleus // inferred from electronic annotation /// 0005730 // nucleolus // inferred from electronic annotation	0000166 // nucleotide binding // inferred from electronic annotation /// 0003676 // nucleic acid binding // inferred from electronic annotation /// 0004386 // helicase activity // inferred from electronic annotation /// 0005524 // ATP binding // inferred from electronic annotation /// 0008026 // ATP-dependent helicase activity // inferred from electronic annotation /// 0016787 // hydrolase activi…	---
205443_at	SNAPC1	3.0211	1.34356	0.444726	2.53777	0	6.43978	9.93051	9.73	11.326	11.0217	1.34356	2.53777	0.0178975	NM_003082	small nuclear RNA activating complex, polypeptide 1, 43kDa	SNAPC1	NM_003082	0006350 // transcription // inferred from electronic annotation /// 0045449 // regulation of transcription // inferred from electronic annotation	0005634 // nucleus // inferred from electronic annotation	0003677 // DNA binding // inferred from electronic annotation	---
213906_at	MYBL1	3.06864	1.33854	0.436201	2.52896	0	6.04834	7.29756	7.20374	8.75641	8.42197	1.33854	2.52896	0.0164211	AW592266	v-myb myeloblastosis viral oncogene homolog (avian)-like 1	MYBL1	NM_001080416 /// NM_001144755	0006350 // transcription // inferred from electronic annotation /// 0006355 // regulation of transcription, DNA-dependent // non-traceable author statement /// 0045449 // regulation of transcription // inferred from electronic annotation	0005634 // nucleus // inferred from direct assay /// 0005634 // nucleus // non-traceable author statement /// 0005634 // nucleus // inferred from electronic annotation /// 0005730 // nucleolus // inferred from direct assay	0003677 // DNA binding // inferred from electronic annotation /// 0016563 // transcription activator activity // non-traceable author statement /// 0030528 // transcription regulator activity // inferred from electronic annotation	---
212020_s_at	MKI67	1.90856	1.32897	0.696321	2.51223	0.143798	18.9309	7.95924	8.42067	9.88628	9.15157	1.32897	2.51223	0.0920684	AU152107	antigen identified by monoclonal antibody Ki-67	MKI67	NM_001145966 /// NM_002417	0007049 // cell cycle // inferred from electronic annotation /// 0007126 // meiosis // inferred from electronic annotation /// 0008283 // cell proliferation // traceable author statement /// 0008283 // cell proliferation // inferred from electronic annotation	0000775 // chromosome, centromeric region // inferred from electronic annotation /// 0000793 // condensed chromosome // inferred from electronic annotation /// 0005622 // intracellular // inferred from electronic annotation /// 0005634 // nucleus // inferred from direct assay /// 0005634 // nucleus // inferred from electronic annotation /// 0005730 // nucleolus // inferred from direct assay /// 0…	0000166 // nucleotide binding // inferred from electronic annotation /// 0005515 // protein binding // inferred from physical interaction /// 0005524 // ATP binding // inferred from electronic annotation /// 0008022 // protein C-terminus binding // inferred from physical interaction	---
218726_at	HJURP	2.91377	1.32646	0.45524	2.50787	0	7.36879	9.37023	9.57665	10.9627	10.6372	1.32646	2.50787	0.0204615	NM_018410	Holliday junction recognition protein	HJURP	NM_018410	0007049 // cell cycle // inferred from electronic annotation /// 0007059 // chromosome segregation // inferred from mutant phenotype /// 0034080 // CenH3-containing nucleosome assembly at centromere // inferred from mutant phenotype /// 0034509 // centromeric core chromatin assembly // inferred from mutant phenotype	0000775 // chromosome, centromeric region // inferred from direct assay /// 0000775 // chromosome, centromeric region // inferred from electronic annotation /// 0000777 // condensed chromosome kinetochore // inferred from direct assay /// 0005634 // nucleus // inferred from direct assay /// 0005634 // nucleus // inferred from electronic annotation /// 0005730 // nucleolus // inferred from direct …	0003677 // DNA binding // inferred from electronic annotation /// 0005515 // protein binding // inferred from physical interaction /// 0042393 // histone binding // inferred from physical interaction	---
201288_at	ARHGDIB	3.25592	1.32524	0.407025	2.50575	0	4.62377	10.5999	10.7721	12.1273	11.8952	1.32524	2.50575	0.0116808	NM_001175	Rho GDP dissociation inhibitor (GDI) beta	ARHGDIB	NM_001175	0006928 // cellular component movement // traceable author statement /// 0006955 // immune response // traceable author statement /// 0007162 // negative regulation of cell adhesion // traceable author statement /// 0007266 // Rho protein signal transduction // traceable author statement /// 0007275 // multicellular organismal development // traceable author statement /// 0030036 // actin cytoske…	0005737 // cytoplasm // traceable author statement /// 0005737 // cytoplasm // inferred from electronic annotation /// 0005856 // cytoskeleton // traceable author statement /// 0016023 // cytoplasmic membrane-bounded vesicle // traceable author statement	0005094 // Rho GDP-dissociation inhibitor activity // inferred from electronic annotation /// 0005094 // Rho GDP-dissociation inhibitor activity // traceable author statement /// 0005096 // GTPase activator activity // inferred from electronic annotation /// 0005515 // protein binding // inferred from electronic annotation	G13_Signaling_Pathway // GenMAPP
236957_at	CDCA2	3.25779	1.32523	0.406788	2.50573	0	4.61044	7.10554	6.81703	8.28752	8.28552	1.32523	2.50573	0.0116433	AI248208	cell division cycle associated 2	CDCA2	NM_152562	0007049 // cell cycle // inferred from electronic annotation /// 0007067 // mitosis // inferred from electronic annotation /// 0051301 // cell division // inferred from electronic annotation	0005634 // nucleus // inferred from electronic annotation	---	---
202154_x_at	TUBB3	3.80283	1.32417	0.348206	2.50389	0	1.46947	10.3538	10.5187	11.7836	11.7372	1.32417	2.50389	0.00416047	NM_006086	tubulin, beta 3	TUBB3	NM_001197181 /// NM_006086	0007017 // microtubule-based process // inferred from electronic annotation /// 0007018 // microtubule-based movement // inferred from electronic annotation /// 0007067 // mitosis // inferred from electronic annotation /// 0007165 // signal transduction // inferred from electronic annotation /// 0007186 // G-protein coupled receptor protein signaling pathway // inferred from electronic annotation…	0005622 // intracellular // inferred from electronic annotation /// 0005737 // cytoplasm // inferred from electronic annotation /// 0005874 // microtubule // inferred from electronic annotation /// 0005886 // plasma membrane // inferred from electronic annotation /// 0005886 // plasma membrane // inferred from direct assay /// 0005887 // integral to plasma membrane // traceable author statement /…	0000166 // nucleotide binding // inferred from electronic annotation /// 0003924 // GTPase activity // inferred from electronic annotation /// 0004871 // signal transducer activity // inferred from electronic annotation /// 0004872 // receptor activity // inferred from electronic annotation /// 0004930 // G-protein coupled receptor activity // inferred from electronic annotation /// 0004977 // me…	Circadian_Exercise // GenMAPP /// GPCRDB_Class_A_Rhodopsin-like // GenMAPP /// Peptide_GPCRs // GenMAPP			TUBB3	tubulin, beta 3; melanocortin 1 receptor (alpha melanocyte stimulating hormone receptor)
1554878_a_at	ABCD3	2.85259	1.32188	0.463397	2.49992	0	7.92624	7.76352	7.86272	9.32965	8.94035	1.32188	2.49992	0.0223207	BC009712	ATP-binding cassette, sub-family D (ALD), member 3	ABCD3	NM_001122674 /// NM_002858	0006810 // transport // inferred from electronic annotation /// 0007031 // peroxisome organization // traceable author statement /// 0015910 // peroxisomal long-chain fatty acid import // traceable author statement /// 0042221 // response to chemical stimulus // inferred from electronic annotation /// 0042493 // response to drug // inferred from electronic annotation /// 0055085 // transmembrane …	0005739 // mitochondrion // inferred from electronic annotation /// 0005743 // mitochondrial inner membrane // inferred from electronic annotation /// 0005777 // peroxisome // inferred from direct assay /// 0005777 // peroxisome // inferred from electronic annotation /// 0005778 // peroxisomal membrane // inferred from electronic annotation /// 0005778 // peroxisomal membrane // traceable author …	0000166 // nucleotide binding // inferred from electronic annotation /// 0005515 // protein binding // inferred from physical interaction /// 0005515 // protein binding // inferred from electronic annotation /// 0005524 // ATP binding // inferred from electronic annotation /// 0016887 // ATPase activity // inferred from electronic annotation /// 0017111 // nucleoside-triphosphatase activity // in…	---
1555007_s_at	WDR66	4.38007	1.32172	0.301759	2.49964	0	0	8.30388	8.28802	9.6561	9.57925	1.32172	2.49964	0.000879852	BC036233	WD repeat domain 66	WDR66	NM_001178003 /// NM_144668	---	---	0005509 // calcium ion binding // inferred from electronic annotation	---
215942_s_at	GTSE1	3.83626	1.31853	0.343703	2.49412	0	1.32122	7.76295	7.68321	9.11233	8.97091	1.31853	2.49412	0.00376879	BF973178	G-2 and S-phase expressed 1	GTSE1	NM_016426	0000085 // G2 phase of mitotic cell cycle // non-traceable author statement /// 0006977 // DNA damage response, signal transduction by p53 class mediator resulting in cell cycle arrest // non-traceable author statement /// 0007017 // microtubule-based process // non-traceable author statement	0005737 // cytoplasm // inferred from electronic annotation /// 0005874 // microtubule // inferred from electronic annotation /// 0005881 // cytoplasmic microtubule // non-traceable author statement	---	---
219368_at	NAP1L2	2.51111	1.31669	0.524344	2.49093	0.0391894	11.4047	4.3881	4.52202	6.02485	5.51863	1.31669	2.49093	0.037339	NM_021963	nucleosome assembly protein 1-like 2	NAP1L2	NM_021963	0006334 // nucleosome assembly // inferred from electronic annotation /// 0006334 // nucleosome assembly // traceable author statement	0005634 // nucleus // inferred from electronic annotation /// 0005634 // nucleus // traceable author statement /// 0005678 // chromatin assembly complex // traceable author statement	---	---
206653_at	POLR3G	3.06534	1.31658	0.429505	2.49075	0	6.07512	8.19084	8.11482	9.632	9.30681	1.31658	2.49075	0.0157071	BF062139	polymerase (RNA) III (DNA directed) polypeptide G (32kD)	POLR3G	NM_006467	0006350 // transcription // inferred from electronic annotation /// 0006359 // regulation of transcription from RNA polymerase III promoter // traceable author statement /// 0009615 // response to virus // inferred from electronic annotation /// 0032728 // positive regulation of interferon-beta production // inferred from mutant phenotype /// 0045087 // innate immune response // inferred from ele…	0005634 // nucleus // inferred from electronic annotation /// 0005666 // DNA-directed RNA polymerase III complex // traceable author statement	0003899 // DNA-directed RNA polymerase activity // inferred from electronic annotation /// 0003899 // DNA-directed RNA polymerase activity // traceable author statement	---
201848_s_at	BNIP3	3.71563	1.31045	0.352685	2.48018	0	1.87894	9.5143	9.43975	10.8696	10.7054	1.31045	2.48018	0.00469995	U15174	BCL2/adenovirus E1B 19kDa interacting protein 3	BNIP3	NM_004052	0001666 // response to hypoxia // inferred from sequence or structural similarity /// 0001666 // response to hypoxia // inferred from electronic annotation /// 0006309 // DNA fragmentation involved in apoptotic nuclear change // inferred from direct assay /// 0006338 // chromatin remodeling // inferred from direct assay /// 0006800 // oxygen and reactive oxygen species metabolic process // inferr…	0005634 // nucleus // inferred from sequence or structural similarity /// 0005634 // nucleus // inferred from electronic annotation /// 0005635 // nuclear envelope // inferred from direct assay /// 0005654 // nucleoplasm // inferred from sequence or structural similarity /// 0005654 // nucleoplasm // inferred from electronic annotation /// 0005737 // cytoplasm // inferred from sequence or structu…	0005515 // protein binding // inferred from physical interaction /// 0042802 // identical protein binding // inferred from physical interaction /// 0042803 // protein homodimerization activity // inferred from direct assay /// 0046982 // protein heterodimerization activity // inferred from direct assay	---
229194_at	PCGF5	2.94568	1.30967	0.444609	2.47886	0	7.08602	7.51051	7.36428	8.91382	8.58031	1.30967	2.47886	0.0187858	AL045882	polycomb group ring finger 5	PCGF5	NM_032373	0006350 // transcription // inferred from electronic annotation /// 0045449 // regulation of transcription // inferred from electronic annotation	0005813 // centrosome // inferred from direct assay	0005515 // protein binding // inferred from electronic annotation /// 0008270 // zinc ion binding // inferred from electronic annotation /// 0046872 // metal ion binding // inferred from electronic annotation	---
205406_s_at	SPA17	4.54905	1.30947	0.287856	2.4785	0	0	7.63795	7.59294	8.91329	8.93654	1.30947	2.4785	0.000373915	NM_017425	sperm autoantigenic protein 17	SPA17	NM_017425	0007165 // signal transduction // inferred from electronic annotation /// 0007283 // spermatogenesis // traceable author statement /// 0007338 // single fertilization // traceable author statement /// 0007339 // binding of sperm to zona pellucida // inferred from electronic annotation	0016020 // membrane // inferred from electronic annotation	0008603 // cAMP-dependent protein kinase regulator activity // inferred from electronic annotation	---
236140_at	GCLM	2.17908	1.30862	0.600538	2.47705	0.0523603	15.3621	6.29203	5.68808	7.45053	7.14681	1.30862	2.47705	0.0607046	AI753488	glutamate-cysteine ligase, modifier subunit	GCLM	NM_002061	0006534 // cysteine metabolic process // inferred from electronic annotation /// 0006536 // glutamate metabolic process // inferred from direct assay /// 0006749 // glutathione metabolic process // inferred from electronic annotation /// 0006750 // glutathione biosynthetic process // inferred from direct assay /// 0006750 // glutathione biosynthetic process // inferred from mutant phenotype /// 0…	0005625 // soluble fraction // inferred from direct assay /// 0005829 // cytosol // non-traceable author statement /// 0017109 // glutamate-cysteine ligase complex // inferred from electronic annotation	0004357 // glutamate-cysteine ligase activity // inferred from direct assay /// 0004357 // glutamate-cysteine ligase activity // inferred from mutant phenotype /// 0004357 // glutamate-cysteine ligase activity // inferred from electronic annotation /// 0005515 // protein binding // inferred from physical interaction /// 0016491 // oxidoreductase activity // inferred from electronic annotation ///…	---
222262_s_at	ETNK1	3.98501	1.30669	0.327902	2.47374	0	0.718225	7.59399	7.71907	8.94417	8.98228	1.30669	2.47374	0.0024937	AL137750	ethanolamine kinase 1	ETNK1	NM_001039481 /// NM_018638	0006646 // phosphatidylethanolamine biosynthetic process // inferred from direct assay /// 0008654 // phospholipid biosynthetic process // inferred from electronic annotation	0005737 // cytoplasm // non-traceable author statement /// 0005737 // cytoplasm // inferred from electronic annotation	0000166 // nucleotide binding // inferred from electronic annotation /// 0004305 // ethanolamine kinase activity // inferred from direct assay /// 0004305 // ethanolamine kinase activity // inferred from electronic annotation /// 0005524 // ATP binding // inferred from electronic annotation /// 0016301 // kinase activity // inferred from electronic annotation /// 0016740 // transferase activity /…	---
223452_s_at	ATL3	3.67923	1.30625	0.355034	2.47298	0	2.05983	8.54571	8.68615	9.9824	9.86196	1.30625	2.47298	0.00497779	AL117600	atlastin GTPase 3	ATL3	NM_015459	0006888 // ER to Golgi vesicle-mediated transport // inferred from mutant phenotype /// 0007029 // endoplasmic reticulum organization // inferred from mutant phenotype /// 0051260 // protein homooligomerization // inferred from direct assay	0005783 // endoplasmic reticulum // inferred from direct assay /// 0005783 // endoplasmic reticulum // inferred from electronic annotation /// 0005789 // endoplasmic reticulum membrane // inferred from electronic annotation /// 0016020 // membrane // inferred from electronic annotation /// 0016021 // integral to membrane // inferred from direct assay /// 0016021 // integral to membrane // inferre…	0000166 // nucleotide binding // inferred from electronic annotation /// 0003924 // GTPase activity // non-traceable author statement /// 0003924 // GTPase activity // inferred from electronic annotation /// 0005525 // GTP binding // inferred from electronic annotation /// 0016787 // hydrolase activity // inferred from electronic annotation /// 0042802 // identical protein binding // inferred fro…	---
204141_at	TUBB2A	3.82562	1.30511	0.34115	2.47103	0	1.3679	8.72252	8.71465	10.1022	9.94517	1.30511	2.47103	0.00360947	NM_001069	tubulin, beta 2A	TUBB2A	NM_001069	0007017 // microtubule-based process // inferred from electronic annotation /// 0007018 // microtubule-based movement // inferred from electronic annotation /// 0007067 // mitosis // inferred from electronic annotation /// 0030182 // neuron differentiation // inferred from electronic annotation /// 0051258 // protein polymerization // inferred from electronic annotation	0005874 // microtubule // inferred from electronic annotation /// 0043234 // protein complex // inferred from electronic annotation	0000166 // nucleotide binding // inferred from electronic annotation /// 0003924 // GTPase activity // inferred from electronic annotation /// 0005198 // structural molecule activity // inferred from electronic annotation /// 0005515 // protein binding // inferred from physical interaction /// 0005525 // GTP binding // inferred from electronic annotation /// 0042277 // peptide binding // inferred…	---
225300_at	C15orf23	3.51106	1.30411	0.371428	2.46931	0	2.97431	8.85067	8.67026	10.1256	10.0036	1.30411	2.46931	0.00690112	BF792864	chromosome 15 open reading frame 23	C15orf23	NM_001142761 /// NM_001142762 /// NM_033286	---	0005634 // nucleus // inferred from electronic annotation	0005515 // protein binding // inferred from physical interaction	---
223824_at	RNLS	3.57567	1.30379	0.364629	2.46877	0	2.60737	6.70643	6.89737	8.0695	8.14188	1.30379	2.46877	0.00607675	BC005364	renalase, FAD-dependent amine oxidase	RNLS	NM_001031709 /// NM_018363	0055114 // oxidation reduction // inferred from electronic annotation	0005576 // extracellular region // inferred from electronic annotation	0016491 // oxidoreductase activity // inferred from electronic annotation	---
203755_at	BUB1B	3.6413	1.30065	0.357194	2.4634	0	2.25462	8.69321	8.81726	10.1274	9.98437	1.30065	2.4634	0.00525579	NM_001211	budding uninhibited by benzimidazoles 1 homolog beta (yeast)	BUB1B	NM_001211	0006468 // protein phosphorylation // inferred from electronic annotation /// 0006915 // apoptosis // inferred from electronic annotation /// 0007049 // cell cycle // non-traceable author statement /// 0007049 // cell cycle // inferred from electronic annotation /// 0007051 // spindle organization // non-traceable author statement /// 0007067 // mitosis // non-traceable author statement /// 00070…	0000775 // chromosome, centromeric region // inferred from electronic annotation /// 0000776 // kinetochore // inferred from direct assay /// 0000776 // kinetochore // non-traceable author statement /// 0000776 // kinetochore // traceable author statement /// 0000776 // kinetochore // inferred from electronic annotation /// 0000777 // condensed chromosome kinetochore // inferred from direct assay…	0000166 // nucleotide binding // inferred from electronic annotation /// 0004672 // protein kinase activity // non-traceable author statement /// 0004672 // protein kinase activity // inferred from electronic annotation /// 0004672 // protein kinase activity // traceable author statement /// 0004674 // protein serine/threonine kinase activity // inferred from electronic annotation /// 0005515 // …	Cell_cycle_KEGG // GenMAPP /// Integrin-mediated_cell_adhesion_KEGG // GenMAPP
202533_s_at	DHFR	4.59375	1.29795	0.282548	2.4588	0	0	8.60199	8.64099	9.92398	9.9149	1.29795	2.4588	0.000237833	BC003584	dihydrofolate reductase	DHFR	NM_000791	0006545 // glycine biosynthetic process // inferred from electronic annotation /// 0006545 // glycine biosynthetic process // non-traceable author statement /// 0006730 // one-carbon metabolic process // inferred from electronic annotation /// 0009165 // nucleotide biosynthetic process // inferred from electronic annotation /// 0009165 // nucleotide biosynthetic process // non-traceable author st…	---	0004146 // dihydrofolate reductase activity // inferred from electronic annotation /// 0004146 // dihydrofolate reductase activity // inferred from direct assay /// 0004146 // dihydrofolate reductase activity // non-traceable author statement /// 0008144 // drug binding // inferred from direct assay /// 0016491 // oxidoreductase activity // inferred from electronic annotation /// 0050661 // NADP …	Nucleotide_Metabolism // GenMAPP			DHFR	dihydrofolate reductase
213449_at	POP1	3.20853	1.29792	0.40452	2.45873	0	4.96671	7.95255	8.12404	9.44939	9.22303	1.29792	2.45873	0.0117578	D31765	processing of precursor 1, ribonuclease P/MRP subunit (S. cerevisiae)	POP1	NM_001145860 /// NM_001145861 /// NM_015029	0001682 // tRNA 5'-leader removal // inferred from electronic annotation /// 0006396 // RNA processing // inferred from electronic annotation /// 0008033 // tRNA processing // inferred from electronic annotation /// 0016078 // tRNA catabolic process // inferred from direct assay	0000172 // ribonuclease MRP complex // inferred from direct assay /// 0005634 // nucleus // inferred from electronic annotation /// 0005655 // nucleolar ribonuclease P complex // inferred from direct assay /// 0005730 // nucleolus // inferred from electronic annotation	0000171 // ribonuclease MRP activity // inferred from direct assay /// 0004526 // ribonuclease P activity // inferred from direct assay /// 0004526 // ribonuclease P activity // inferred from electronic annotation /// 0005515 // protein binding // inferred from physical interaction /// 0016787 // hydrolase activity // inferred from electronic annotation /// 0042802 // identical protein binding //…	---
218577_at	LRRC40	2.30489	1.28753	0.55861	2.4411	0.0523603	13.8	8.7988	8.55446	10.2339	9.69446	1.28753	2.4411	0.0490259	NM_017768	leucine rich repeat containing 40	LRRC40	NM_017768	---	---	0005515 // protein binding // inferred from electronic annotation	---
204315_s_at	GTSE1	3.04949	1.28673	0.421948	2.43974	0	6.20455	7.30717	7.47965	8.81422	8.54605	1.28673	2.43974	0.0150057	AI340239	G-2 and S-phase expressed 1	GTSE1	NM_016426	0000085 // G2 phase of mitotic cell cycle // non-traceable author statement /// 0006977 // DNA damage response, signal transduction by p53 class mediator resulting in cell cycle arrest // non-traceable author statement /// 0007017 // microtubule-based process // non-traceable author statement	0005737 // cytoplasm // inferred from electronic annotation /// 0005874 // microtubule // inferred from electronic annotation /// 0005881 // cytoplasmic microtubule // non-traceable author statement	---	---
205053_at	PRIM1	3.2958	1.28648	0.390338	2.43932	0	4.34418	9.1388	9.16859	10.5671	10.3132	1.28648	2.43932	0.00972654	NM_000946	primase, DNA, polypeptide 1 (49kDa)	PRIM1	NM_000946	0006260 // DNA replication // inferred from electronic annotation /// 0006269 // DNA replication, synthesis of RNA primer // inferred from electronic annotation /// 0006269 // DNA replication, synthesis of RNA primer // traceable author statement /// 0006350 // transcription // inferred from electronic annotation	0005654 // nucleoplasm // not recorded /// 0005658 // alpha DNA polymerase:primase complex // inferred from electronic annotation	0003896 // DNA primase activity // inferred from electronic annotation /// 0003896 // DNA primase activity // traceable author statement /// 0003899 // DNA-directed RNA polymerase activity // inferred from electronic annotation /// 0005515 // protein binding // inferred from electronic annotation /// 0016740 // transferase activity // inferred from electronic annotation /// 0016779 // nucleotidyl…	DNA_replication_Reactome // GenMAPP /// G1_to_S_cell_cycle_Reactome // GenMAPP
224824_at	FAM36A	2.90905	1.28539	0.441857	2.43747	0	7.41103	7.34121	7.51312	8.86994	8.55516	1.28539	2.43747	0.0189138	AV694386	family with sequence similarity 36, member A	FAM36A	NM_198076	---	0016020 // membrane // inferred from electronic annotation /// 0016021 // integral to membrane // inferred from electronic annotation	---	---
1570153_at	C13orf38	3.29658	1.28477	0.389728	2.43643	0	4.33881	6.97693	7.07145	8.42706	8.19087	1.28477	2.43643	0.00966048	BC013944	chromosome 13 open reading frame 38	C13orf38	NM_001144981 /// NM_001144982 /// NM_001144983 /// NM_001144984 /// NM_001144985 /// NM_001144986	---	---	---	---
208010_s_at	PTPN22	1.67189	1.28424	0.76814	2.43554	0.143798	22.2271	4.60807	4.42476	6.29789	5.30342	1.28424	2.43554	0.126298	NM_012411	protein tyrosine phosphatase, non-receptor type 22 (lymphoid)	PTPN22	NM_001193431 /// NM_012411 /// NM_015967	0006470 // protein dephosphorylation // inferred from electronic annotation /// 0006470 // protein dephosphorylation // traceable author statement /// 0007165 // signal transduction // traceable author statement /// 0016311 // dephosphorylation // inferred from electronic annotation /// 0050860 // negative regulation of T cell receptor signaling pathway // inferred from direct assay	0005737 // cytoplasm // inferred from electronic annotation	0004721 // phosphoprotein phosphatase activity // inferred from electronic annotation /// 0004725 // protein tyrosine phosphatase activity // inferred from direct assay /// 0004725 // protein tyrosine phosphatase activity // inferred from electronic annotation /// 0004725 // protein tyrosine phosphatase activity // traceable author statement /// 0004872 // receptor activity // inferred from elect…	---
203821_at	HBEGF	3.72253	1.28403	0.344934	2.43518	0	1.84532	8.31755	8.47067	9.64765	9.70863	1.28403	2.43518	0.00409354	NM_001945	heparin-binding EGF-like growth factor	HBEGF	NM_001945	0007165 // signal transduction // traceable author statement /// 0007173 // epidermal growth factor receptor signaling pathway // inferred from mutant phenotype /// 0007173 // epidermal growth factor receptor signaling pathway // inferred from electronic annotation /// 0007517 // muscle organ development // traceable author statement /// 0008016 // regulation of heart contraction // inferred from…	0005576 // extracellular region // inferred from electronic annotation /// 0005615 // extracellular space // inferred from direct assay /// 0005615 // extracellular space // inferred from sequence or structural similarity /// 0005615 // extracellular space // traceable author statement /// 0005615 // extracellular space // inferred from electronic annotation /// 0005886 // plasma membrane // infe…	0004872 // receptor activity // inferred from electronic annotation /// 0005154 // epidermal growth factor receptor binding // inferred from electronic annotation /// 0005154 // epidermal growth factor receptor binding // traceable author statement /// 0008083 // growth factor activity // inferred from electronic annotation /// 0008201 // heparin binding // inferred from mutant phenotype /// 0008…	Hypertrophy_model // GenMAPP
219299_at	TRMT12	3.69017	1.28062	0.347036	2.42944	0	2.0048	7.87163	7.83419	9.05113	9.21594	1.28062	2.42944	0.00432647	NM_017956	tRNA methyltransferase 12 homolog (S. cerevisiae)	TRMT12	NM_017956	0008033 // tRNA processing // inferred from electronic annotation	---	0008168 // methyltransferase activity // inferred from electronic annotation /// 0016740 // transferase activity // inferred from electronic annotation	---
221676_s_at	CORO1C	3.18671	1.27967	0.401565	2.42783	0	5.12861	10.9945	11.222	12.308	12.4679	1.27967	2.42783	0.0116	BC002342	coronin, actin binding protein, 1C	CORO1C	NM_014325	0006909 // phagocytosis // traceable author statement /// 0007165 // signal transduction // traceable author statement	0015629 // actin cytoskeleton // traceable author statement	0003779 // actin binding // inferred from electronic annotation	---
209301_at	CA2	2.5385	1.27951	0.504042	2.42757	0.0391894	11.1031	5.59121	5.73959	7.17475	6.71507	1.27951	2.42757	0.0338309	M36532	carbonic anhydrase II	CA2	NM_000067	0001822 // kidney development // inferred from electronic annotation /// 0002009 // morphogenesis of an epithelium // inferred from electronic annotation /// 0006730 // one-carbon metabolic process // inferred from electronic annotation /// 0006950 // response to stress // inferred from electronic annotation /// 0009268 // response to pH // inferred from electronic annotation /// 0010033 // respo…	0005615 // extracellular space // inferred from electronic annotation /// 0005634 // nucleus // inferred from direct assay /// 0005737 // cytoplasm // inferred from direct assay /// 0005737 // cytoplasm // inferred from electronic annotation /// 0005829 // cytosol // inferred from electronic annotation /// 0005902 // microvillus // inferred from electronic annotation /// 0016323 // basolateral pl…	0004089 // carbonate dehydratase activity // inferred from electronic annotation /// 0004089 // carbonate dehydratase activity // traceable author statement /// 0005515 // protein binding // inferred from electronic annotation /// 0008270 // zinc ion binding // inferred from direct assay /// 0008270 // zinc ion binding // inferred from electronic annotation /// 0016829 // lyase activity // inferr…	---
201110_s_at	THBS1	3.33891	1.27788	0.382723	2.42482	0	4.05121	5.31094	5.16403	6.6105	6.42023	1.27788	2.42482	0.00873138	NM_003246	thrombospondin 1	THBS1	NM_003246	0000187 // activation of MAPK activity // inferred from mutant phenotype /// 0001666 // response to hypoxia // non-traceable author statement /// 0001937 // negative regulation of endothelial cell proliferation // inferred from direct assay /// 0001937 // negative regulation of endothelial cell proliferation // inferred from mutant phenotype /// 0001953 // negative regulation of cell-matrix adhes…	0005576 // extracellular region // not recorded /// 0005576 // extracellular region // inferred from electronic annotation /// 0005577 // fibrinogen complex // inferred from direct assay /// 0005615 // extracellular space // inferred from direct assay /// 0005615 // extracellular space // inferred from electronic annotation /// 0009897 // external side of plasma membrane // inferred from direct a…	0001786 // phosphatidylserine binding // inferred from direct assay /// 0001948 // glycoprotein binding // non-traceable author statement /// 0001968 // fibronectin binding // inferred from direct assay /// 0005178 // integrin binding // inferred from mutant phenotype /// 0005198 // structural molecule activity // inferred from electronic annotation /// 0005509 // calcium ion binding // non-trace…	Inflammatory_Response_Pathway // GenMAPP /// TGF_Beta_Signaling_Pathway // GenMAPP
228378_at	C12orf29	3.13875	1.26833	0.404088	2.40883	0	5.4932	8.19449	8.22395	9.61835	9.33676	1.26833	2.40883	0.0122291	BF439204	chromosome 12 open reading frame 29	C12orf29	NM_001009894	---	---	---	---
214697_s_at	ROD1	2.16571	1.26557	0.584368	2.40422	0.0523603	15.5321	7.92807	7.93167	9.51727	8.8736	1.26557	2.40422	0.0590048	AW190873	ROD1 regulator of differentiation 1 (S. pombe)	ROD1	NM_001163788 /// NM_001163790 /// NM_005156	0006397 // mRNA processing // inferred from electronic annotation /// 0009653 // anatomical structure morphogenesis // traceable author statement /// 0045595 // regulation of cell differentiation // inferred from electronic annotation	0005634 // nucleus // inferred from electronic annotation	0000166 // nucleotide binding // inferred from electronic annotation /// 0003676 // nucleic acid binding // inferred from electronic annotation /// 0003723 // RNA binding // inferred from electronic annotation /// 0003723 // RNA binding // traceable author statement	---
205010_at	GNL3L	2.97639	1.26449	0.42484	2.40242	0	6.81911	7.98117	8.09394	9.45425	9.14984	1.26449	2.40242	0.0160804	NM_019067	guanine nucleotide binding protein-like 3 (nucleolar)-like	GNL3L	NM_001184819 /// NM_019067	0042254 // ribosome biogenesis // inferred from electronic annotation	0005622 // intracellular // inferred from electronic annotation /// 0005634 // nucleus // inferred from electronic annotation /// 0005730 // nucleolus // inferred from electronic annotation	0000166 // nucleotide binding // inferred from electronic annotation /// 0005525 // GTP binding // inferred from electronic annotation	---
219493_at	SHCBP1	2.37759	1.26338	0.53137	2.40057	0.0523603	12.9309	8.68293	8.72365	10.2347	9.6986	1.26338	2.40057	0.0424218	NM_024745	SHC SH2-domain binding protein 1	SHCBP1	NM_024745	---	---	0005515 // protein binding // inferred from physical interaction /// 0005515 // protein binding // inferred from electronic annotation /// 0042169 // SH2 domain binding // inferred from electronic annotation	---
202085_at	TJP2	2.86295	1.26112	0.440496	2.39681	0	7.83042	9.16209	9.26907	10.6464	10.307	1.26112	2.39681	0.0193388	NM_004817	tight junction protein 2 (zona occludens 2)	TJP2	NM_001170414 /// NM_001170415 /// NM_001170416 /// NM_001170630 /// NM_004817 /// NM_201629	0010033 // response to organic substance // inferred from electronic annotation	0005634 // nucleus // inferred from electronic annotation /// 0005737 // cytoplasm // inferred from direct assay /// 0005886 // plasma membrane // not recorded /// 0005886 // plasma membrane // inferred from direct assay /// 0005886 // plasma membrane // inferred from electronic annotation /// 0005912 // adherens junction // inferred from electronic annotation /// 0005921 // gap junction // infer…	0004385 // guanylate kinase activity // traceable author statement /// 0005515 // protein binding // inferred from physical interaction /// 0005515 // protein binding // inferred from electronic annotation /// 0008022 // protein C-terminus binding // inferred from electronic annotation	---
206055_s_at	SNRPA1	2.65135	1.26019	0.4753	2.39527	0	9.90164	9.34893	9.12958	10.6818	10.3171	1.26019	2.39527	0.0273439	NM_003090	small nuclear ribonucleoprotein polypeptide A'	SNRPA1	NM_003090	0000398 // nuclear mRNA splicing, via spliceosome // inferred by curator /// 0006397 // mRNA processing // inferred from electronic annotation /// 0008380 // RNA splicing // not recorded /// 0008380 // RNA splicing // inferred from electronic annotation /// 0008380 // RNA splicing // traceable author statement	0005634 // nucleus // inferred from electronic annotation /// 0005681 // spliceosomal complex // inferred from direct assay /// 0005681 // spliceosomal complex // inferred from electronic annotation /// 0005686 // U2 snRNP // traceable author statement /// 0030529 // ribonucleoprotein complex // inferred from electronic annotation /// 0030532 // small nuclear ribonucleoprotein complex // traceabl…	0003676 // nucleic acid binding // inferred from electronic annotation /// 0003723 // RNA binding // inferred from electronic annotation /// 0005515 // protein binding // inferred from physical interaction	mRNA_processing_Reactome // GenMAPP
228069_at	FAM54A	2.48817	1.25857	0.505823	2.39259	0.0391894	11.6604	8.03508	8.05553	9.54696	9.0608	1.25857	2.39259	0.0353969	AL138828	family with sequence similarity 54, member A	FAM54A	NM_001099286 /// NM_138419	---	---	---	---
205190_at	PLS1	3.07942	1.25516	0.407596	2.38693	0	5.9613	8.14429	8.11295	9.528	9.23956	1.25516	2.38693	0.0130964	NM_002670	plastin 1	PLS1	NM_001145319 /// NM_001172312 /// NM_002670	---	0005737 // cytoplasm // inferred from electronic annotation	0003779 // actin binding // inferred from electronic annotation /// 0005200 // structural constituent of cytoskeleton // traceable author statement /// 0005509 // calcium ion binding // inferred from electronic annotation /// 0051015 // actin filament binding // traceable author statement	---
222730_s_at	ZDHHC2	2.26013	1.25512	0.555334	2.38688	0.0523603	14.3477	7.52305	7.62021	9.1155	8.538	1.25512	2.38688	0.0503488	AI814257	zinc finger, DHHC-type containing 2	ZDHHC2	NM_016353	0018345 // protein palmitoylation // inferred from electronic annotation	0016020 // membrane // inferred from electronic annotation /// 0016021 // integral to membrane // inferred from electronic annotation	0008270 // zinc ion binding // inferred from electronic annotation /// 0008415 // acyltransferase activity // inferred from electronic annotation /// 0016409 // palmitoyltransferase activity // inferred from electronic annotation /// 0016740 // transferase activity // inferred from electronic annotation /// 0046872 // metal ion binding // inferred from electronic annotation	---
234992_x_at	ECT2	1.86766	1.25476	0.671834	2.38627	0.143798	19.4909	8.62245	8.06949	9.90254	9.29892	1.25476	2.38627	0.0919655	BG170335	epithelial cell transforming sequence 2 oncogene	ECT2	NM_018098	0000902 // cell morphogenesis // inferred from electronic annotation /// 0006915 // apoptosis // not recorded /// 0008624 // induction of apoptosis by extracellular signals // not recorded /// 0035023 // regulation of Rho protein signal transduction // inferred from electronic annotation /// 0043123 // positive regulation of I-kappaB kinase/NF-kappaB cascade // inferred from mutant phenotype	0005622 // intracellular // inferred from electronic annotation /// 0005829 // cytosol // not recorded	0004871 // signal transducer activity // inferred from mutant phenotype /// 0005085 // guanyl-nucleotide exchange factor activity // not recorded /// 0005085 // guanyl-nucleotide exchange factor activity // inferred from electronic annotation /// 0005089 // Rho guanyl-nucleotide exchange factor activity // inferred from electronic annotation /// 0005515 // protein binding // inferred from physica…	---
235498_at	LRRIQ3	2.74381	1.25164	0.456171	2.38113	0	8.96726	5.42879	5.23775	6.75336	6.41647	1.25164	2.38113	0.0231091	AI269596	leucine-rich repeats and IQ motif containing 3	LRRIQ3	NM_001105659	---	---	0005515 // protein binding // inferred from electronic annotation	---
219014_at	PLAC8	3.22373	1.24846	0.387273	2.37588	0	4.85544	9.98756	10.2071	11.2865	11.4051	1.24846	2.37588	0.00983678	NM_016619	placenta-specific 8	PLAC8	NM_001130715 /// NM_001130716 /// NM_016619	---	---	---	---
212801_at	CIT	2.57867	1.24831	0.484091	2.37563	0.0391894	10.6678	8.215	8.44673	9.76803	9.39032	1.24831	2.37563	0.0300884	AI861788	citron (rho-interacting, serine/threonine kinase 21)	CIT	NM_007174	0000070 // mitotic sister chromatid segregation // inferred from electronic annotation /// 0000086 // G2/M transition of mitotic cell cycle // inferred from electronic annotation /// 0000910 // cytokinesis // inferred from electronic annotation /// 0006468 // protein phosphorylation // inferred from electronic annotation /// 0007030 // Golgi organization // inferred from electronic annotation ///…	0001726 // ruffle // inferred from electronic annotation /// 0005737 // cytoplasm // inferred from electronic annotation /// 0005773 // vacuole // inferred from electronic annotation /// 0005794 // Golgi apparatus // inferred from electronic annotation /// 0015629 // actin cytoskeleton // inferred from electronic annotation	0000166 // nucleotide binding // inferred from electronic annotation /// 0004672 // protein kinase activity // inferred from electronic annotation /// 0004674 // protein serine/threonine kinase activity // inferred from sequence or structural similarity /// 0004674 // protein serine/threonine kinase activity // inferred from electronic annotation /// 0005083 // small GTPase regulator activity // …	G13_Signaling_Pathway // GenMAPP
229963_at	BEX5	2.58194	1.24358	0.481646	2.36785	0.0391894	10.6327	7.68221	7.25662	8.66073	8.76526	1.24358	2.36785	0.0296715	AV726956	brain expressed, X-linked 5	BEX5	NM_001012978 /// NM_001159560	---	0005737 // cytoplasm // inferred from electronic annotation	---	---
214446_at	ELL2	3.32046	1.2399	0.373411	2.36182	0	4.17543	7.58083	7.37576	8.67599	8.7604	1.2399	2.36182	0.00790304	NM_012081	elongation factor, RNA polymerase II, 2	ELL2	NM_012081	0006350 // transcription // inferred from electronic annotation /// 0006368 // RNA elongation from RNA polymerase II promoter // inferred from electronic annotation /// 0006368 // RNA elongation from RNA polymerase II promoter // traceable author statement /// 0045449 // regulation of transcription // inferred from electronic annotation	0005634 // nucleus // inferred from electronic annotation /// 0008023 // transcription elongation factor complex // inferred from electronic annotation /// 0008023 // transcription elongation factor complex // traceable author statement	0003702 // RNA polymerase II transcription factor activity // traceable author statement /// 0003746 // translation elongation factor activity // inferred from electronic annotation /// 0016944 // RNA polymerase II transcription elongation factor activity // inferred from electronic annotation	---
212097_at	CAV1	3.61198	1.23916	0.343069	2.36061	0	2.40975	11.2074	11.0953	12.4483	12.3327	1.23916	2.36061	0.00419806	AU147399	caveolin 1, caveolae protein, 22kDa	CAV1	NM_001172895 /// NM_001172896 /// NM_001172897 /// NM_001753	0000165 // MAPKKK cascade // inferred from electronic annotation /// 0000188 // inactivation of MAPK activity // inferred from sequence or structural similarity /// 0000188 // inactivation of MAPK activity // inferred from electronic annotation /// 0001570 // vasculogenesis // inferred from sequence or structural similarity /// 0001570 // vasculogenesis // inferred from electronic annotation /// …	0000139 // Golgi membrane // not recorded /// 0000139 // Golgi membrane // inferred from direct assay /// 0000139 // Golgi membrane // inferred from electronic annotation /// 0000299 // integral to membrane of membrane fraction // inferred from electronic annotation /// 0005622 // intracellular // inferred from direct assay /// 0005624 // membrane fraction // inferred from electronic annotation /…	0000149 // SNARE binding // inferred from electronic annotation /// 0005102 // receptor binding // inferred from physical interaction /// 0005198 // structural molecule activity // inferred from direct assay /// 0005515 // protein binding // inferred from physical interaction /// 0005515 // protein binding // inferred from electronic annotation /// 0008022 // protein C-terminus binding // inferre…	Integrin-mediated_cell_adhesion_KEGG // GenMAPP
210821_x_at	CENPA	3.14664	1.23386	0.392119	2.35195	0	5.43237	7.79324	8.05235	9.15364	9.15966	1.23386	2.35195	0.0108519	BC002703	centromere protein A	CENPA	NM_001042426 /// NM_001809	0000132 // establishment of mitotic spindle orientation // inferred from mutant phenotype /// 0006334 // nucleosome assembly // inferred from electronic annotation /// 0044419 // interspecies interaction between organisms // inferred from electronic annotation /// 0051382 // kinetochore assembly // inferred from direct assay /// 0071459 // protein localization to chromosome, centromeric region //…	0000775 // chromosome, centromeric region // inferred from direct assay /// 0000775 // chromosome, centromeric region // inferred from electronic annotation /// 0000775 // chromosome, centromeric region // traceable author statement /// 0000776 // kinetochore // inferred from electronic annotation /// 0000777 // condensed chromosome kinetochore // inferred from electronic annotation /// 0000778 /…	0003677 // DNA binding // inferred from electronic annotation /// 0003682 // chromatin binding // traceable author statement /// 0005515 // protein binding // inferred from physical interaction	---
209340_at	UAP1	3.2773	1.23219	0.375979	2.34924	0	4.47285	11.4405	11.2155	12.5749	12.5455	1.23219	2.34924	0.00837106	S73498	UDP-N-acteylglucosamine pyrophosphorylase 1	UAP1	NM_003115	0006048 // UDP-N-acetylglucosamine biosynthetic process // traceable author statement /// 0006488 // dolichol-linked oligosaccharide biosynthetic process // not recorded /// 0008152 // metabolic process // inferred from electronic annotation	0005634 // nucleus // inferred from direct assay /// 0005730 // nucleolus // inferred from direct assay /// 0005737 // cytoplasm // inferred from direct assay /// 0005737 // cytoplasm // inferred from electronic annotation /// 0005829 // cytosol // not recorded	0003977 // UDP-N-acetylglucosamine diphosphorylase activity // not recorded /// 0003977 // UDP-N-acetylglucosamine diphosphorylase activity // inferred from electronic annotation /// 0003977 // UDP-N-acetylglucosamine diphosphorylase activity // traceable author statement /// 0016740 // transferase activity // inferred from electronic annotation /// 0016779 // nucleotidyltransferase activity // i…	---
208511_at	PTTG3P	2.58925	1.23194	0.475788	2.34882	0	10.5544	7.42126	7.84377	8.83528	8.89362	1.23194	2.34882	0.028684	NM_021000	pituitary tumor-transforming 3 (pseudogene)	PTTG3P	NR_002734	0006259 // DNA metabolic process // inferred from electronic annotation /// 0051276 // chromosome organization // inferred from electronic annotation	0005634 // nucleus // inferred from direct assay /// 0005634 // nucleus // inferred from electronic annotation /// 0005737 // cytoplasm // inferred from direct assay /// 0005737 // cytoplasm // inferred from electronic annotation	0017124 // SH3 domain binding // inferred from electronic annotation	---
203432_at	TMPO	3.81139	1.23176	0.323179	2.34854	0	1.43105	9.95958	10.013	11.2725	11.1636	1.23176	2.34854	0.00241575	AW272611	thymopoietin	TMPO	NM_001032283 /// NM_001032284 /// NM_003276	0045449 // regulation of transcription // inferred from electronic annotation	0000785 // chromatin // inferred from direct assay /// 0005634 // nucleus // inferred from direct assay /// 0005634 // nucleus // inferred from electronic annotation /// 0005634 // nucleus // traceable author statement /// 0005635 // nuclear envelope // inferred from electronic annotation /// 0005635 // nuclear envelope // traceable author statement /// 0005637 // nuclear inner membrane // inferr…	0003677 // DNA binding // inferred from electronic annotation /// 0005515 // protein binding // inferred from physical interaction /// 0005515 // protein binding // inferred from electronic annotation /// 0005521 // lamin binding // traceable author statement	---
225847_at	NCEH1	2.41316	1.22352	0.507017	2.33515	0.0523603	12.5153	9.06518	9.41257	10.6344	10.2903	1.22352	2.33515	0.0376874	AB037784	neutral cholesterol ester hydrolase 1	NCEH1	NM_001146276 /// NM_001146277 /// NM_001146278 /// NM_020792	0006470 // protein dephosphorylation // inferred from electronic annotation /// 0006805 // xenobiotic metabolic process // inferred from electronic annotation /// 0008152 // metabolic process // inferred from electronic annotation /// 0016042 // lipid catabolic process // inferred from electronic annotation	0005783 // endoplasmic reticulum // inferred from electronic annotation /// 0005792 // microsome // inferred from electronic annotation /// 0016020 // membrane // inferred from electronic annotation /// 0016021 // integral to membrane // inferred from electronic annotation	0004091 // carboxylesterase activity // inferred from electronic annotation /// 0016787 // hydrolase activity // inferred from electronic annotation /// 0017171 // serine hydrolase activity // inferred from electronic annotation /// 0042301 // phosphate binding // inferred from electronic annotation	---
230380_at	LOC100289049	2.13968	1.2212	0.57074	2.33141	0.0904263	15.8652	5.58246	5.08304	6.73461	6.37329	1.2212	2.33141	0.0581934	AW235671	Hypothetical protein LOC100289049	LOC100289049	---	---	---	---	---
211679_x_at	GABBR2	3.06506	1.22082	0.398301	2.33079	0	6.07739	8.08224	8.34114	9.39155	9.47345	1.22082	2.33079	0.012144	AF095784	gamma-aminobutyric acid (GABA) B receptor, 2	GABBR2	NM_005458	0007165 // signal transduction // inferred from electronic annotation /// 0007186 // G-protein coupled receptor protein signaling pathway // traceable author statement /// 0007186 // G-protein coupled receptor protein signaling pathway // inferred from electronic annotation /// 0007194 // negative regulation of adenylate cyclase activity // traceable author statement /// 0007214 // gamma-aminobut…	0005737 // cytoplasm // inferred from electronic annotation /// 0005886 // plasma membrane // not recorded /// 0005886 // plasma membrane // inferred from electronic annotation /// 0005887 // integral to plasma membrane // traceable author statement /// 0016020 // membrane // inferred from electronic annotation /// 0016021 // integral to membrane // inferred from electronic annotation /// 0030054…	0004871 // signal transducer activity // inferred from electronic annotation /// 0004872 // receptor activity // inferred from electronic annotation /// 0004930 // G-protein coupled receptor activity // inferred from electronic annotation /// 0004965 // GABA-B receptor activity // inferred from electronic annotation /// 0004965 // GABA-B receptor activity // traceable author statement /// 0005515…	GPCRDB_Class_C_Metabotropic_glutamate_pheromone // GenMAPP
219502_at	NEIL3	2.8453	1.21962	0.428644	2.32886	0	7.99402	7.16112	7.08599	8.18136	8.50499	1.21962	2.32886	0.0180506	NM_018248	nei endonuclease VIII-like 3 (E. coli)	NEIL3	NM_018248	0006281 // DNA repair // inferred from electronic annotation /// 0006284 // base-excision repair // inferred from sequence or structural similarity /// 0006284 // base-excision repair // inferred from electronic annotation /// 0006289 // nucleotide-excision repair // inferred from electronic annotation /// 0006974 // response to DNA damage stimulus // inferred from electronic annotation /// 00081…	0005622 // intracellular // inferred from electronic annotation /// 0005634 // nucleus // inferred from direct assay /// 0005634 // nucleus // inferred from electronic annotation	0000405 // bubble DNA binding // inferred from sequence or structural similarity /// 0000405 // bubble DNA binding // inferred from electronic annotation /// 0003676 // nucleic acid binding // inferred from electronic annotation /// 0003677 // DNA binding // inferred from electronic annotation /// 0003684 // damaged DNA binding // inferred from electronic annotation /// 0003690 // double-stranded…	---
218156_s_at	TSR1	3.25356	1.21786	0.374318	2.32602	0	4.64056	9.21583	9.37601	10.5918	10.4358	1.21786	2.32602	0.00832076	NM_018128	TSR1, 20S rRNA accumulation, homolog (S. cerevisiae)	TSR1	NM_018128	0042254 // ribosome biogenesis // inferred from electronic annotation /// 0042255 // ribosome assembly // inferred from sequence or structural similarity	0005634 // nucleus // inferred from electronic annotation /// 0005730 // nucleolus // inferred from sequence or structural similarity /// 0005730 // nucleolus // inferred from electronic annotation	0005515 // protein binding // inferred from physical interaction	---
213476_x_at	TUBB3	3.52535	1.21687	0.345179	2.32443	0	2.89147	11.7084	11.8584	12.9655	13.0351	1.21688	2.32443	0.00458155	AL565749	tubulin, beta 3	TUBB3	NM_001197181 /// NM_006086	0007017 // microtubule-based process // inferred from electronic annotation /// 0007018 // microtubule-based movement // inferred from electronic annotation /// 0007067 // mitosis // inferred from electronic annotation /// 0007165 // signal transduction // inferred from electronic annotation /// 0007186 // G-protein coupled receptor protein signaling pathway // inferred from electronic annotation…	0005622 // intracellular // inferred from electronic annotation /// 0005737 // cytoplasm // inferred from electronic annotation /// 0005874 // microtubule // inferred from electronic annotation /// 0005886 // plasma membrane // inferred from electronic annotation /// 0005886 // plasma membrane // inferred from direct assay /// 0005887 // integral to plasma membrane // traceable author statement /…	0000166 // nucleotide binding // inferred from electronic annotation /// 0003924 // GTPase activity // inferred from electronic annotation /// 0004871 // signal transducer activity // inferred from electronic annotation /// 0004872 // receptor activity // inferred from electronic annotation /// 0004930 // G-protein coupled receptor activity // inferred from electronic annotation /// 0004977 // me…	Circadian_Exercise // GenMAPP /// GPCRDB_Class_A_Rhodopsin-like // GenMAPP /// Peptide_GPCRs // GenMAPP			TUBB3	tubulin, beta 3; melanocortin 1 receptor (alpha melanocyte stimulating hormone receptor)
222606_at	ZWILCH	3.38825	1.21655	0.35905	2.3239	0	3.72752	8.79536	8.69636	10.0453	9.87955	1.21655	2.3239	0.00623618	AA824298	Zwilch, kinetochore associated, homolog (Drosophila)	ZWILCH	NM_017975 /// NR_003105	0007049 // cell cycle // inferred from electronic annotation /// 0007067 // mitosis // inferred from electronic annotation /// 0007093 // mitotic cell cycle checkpoint // inferred from mutant phenotype /// 0051301 // cell division // inferred from electronic annotation	0000775 // chromosome, centromeric region // inferred from electronic annotation /// 0000776 // kinetochore // inferred from direct assay /// 0000776 // kinetochore // inferred from electronic annotation /// 0000777 // condensed chromosome kinetochore // inferred from electronic annotation	0005515 // protein binding // inferred from physical interaction	---
222778_s_at	WHSC1	3.05531	1.21604	0.398009	2.32308	0	6.15684	7.85838	8.10672	9.25278	9.1444	1.21604	2.32308	0.0121862	AW024870	Wolf-Hirschhorn syndrome candidate 1	WHSC1	NM_001042424 /// NM_007331 /// NM_133330 /// NM_133331 /// NM_133334 /// NM_133335	0006350 // transcription // inferred from electronic annotation /// 0009653 // anatomical structure morphogenesis // traceable author statement /// 0016568 // chromatin modification // inferred from electronic annotation /// 0045449 // regulation of transcription // inferred from electronic annotation	0005634 // nucleus // inferred from direct assay /// 0005634 // nucleus // inferred from electronic annotation /// 0005730 // nucleolus // inferred from direct assay /// 0005737 // cytoplasm // inferred from electronic annotation /// 0031965 // nuclear membrane // inferred from direct assay	0003677 // DNA binding // inferred from electronic annotation /// 0005515 // protein binding // inferred from electronic annotation /// 0008168 // methyltransferase activity // inferred from electronic annotation /// 0008270 // zinc ion binding // inferred from electronic annotation /// 0016740 // transferase activity // inferred from electronic annotation /// 0018024 // histone-lysine N-methyltr…	---
1554696_s_at	TYMS	4.1429	1.21379	0.292981	2.31946	0	0.173734	10.2398	10.2953	11.4688	11.4938	1.21379	2.31946	0.000628899	AB077208	thymidylate synthetase	TYMS	NM_001071	0006139 // nucleobase, nucleoside, nucleotide and nucleic acid metabolic process // traceable author statement /// 0006231 // dTMP biosynthetic process // inferred from electronic annotation /// 0006260 // DNA replication // non-traceable author statement /// 0006281 // DNA repair // non-traceable author statement /// 0009157 // deoxyribonucleoside monophosphate biosynthetic process // traceable …	---	0000166 // nucleotide binding // inferred from electronic annotation /// 0004799 // thymidylate synthase activity // inferred from electronic annotation /// 0008168 // methyltransferase activity // inferred from electronic annotation /// 0016740 // transferase activity // inferred from electronic annotation /// 0048037 // cofactor binding // inferred from electronic annotation	---			TYMS	thymidylate synthetase
219960_s_at	UCHL5	2.41611	1.21187	0.501581	2.31638	0.0523603	12.4812	8.67505	8.80785	10.183	9.72368	1.21187	2.31638	0.036778	NM_015984	ubiquitin carboxyl-terminal hydrolase L5	UCHL5	NM_015984	0006511 // ubiquitin-dependent protein catabolic process // inferred from electronic annotation /// 0016579 // protein deubiquitination // inferred from direct assay /// 0061136 // regulation of proteasomal protein catabolic process // inferred from mutant phenotype	0000502 // proteasome complex // inferred from electronic annotation /// 0005622 // intracellular // inferred from electronic annotation /// 0005634 // nucleus // inferred from direct assay /// 0005634 // nucleus // inferred from electronic annotation /// 0005737 // cytoplasm // inferred from electronic annotation /// 0005829 // cytosol // inferred from direct assay /// 0031011 // Ino80 complex /…	0004221 // ubiquitin thiolesterase activity // inferred from electronic annotation /// 0004843 // ubiquitin-specific protease activity // inferred from direct assay /// 0004866 // endopeptidase inhibitor activity // inferred from mutant phenotype /// 0005515 // protein binding // inferred from physical interaction /// 0008233 // peptidase activity // inferred from electronic annotation /// 000823…	---
209773_s_at	RRM2	4.16704	1.21097	0.290605	2.31492	0	0.0986154	11.4056	11.3639	12.5769	12.6145	1.21097	2.31492	0.000537177	BC001886	ribonucleotide reductase M2	RRM2	NM_001034 /// NM_001165931	0006260 // DNA replication // non-traceable author statement /// 0006260 // DNA replication // inferred from electronic annotation /// 0009186 // deoxyribonucleoside diphosphate metabolic process // inferred from electronic annotation /// 0009262 // deoxyribonucleotide metabolic process // inferred from electronic annotation /// 0009263 // deoxyribonucleotide biosynthetic process // inferred from…	0005737 // cytoplasm // non-traceable author statement /// 0005737 // cytoplasm // inferred from electronic annotation	0004748 // ribonucleoside-diphosphate reductase activity // inferred from sequence or structural similarity /// 0004748 // ribonucleoside-diphosphate reductase activity // non-traceable author statement /// 0004748 // ribonucleoside-diphosphate reductase activity // inferred from electronic annotation /// 0005515 // protein binding // inferred from electronic annotation /// 0016491 // oxidoreduct…	---
203216_s_at	MYO6	2.17961	1.21086	0.55554	2.31475	0.0523603	15.3554	8.19136	8.39381	9.77842	9.22847	1.21086	2.31475	0.0538698	NM_004999	myosin VI	MYO6	NM_004999	0006605 // protein targeting // inferred from electronic annotation /// 0006810 // transport // inferred from electronic annotation /// 0006886 // intracellular protein transport // inferred from sequence or structural similarity /// 0006897 // endocytosis // inferred from mutant phenotype /// 0006897 // endocytosis // inferred from sequence or structural similarity /// 0006897 // endocytosis // …	0001726 // ruffle // inferred from direct assay /// 0005634 // nucleus // inferred from direct assay /// 0005634 // nucleus // inferred from electronic annotation /// 0005654 // nucleoplasm // inferred from direct assay /// 0005737 // cytoplasm // inferred from direct assay /// 0005737 // cytoplasm // inferred from sequence or structural similarity /// 0005737 // cytoplasm // inferred from electr…	0000166 // nucleotide binding // inferred from electronic annotation /// 0003774 // motor activity // inferred from sequence or structural similarity /// 0003774 // motor activity // inferred from electronic annotation /// 0003779 // actin binding // traceable author statement /// 0003779 // actin binding // inferred from electronic annotation /// 0005515 // protein binding // inferred from physi…	---
203790_s_at	HRSP12	3.23822	1.21008	0.373685	2.3135	0	4.75046	8.79913	8.70106	9.86041	10.0599	1.21008	2.3135	0.00833296	N54448	heat-responsive protein 12	HRSP12	NM_005836	0006449 // regulation of translational termination // traceable author statement	0005634 // nucleus // inferred from electronic annotation /// 0005634 // nucleus // traceable author statement /// 0005737 // cytoplasm // inferred from electronic annotation /// 0005737 // cytoplasm // traceable author statement /// 0005739 // mitochondrion // inferred from electronic annotation	0004518 // nuclease activity // inferred from electronic annotation /// 0004519 // endonuclease activity // inferred from electronic annotation /// 0016787 // hydrolase activity // inferred from electronic annotation	---
221884_at	MECOM	2.76748	1.20701	0.43614	2.30859	0	8.73529	9.17242	9.15486	10.544	10.1973	1.20701	2.30859	0.0200683	BE466525	MDS1 and EVI1 complex locus	MECOM	NM_001105077 /// NM_001105078 /// NM_001163999 /// NM_001164000 /// NM_004991 /// NM_005241	0001701 // in utero embryonic development // inferred from electronic annotation /// 0001780 // neutrophil homeostasis // inferred from electronic annotation /// 0006350 // transcription // inferred from electronic annotation /// 0006355 // regulation of transcription, DNA-dependent // inferred from electronic annotation /// 0006915 // apoptosis // inferred from electronic annotation /// 0006954 …	0000118 // histone deacetylase complex // inferred from direct assay /// 0005622 // intracellular // inferred from electronic annotation /// 0005634 // nucleus // inferred from direct assay /// 0005634 // nucleus // inferred from electronic annotation /// 0005634 // nucleus // traceable author statement /// 0016607 // nuclear speck // inferred from direct assay /// 0016607 // nuclear speck // inf…	0003676 // nucleic acid binding // inferred from electronic annotation /// 0003677 // DNA binding // inferred from sequence or structural similarity /// 0003677 // DNA binding // inferred from direct assay /// 0003677 // DNA binding // inferred from electronic annotation /// 0003700 // sequence-specific DNA binding transcription factor activity // inferred from direct assay /// 0003700 // sequenc…	---
236918_s_at	LRRC34	3.45742	1.20585	0.348773	2.30674	0	3.29421	6.0776	6.17303	7.40301	7.25933	1.20585	2.30674	0.0050765	AW975772	leucine rich repeat containing 34	LRRC34	NM_001172779 /// NM_001172780 /// NM_153353	---	---	0005515 // protein binding // inferred from electronic annotation	---
202007_at	NID1	2.74916	1.20469	0.438202	2.30487	0	8.91458	7.33108	7.28645	8.6877	8.3392	1.20469	2.30487	0.0206101	BF940043	nidogen 1	NID1	NM_002508	0007155 // cell adhesion // inferred from electronic annotation /// 0007160 // cell-matrix adhesion // inferred from electronic annotation /// 0008218 // bioluminescence // inferred from electronic annotation /// 0018298 // protein-chromophore linkage // inferred from electronic annotation	0005576 // extracellular region // inferred from electronic annotation /// 0005578 // proteinaceous extracellular matrix // inferred from electronic annotation /// 0005604 // basement membrane // inferred from electronic annotation /// 0016020 // membrane // inferred from electronic annotation /// 0031012 // extracellular matrix // inferred from direct assay	0005509 // calcium ion binding // inferred from electronic annotation /// 0005515 // protein binding // inferred from electronic annotation	---
220083_x_at	UCHL5	2.32067	1.20348	0.518589	2.30294	0.0523603	13.6091	6.83277	6.51555	8.07866	7.67661	1.20348	2.30294	0.0424112	NM_016017	ubiquitin carboxyl-terminal hydrolase L5	UCHL5	NM_015984	0006511 // ubiquitin-dependent protein catabolic process // inferred from electronic annotation /// 0016579 // protein deubiquitination // inferred from direct assay /// 0061136 // regulation of proteasomal protein catabolic process // inferred from mutant phenotype	0000502 // proteasome complex // inferred from electronic annotation /// 0005622 // intracellular // inferred from electronic annotation /// 0005634 // nucleus // inferred from direct assay /// 0005634 // nucleus // inferred from electronic annotation /// 0005737 // cytoplasm // inferred from electronic annotation /// 0005829 // cytosol // inferred from direct assay /// 0031011 // Ino80 complex /…	0004221 // ubiquitin thiolesterase activity // inferred from electronic annotation /// 0004843 // ubiquitin-specific protease activity // inferred from direct assay /// 0004866 // endopeptidase inhibitor activity // inferred from mutant phenotype /// 0005515 // protein binding // inferred from physical interaction /// 0008233 // peptidase activity // inferred from electronic annotation /// 000823…	---
207002_s_at	PLAGL1	2.11306	1.20245	0.569057	2.3013	0.0904263	16.2087	7.75246	7.86463	9.31235	8.70964	1.20245	2.3013	0.0592661	NM_002656	pleiomorphic adenoma gene-like 1	PLAGL1	NM_001080951 /// NM_001080952 /// NM_001080953 /// NM_001080954 /// NM_001080955 /// NM_001080956 /// NM_002656 /// NM_006718	0006350 // transcription // inferred from electronic annotation /// 0006917 // induction of apoptosis // traceable author statement /// 0007050 // cell cycle arrest // traceable author statement /// 0045449 // regulation of transcription // inferred from electronic annotation /// 0045944 // positive regulation of transcription from RNA polymerase II promoter // inferred from direct assay	0005622 // intracellular // inferred from electronic annotation /// 0005634 // nucleus // inferred from electronic annotation	0003676 // nucleic acid binding // inferred from electronic annotation /// 0003677 // DNA binding // inferred from direct assay /// 0003677 // DNA binding // inferred from electronic annotation /// 0005515 // protein binding // inferred from electronic annotation /// 0008270 // zinc ion binding // inferred from electronic annotation /// 0046872 // metal ion binding // inferred from electronic ann…	---
204005_s_at	PAWR	2.22771	1.20133	0.539265	2.29951	0.0523603	14.75	8.31934	8.44673	9.85367	9.31505	1.20133	2.29951	0.0491836	NM_002583	PRKC, apoptosis, WT1, regulator	PAWR	NM_002583	0000122 // negative regulation of transcription from RNA polymerase II promoter // traceable author statement /// 0006350 // transcription // inferred from electronic annotation /// 0006915 // apoptosis // traceable author statement /// 0006915 // apoptosis // inferred from electronic annotation /// 0008285 // negative regulation of cell proliferation // traceable author statement /// 0030889 // …	0005634 // nucleus // inferred from direct assay /// 0005634 // nucleus // non-traceable author statement /// 0005634 // nucleus // inferred from electronic annotation /// 0005634 // nucleus // traceable author statement /// 0005737 // cytoplasm // inferred from direct assay /// 0005737 // cytoplasm // non-traceable author statement /// 0005737 // cytoplasm // inferred from electronic annotation …	0003714 // transcription corepressor activity // traceable author statement /// 0005515 // protein binding // inferred from physical interaction /// 0005515 // protein binding // inferred from electronic annotation /// 0019899 // enzyme binding // inferred from direct assay /// 0043522 // leucine zipper domain binding // inferred from physical interaction	---
209026_x_at	TUBB	3.06581	1.19959	0.391281	2.29675	0	6.07127	11.6756	11.914	12.9458	13.043	1.1996	2.29675	0.0113246	AF141349	tubulin, beta	TUBB	NM_178014	0006928 // cellular component movement // traceable author statement /// 0007017 // microtubule-based process // inferred from electronic annotation /// 0007018 // microtubule-based movement // inferred from electronic annotation /// 0007067 // mitosis // inferred from electronic annotation /// 0030182 // neuron differentiation // inferred from electronic annotation /// 0042267 // natural killer …	0005829 // cytosol // not recorded /// 0005856 // cytoskeleton // traceable author statement /// 0005874 // microtubule // inferred from electronic annotation /// 0043234 // protein complex // inferred from electronic annotation	0000166 // nucleotide binding // inferred from electronic annotation /// 0003924 // GTPase activity // inferred from electronic annotation /// 0005198 // structural molecule activity // inferred from electronic annotation /// 0005200 // structural constituent of cytoskeleton // inferred from electronic annotation /// 0005525 // GTP binding // inferred from electronic annotation /// 0042277 // pep…	---
219017_at	ETNK1	3.01105	1.19743	0.39768	2.29331	0	6.52413	8.29181	8.32398	9.63952	9.37113	1.19743	2.29331	0.0125009	NM_018638	ethanolamine kinase 1	ETNK1	NM_001039481 /// NM_018638	0006646 // phosphatidylethanolamine biosynthetic process // inferred from direct assay /// 0008654 // phospholipid biosynthetic process // inferred from electronic annotation	0005737 // cytoplasm // non-traceable author statement /// 0005737 // cytoplasm // inferred from electronic annotation	0000166 // nucleotide binding // inferred from electronic annotation /// 0004305 // ethanolamine kinase activity // inferred from direct assay /// 0004305 // ethanolamine kinase activity // inferred from electronic annotation /// 0005524 // ATP binding // inferred from electronic annotation /// 0016301 // kinase activity // inferred from electronic annotation /// 0016740 // transferase activity /…	---
205909_at	POLE2	3.21862	1.19671	0.371809	2.29217	0	4.8927	7.98651	8.00234	9.30014	9.08215	1.19671	2.29217	0.00823617	NM_002692	polymerase (DNA directed), epsilon 2 (p59 subunit)	POLE2	NM_001197330 /// NM_001197331 /// NM_002692	0006260 // DNA replication // traceable author statement /// 0006260 // DNA replication // inferred from electronic annotation /// 0006261 // DNA-dependent DNA replication // inferred from electronic annotation /// 0006281 // DNA repair // traceable author statement /// 0006297 // nucleotide-excision repair, DNA gap filling // not recorded	0005634 // nucleus // inferred from electronic annotation /// 0005654 // nucleoplasm // not recorded	0003677 // DNA binding // inferred from electronic annotation /// 0003887 // DNA-directed DNA polymerase activity // inferred from electronic annotation /// 0003887 // DNA-directed DNA polymerase activity // traceable author statement /// 0016740 // transferase activity // inferred from electronic annotation /// 0016779 // nucleotidyltransferase activity // inferred from electronic annotation	DNA_replication_Reactome // GenMAPP /// G1_to_S_cell_cycle_Reactome // GenMAPP
209754_s_at	TMPO	3.22922	1.19367	0.369647	2.28734	0	4.81555	7.45615	7.6656	8.77707	8.73202	1.19367	2.28734	0.00795718	AF113682	thymopoietin	TMPO	NM_001032283 /// NM_001032284 /// NM_003276	0045449 // regulation of transcription // inferred from electronic annotation	0000785 // chromatin // inferred from direct assay /// 0005634 // nucleus // inferred from direct assay /// 0005634 // nucleus // inferred from electronic annotation /// 0005634 // nucleus // traceable author statement /// 0005635 // nuclear envelope // inferred from electronic annotation /// 0005635 // nuclear envelope // traceable author statement /// 0005637 // nuclear inner membrane // inferr…	0003677 // DNA binding // inferred from electronic annotation /// 0005515 // protein binding // inferred from physical interaction /// 0005515 // protein binding // inferred from electronic annotation /// 0005521 // lamin binding // traceable author statement	---
228107_at	LOC100127983	3.69802	1.19365	0.32278	2.2873	0	1.96569	8.17053	8.05335	9.31963	9.29154	1.19365	2.2873	0.0025383	BF510533	hypothetical protein LOC100127983	LOC100127983	NM_001190972	---	---	---	---
1552306_at	ALG10	3.79339	1.19154	0.314111	2.28397	0	1.5122	6.01589	6.10971	7.2329	7.27579	1.19154	2.28397	0.00186886	BC033730	asparagine-linked glycosylation 10, alpha-1,2-glucosyltransferase homolog (S. pombe)	ALG10	NM_032834	0006488 // dolichol-linked oligosaccharide biosynthetic process // not recorded	0005783 // endoplasmic reticulum // inferred from electronic annotation /// 0005789 // endoplasmic reticulum membrane // inferred from electronic annotation /// 0016020 // membrane // inferred from electronic annotation /// 0016021 // integral to membrane // inferred from electronic annotation	0016740 // transferase activity // inferred from electronic annotation /// 0016757 // transferase activity, transferring glycosyl groups // inferred from electronic annotation /// 0016758 // transferase activity, transferring hexosyl groups // inferred from electronic annotation	---
203032_s_at	FH	2.94427	1.19126	0.404604	2.28353	0	7.09841	7.55535	7.62227	8.91816	8.64199	1.19126	2.28353	0.0139278	AI363836	fumarate hydratase	FH	NM_000143	0006099 // tricarboxylic acid cycle // inferred from electronic annotation /// 0006106 // fumarate metabolic process // inferred from electronic annotation /// 0006106 // fumarate metabolic process // traceable author statement /// 0006108 // malate metabolic process // inferred from electronic annotation /// 0048873 // homeostasis of number of cells within a tissue // inferred from electronic an…	0005737 // cytoplasm // inferred from electronic annotation /// 0005737 // cytoplasm // traceable author statement /// 0005739 // mitochondrion // inferred from electronic annotation /// 0005739 // mitochondrion // traceable author statement /// 0005759 // mitochondrial matrix // not recorded /// 0045239 // tricarboxylic acid cycle enzyme complex // inferred from electronic annotation	0003824 // catalytic activity // inferred from electronic annotation /// 0004333 // fumarate hydratase activity // not recorded /// 0004333 // fumarate hydratase activity // inferred from electronic annotation /// 0004333 // fumarate hydratase activity // traceable author statement /// 0016829 // lyase activity // inferred from electronic annotation	Krebs-TCA_Cycle // GenMAPP
200862_at	DHCR24	3.82876	1.1906	0.310963	2.28248	0	1.35409	9.68567	9.7684	10.9428	10.8924	1.1906	2.28248	0.00165087	NM_014762	24-dehydrocholesterol reductase	DHCR24	NM_014762	0006694 // steroid biosynthetic process // inferred from electronic annotation /// 0006695 // cholesterol biosynthetic process // inferred from mutant phenotype /// 0006695 // cholesterol biosynthetic process // inferred from sequence or structural similarity /// 0006695 // cholesterol biosynthetic process // non-traceable author statement /// 0006695 // cholesterol biosynthetic process // inferr…	0000139 // Golgi membrane // inferred from electronic annotation /// 0005634 // nucleus // inferred from direct assay /// 0005783 // endoplasmic reticulum // inferred from direct assay /// 0005783 // endoplasmic reticulum // inferred from electronic annotation /// 0005789 // endoplasmic reticulum membrane // not recorded /// 0005789 // endoplasmic reticulum membrane // non-traceable author statem…	0003824 // catalytic activity // inferred from electronic annotation /// 0016491 // oxidoreductase activity // inferred from electronic annotation /// 0016628 // oxidoreductase activity, acting on the CH-CH group of donors, NAD or NADP as acceptor // inferred from direct assay /// 0019899 // enzyme binding // inferred from physical interaction /// 0042605 // peptide antigen binding // inferred fr…	---
203184_at	FBN2	3.17068	1.18986	0.375271	2.28131	0	5.24911	8.68626	8.80239	10.0308	9.83755	1.18986	2.28131	0.00885902	NM_001999	fibrillin 2	FBN2	NM_001999	0009653 // anatomical structure morphogenesis // traceable author statement /// 0030326 // embryonic limb morphogenesis // inferred from electronic annotation /// 0030501 // positive regulation of bone mineralization // inferred from sequence or structural similarity /// 0035108 // limb morphogenesis // inferred from electronic annotation /// 0035583 // negative regulation of transforming growth …	0001527 // microfibril // traceable author statement /// 0005576 // extracellular region // inferred from electronic annotation /// 0005578 // proteinaceous extracellular matrix // inferred from electronic annotation /// 0005578 // proteinaceous extracellular matrix // traceable author statement	0005201 // extracellular matrix structural constituent // inferred from electronic annotation /// 0005201 // extracellular matrix structural constituent // traceable author statement /// 0005488 // binding // inferred from electronic annotation /// 0005509 // calcium ion binding // inferred from electronic annotation	---
218995_s_at	EDN1	2.16559	1.18602	0.547667	2.27525	0.0523603	15.5336	7.63285	8.11082	9.2134	8.90232	1.18602	2.27525	0.0532273	NM_001955	endothelin 1	EDN1	NM_001168319 /// NM_001955	0001501 // skeletal system development // inferred from electronic annotation /// 0001516 // prostaglandin biosynthetic process // inferred from direct assay /// 0001569 // patterning of blood vessels // inferred from electronic annotation /// 0001666 // response to hypoxia // inferred from electronic annotation /// 0001701 // in utero embryonic development // inferred from electronic annotation …	0005576 // extracellular region // not recorded /// 0005576 // extracellular region // inferred from electronic annotation /// 0005615 // extracellular space // inferred from direct assay /// 0005615 // extracellular space // inferred from electronic annotation /// 0005737 // cytoplasm // inferred from direct assay	0005102 // receptor binding // inferred from electronic annotation /// 0005179 // hormone activity // inferred from direct assay /// 0005515 // protein binding // inferred from electronic annotation /// 0031707 // endothelin A receptor binding // inferred from direct assay /// 0031707 // endothelin A receptor binding // inferred from electronic annotation /// 0031708 // endothelin B receptor bind…	Prostaglandin_synthesis_regulation // GenMAPP
232263_at	SLC6A15	4.04315	1.18301	0.292595	2.27049	0	0.506703	7.96553	7.93036	9.15534	9.10656	1.18301	2.27049	0.00064537	AK022853	solute carrier family 6 (neutral amino acid transporter), member 15	SLC6A15	NM_001146335 /// NM_018057 /// NM_182767	0006810 // transport // inferred from electronic annotation /// 0006836 // neurotransmitter transport // non-traceable author statement /// 0006836 // neurotransmitter transport // inferred from electronic annotation /// 0006865 // amino acid transport // not recorded	0005886 // plasma membrane // not recorded /// 0005887 // integral to plasma membrane // inferred from electronic annotation /// 0016020 // membrane // inferred from electronic annotation /// 0016021 // integral to membrane // non-traceable author statement /// 0016021 // integral to membrane // inferred from electronic annotation	0005326 // neurotransmitter transporter activity // non-traceable author statement /// 0005328 // neurotransmitter:sodium symporter activity // inferred from electronic annotation /// 0015171 // amino acid transmembrane transporter activity // not recorded /// 0015293 // symporter activity // inferred from electronic annotation	---
228653_at	SAMD5	3.54827	1.18195	0.333104	2.26882	0	2.76056	6.44865	6.30769	7.56383	7.55641	1.18194	2.26882	0.00354663	AI700341	sterile alpha motif domain containing 5	SAMD5	NM_001030060	---	---	---	---
203714_s_at	TBCE	3.80065	1.18191	0.310975	2.26877	0	1.4793	8.04036	8.1346	9.25813	9.28066	1.18191	2.26877	0.00167604	NM_003193	tubulin folding cofactor E	TBCE	NM_001079515 /// NM_003193	0000226 // microtubule cytoskeleton organization // inferred from electronic annotation /// 0006412 // translation // inferred from electronic annotation /// 0006457 // protein folding // traceable author statement /// 0007409 // axonogenesis // inferred from electronic annotation /// 0008344 // adult locomotory behavior // inferred from electronic annotation /// 0009791 // post-embryonic develop…	0005622 // intracellular // inferred from electronic annotation /// 0005737 // cytoplasm // inferred from electronic annotation /// 0005840 // ribosome // inferred from electronic annotation /// 0005856 // cytoskeleton // inferred from electronic annotation /// 0005874 // microtubule // traceable author statement	0003735 // structural constituent of ribosome // inferred from electronic annotation /// 0051087 // chaperone binding // traceable author statement	---
202483_s_at	RANBP1	3.18868	1.18049	0.370213	2.26654	0	5.11389	10.4769	10.6354	11.6637	11.8095	1.18049	2.26654	0.00821884	NM_002882	RAN binding protein 1	RANBP1	NM_002882	0007051 // spindle organization // inferred from electronic annotation /// 0007165 // signal transduction // traceable author statement /// 0046604 // positive regulation of mitotic centrosome separation // inferred from electronic annotation /// 0046907 // intracellular transport // inferred from electronic annotation	0005634 // nucleus // traceable author statement /// 0005737 // cytoplasm // traceable author statement /// 0005737 // cytoplasm // inferred from electronic annotation /// 0005813 // centrosome // inferred from electronic annotation	0005092 // GDP-dissociation inhibitor activity // traceable author statement /// 0005096 // GTPase activator activity // inferred from electronic annotation /// 0005515 // protein binding // inferred from physical interaction /// 0008536 // Ran GTPase binding // traceable author statement	---
205681_at	BCL2A1	3.0899	1.17723	0.380993	2.26142	0	5.87719	8.62534	8.45309	9.79779	9.6351	1.17723	2.26142	0.00997524	NM_004049	BCL2-related protein A1	BCL2A1	NM_001114735 /// NM_004049	0006915 // apoptosis // inferred from electronic annotation /// 0006916 // anti-apoptosis // traceable author statement /// 0042981 // regulation of apoptosis // inferred from electronic annotation	0005737 // cytoplasm // inferred from electronic annotation	0005515 // protein binding // inferred from physical interaction	Apoptosis_KEGG // GenMAPP
211714_x_at	TUBB	2.69206	1.17551	0.436656	2.25872	0	9.48459	12.1609	12.4548	13.39	13.5767	1.1755	2.25872	0.0212459	BC005838	tubulin, beta	TUBB	NM_178014	0006928 // cellular component movement // traceable author statement /// 0007017 // microtubule-based process // inferred from electronic annotation /// 0007018 // microtubule-based movement // inferred from electronic annotation /// 0007067 // mitosis // inferred from electronic annotation /// 0030182 // neuron differentiation // inferred from electronic annotation /// 0042267 // natural killer …	0005829 // cytosol // not recorded /// 0005856 // cytoskeleton // traceable author statement /// 0005874 // microtubule // inferred from electronic annotation /// 0043234 // protein complex // inferred from electronic annotation	0000166 // nucleotide binding // inferred from electronic annotation /// 0003924 // GTPase activity // inferred from electronic annotation /// 0005198 // structural molecule activity // inferred from electronic annotation /// 0005200 // structural constituent of cytoskeleton // inferred from electronic annotation /// 0005525 // GTP binding // inferred from electronic annotation /// 0042277 // pep…	---
1555938_x_at	VIM	2.24316	1.17498	0.523807	2.2579	0.0523603	14.5577	6.47631	6.48545	7.91711	7.39463	1.17498	2.2579	0.0460585	AI520969	vimentin	VIM	NM_003380	0006928 // cellular component movement // traceable author statement /// 0044419 // interspecies interaction between organisms // inferred from electronic annotation /// 0045103 // intermediate filament-based process // inferred from electronic annotation	0005737 // cytoplasm // inferred from direct assay /// 0005829 // cytosol // not recorded /// 0005829 // cytosol // inferred from direct assay /// 0005856 // cytoskeleton // inferred from direct assay /// 0005856 // cytoskeleton // traceable author statement /// 0005882 // intermediate filament // inferred from direct assay /// 0005886 // plasma membrane // inferred from direct assay /// 0030424 …	0005200 // structural constituent of cytoskeleton // inferred from direct assay /// 0005515 // protein binding // inferred from physical interaction /// 0008022 // protein C-terminus binding // inferred from physical interaction /// 0019901 // protein kinase binding // inferred from electronic annotation	---	VIM	vimentin
208778_s_at	TCP1	4.18836	1.17148	0.279699	2.25243	0	0.0340139	11.1412	11.154	12.335	12.3032	1.17148	2.25243	0.000214781	BC000665	t-complex 1	TCP1	NM_001008897 /// NM_030752	0006457 // protein folding // inferred from electronic annotation /// 0006457 // protein folding // traceable author statement /// 0007021 // tubulin complex assembly // non-traceable author statement /// 0044267 // cellular protein metabolic process // inferred from electronic annotation	0000242 // pericentriolar material // inferred from electronic annotation /// 0005720 // nuclear heterochromatin // inferred from electronic annotation /// 0005737 // cytoplasm // inferred from electronic annotation /// 0005815 // microtubule organizing center // inferred from electronic annotation /// 0005829 // cytosol // not recorded /// 0005829 // cytosol // traceable author statement /// 000…	0000166 // nucleotide binding // inferred from electronic annotation /// 0005515 // protein binding // inferred from electronic annotation /// 0005524 // ATP binding // inferred from electronic annotation /// 0051082 // unfolded protein binding // inferred from electronic annotation /// 0051082 // unfolded protein binding // traceable author statement	---
201112_s_at	CSE1L	3.668	1.16789	0.318399	2.24683	0	2.11678	11.2301	11.1672	12.4127	12.3203	1.16789	2.24683	0.00228083	NM_001316	CSE1 chromosome segregation 1-like (yeast)	CSE1L	NM_001316	0006810 // transport // inferred from electronic annotation /// 0006886 // intracellular protein transport // inferred from electronic annotation /// 0006915 // apoptosis // traceable author statement /// 0008283 // cell proliferation // inferred from electronic annotation /// 0008283 // cell proliferation // traceable author statement /// 0015031 // protein transport // inferred from electronic …	0005634 // nucleus // inferred from electronic annotation /// 0005634 // nucleus // traceable author statement /// 0005737 // cytoplasm // inferred from electronic annotation /// 0005737 // cytoplasm // traceable author statement	0005488 // binding // inferred from electronic annotation /// 0005515 // protein binding // inferred from physical interaction /// 0008262 // importin-alpha export receptor activity // inferred from electronic annotation /// 0008262 // importin-alpha export receptor activity // traceable author statement /// 0008565 // protein transporter activity // inferred from electronic annotation	---
213256_at	MARCH_3	2.91696	1.16732	0.400185	2.24595	0	7.34025	7.28173	7.02203	8.2735	8.36491	1.16732	2.24595	0.013623	AW593996	membrane-associated ring finger (C3HC4) 3	2011-03-03	NM_178450	0006897 // endocytosis // inferred from electronic annotation	0005768 // endosome // inferred from electronic annotation /// 0016020 // membrane // inferred from electronic annotation /// 0016021 // integral to membrane // inferred from electronic annotation /// 0030659 // cytoplasmic vesicle membrane // inferred from electronic annotation /// 0031410 // cytoplasmic vesicle // inferred from electronic annotation /// 0031901 // early endosome membrane // inf…	0008270 // zinc ion binding // inferred from electronic annotation /// 0016874 // ligase activity // inferred from electronic annotation /// 0046872 // metal ion binding // inferred from electronic annotation	---
204026_s_at	ZWINT	2.96554	1.16576	0.393101	2.24351	0	6.91286	10.2737	10.3696	11.6088	11.3659	1.16575	2.24351	0.0123144	NM_007057	ZW10 interactor	ZWINT	NM_001005413 /// NM_007057 /// NM_032997	0000070 // mitotic sister chromatid segregation // inferred from direct assay /// 0007049 // cell cycle // non-traceable author statement /// 0007049 // cell cycle // inferred from electronic annotation /// 0007051 // spindle organization // non-traceable author statement /// 0007067 // mitosis // inferred from electronic annotation /// 0007093 // mitotic cell cycle checkpoint // inferred from di…	0000775 // chromosome, centromeric region // inferred from electronic annotation /// 0000776 // kinetochore // inferred from direct assay /// 0000776 // kinetochore // inferred from electronic annotation /// 0000777 // condensed chromosome kinetochore // inferred from electronic annotation /// 0005634 // nucleus // inferred from electronic annotation /// 0005737 // cytoplasm // inferred from dire…	0005515 // protein binding // inferred from physical interaction /// 0047485 // protein N-terminus binding // inferred from physical interaction	---
205167_s_at	CDC25C	3.50358	1.16384	0.332186	2.24053	0	3.01808	7.61774	7.64171	8.86219	8.72495	1.16384	2.24053	0.00356315	NM_001790	cell division cycle 25 homolog C (S. pombe)	CDC25C	NM_001790 /// NM_022809	0000079 // regulation of cyclin-dependent protein kinase activity // traceable author statement /// 0000087 // M phase of mitotic cell cycle // non-traceable author statement /// 0000087 // M phase of mitotic cell cycle // inferred from electronic annotation /// 0006260 // DNA replication // not recorded /// 0006470 // protein dephosphorylation // inferred from electronic annotation /// 0007049 /…	0005622 // intracellular // inferred from electronic annotation /// 0005634 // nucleus // inferred from electronic annotation /// 0005654 // nucleoplasm // not recorded /// 0005737 // cytoplasm // inferred from electronic annotation /// 0005829 // cytosol // not recorded	0004721 // phosphoprotein phosphatase activity // not recorded /// 0004721 // phosphoprotein phosphatase activity // inferred from electronic annotation /// 0004725 // protein tyrosine phosphatase activity // non-traceable author statement /// 0004725 // protein tyrosine phosphatase activity // inferred from electronic annotation /// 0005515 // protein binding // inferred from physical interactio…	Cell_cycle_KEGG // GenMAPP
202502_at	ACADM	2.0904	1.16305	0.556378	2.2393	0.0904263	16.5032	9.11884	9.00375	10.5125	9.93619	1.16305	2.2393	0.0583072	NM_000016	acyl-CoA dehydrogenase, C-4 to C-12 straight chain	ACADM	NM_000016 /// NM_001127328	0001889 // liver development // inferred from electronic annotation /// 0005978 // glycogen biosynthetic process // inferred from electronic annotation /// 0006082 // organic acid metabolic process // inferred from electronic annotation /// 0006111 // regulation of gluconeogenesis // inferred from electronic annotation /// 0006629 // lipid metabolic process // inferred from electronic annotation …	0005739 // mitochondrion // inferred from direct assay /// 0005739 // mitochondrion // inferred from electronic annotation /// 0005739 // mitochondrion // traceable author statement /// 0005759 // mitochondrial matrix // inferred from electronic annotation /// 0031966 // mitochondrial membrane // inferred from electronic annotation	0003995 // acyl-CoA dehydrogenase activity // inferred from direct assay /// 0003995 // acyl-CoA dehydrogenase activity // inferred from mutant phenotype /// 0003995 // acyl-CoA dehydrogenase activity // inferred from electronic annotation /// 0016491 // oxidoreductase activity // inferred from electronic annotation /// 0016627 // oxidoreductase activity, acting on the CH-CH group of donors // in…	Fatty_Acid_Degradation // GenMAPP /// Mitochondrial_fatty_acid_betaoxidation // GenMAPP
221158_at	GCFC1	1.73626	1.158	0.666951	2.23148	0.143798	21.3188	7.18382	7.20858	8.75844	7.94997	1.158	2.23148	0.103397	NM_013329	GC-rich sequence DNA-binding factor 1	GCFC1	NM_013329 /// NM_016631 /// NR_027873	0006350 // transcription // inferred from electronic annotation /// 0006355 // regulation of transcription, DNA-dependent // non-traceable author statement /// 0045449 // regulation of transcription // inferred from electronic annotation	0005634 // nucleus // inferred from electronic annotation /// 0005829 // cytosol // inferred from direct assay	0003677 // DNA binding // non-traceable author statement /// 0003677 // DNA binding // inferred from electronic annotation /// 0003700 // sequence-specific DNA binding transcription factor activity // inferred from electronic annotation	---
236917_at	LRRC34	2.11233	1.15747	0.547961	2.23066	0.0904263	16.2182	6.23144	5.81575	7.3767	6.98543	1.15747	2.23066	0.0557731	AW975772	leucine rich repeat containing 34	LRRC34	NM_001172779 /// NM_001172780 /// NM_153353	---	---	0005515 // protein binding // inferred from electronic annotation	---
235463_s_at	LASS6	3.00018	1.15536	0.385096	2.2274	0	6.61593	6.4175	6.4868	7.72508	7.48994	1.15536	2.2274	0.011068	AI081356	LAG1 homolog, ceramide synthase 6	LASS6	NM_203463	0006355 // regulation of transcription, DNA-dependent // inferred from electronic annotation /// 0008610 // lipid biosynthetic process // inferred from electronic annotation /// 0030148 // sphingolipid biosynthetic process // inferred from electronic annotation /// 0045449 // regulation of transcription // inferred from electronic annotation /// 0046513 // ceramide biosynthetic process // inferre…	0005634 // nucleus // inferred from electronic annotation /// 0005783 // endoplasmic reticulum // inferred from electronic annotation /// 0005789 // endoplasmic reticulum membrane // inferred from electronic annotation /// 0016020 // membrane // inferred from electronic annotation /// 0016021 // integral to membrane // inferred from electronic annotation /// 0031965 // nuclear membrane // inferre…	0003677 // DNA binding // inferred from electronic annotation /// 0003700 // sequence-specific DNA binding transcription factor activity // inferred from electronic annotation /// 0043565 // sequence-specific DNA binding // inferred from electronic annotation /// 0050291 // sphingosine N-acyltransferase activity // inferred from electronic annotation	---
227801_at	TRIM59	2.62879	1.15492	0.439336	2.22672	0	10.1365	7.64727	7.32064	8.70661	8.57114	1.15492	2.22672	0.0226439	N90779	tripartite motif-containing 59	TRIM59	NM_173084	---	0005622 // intracellular // inferred from electronic annotation /// 0016020 // membrane // inferred from electronic annotation /// 0016021 // integral to membrane // inferred from electronic annotation	0005515 // protein binding // inferred from electronic annotation /// 0008270 // zinc ion binding // inferred from electronic annotation /// 0046872 // metal ion binding // inferred from electronic annotation	---
242600_at	FRMD3	2.59434	1.15363	0.444672	2.22473	0	10.5002	5.92101	5.68455	7.09497	6.81785	1.15363	2.22473	0.0240336	AA746863	FERM domain containing 3	FRMD3	NM_174938	---	0005737 // cytoplasm // inferred from electronic annotation /// 0005856 // cytoskeleton // inferred from electronic annotation /// 0016020 // membrane // inferred from electronic annotation /// 0016021 // integral to membrane // inferred from electronic annotation /// 0019898 // extrinsic to membrane // inferred from electronic annotation	0005488 // binding // inferred from electronic annotation /// 0008092 // cytoskeletal protein binding // inferred from electronic annotation	---
215017_s_at	FNBP1L	2.2376	1.15346	0.515493	2.22448	0.0523603	14.6268	7.62187	7.6287	9.03169	8.52581	1.15346	2.22448	0.0448832	AW270932	formin binding protein 1-like	FNBP1L	NM_001024948 /// NM_001164473 /// NM_017737	0006897 // endocytosis // inferred from electronic annotation	0005737 // cytoplasm // inferred from electronic annotation /// 0005856 // cytoskeleton // inferred from electronic annotation /// 0005886 // plasma membrane // inferred from electronic annotation /// 0005938 // cell cortex // inferred from electronic annotation /// 0016020 // membrane // inferred from electronic annotation /// 0016023 // cytoplasmic membrane-bounded vesicle // inferred from elec…	0008289 // lipid binding // inferred from electronic annotation	---
228307_at	EMILIN3	2.26943	1.15145	0.507372	2.22136	0.0523603	14.2331	6.8056	6.82416	8.21099	7.72165	1.15145	2.22136	0.0423636	AL137580	elastin microfibril interfacer 3	EMILIN3	NM_052846	---	0005576 // extracellular region // inferred from electronic annotation /// 0005578 // proteinaceous extracellular matrix // inferred from electronic annotation /// 0005737 // cytoplasm // inferred from electronic annotation	---	---
202725_at	POLR2A	3.23573	1.1465	0.354325	2.21376	0	4.76846	8.07821	8.25971	9.32928	9.30163	1.1465	2.21376	0.00634979	NM_000937	polymerase (RNA) II (DNA directed) polypeptide A, 220kDa	POLR2A	NM_000937	0006350 // transcription // inferred from electronic annotation /// 0006351 // transcription, DNA-dependent // non-traceable author statement /// 0006355 // regulation of transcription, DNA-dependent // non-traceable author statement /// 0006366 // transcription from RNA polymerase II promoter // inferred from direct assay /// 0006366 // transcription from RNA polymerase II promoter // non-tracea…	0005634 // nucleus // inferred from direct assay /// 0005634 // nucleus // non-traceable author statement /// 0005634 // nucleus // inferred from electronic annotation /// 0005654 // nucleoplasm // not recorded /// 0005665 // DNA-directed RNA polymerase II, core complex // inferred from direct assay /// 0005665 // DNA-directed RNA polymerase II, core complex // inferred from electronic annotation…	0003677 // DNA binding // non-traceable author statement /// 0003677 // DNA binding // inferred from electronic annotation /// 0003677 // DNA binding // traceable author statement /// 0003899 // DNA-directed RNA polymerase activity // non-traceable author statement /// 0003899 // DNA-directed RNA polymerase activity // inferred from electronic annotation /// 0003899 // DNA-directed RNA polymerase…	mRNA_processing_Reactome // GenMAPP /// RNA_transcription_Reactome // GenMAPP
202718_at	IGFBP2	2.2629	1.14555	0.50623	2.2123	0.0523603	14.3134	7.88674	7.4014	8.76721	8.81204	1.14555	2.2123	0.0424	NM_000597	insulin-like growth factor binding protein 2, 36kDa	IGFBP2	NM_000597	0001558 // regulation of cell growth // inferred from electronic annotation /// 0006950 // response to stress // inferred from electronic annotation /// 0007165 // signal transduction // inferred from electronic annotation /// 0007565 // female pregnancy // inferred from electronic annotation /// 0007568 // aging // inferred from electronic annotation /// 0007584 // response to nutrient // inferr…	0005576 // extracellular region // inferred from sequence or structural similarity /// 0005576 // extracellular region // inferred from electronic annotation /// 0005615 // extracellular space // inferred from electronic annotation /// 0016324 // apical plasma membrane // inferred from electronic annotation /// 0031410 // cytoplasmic vesicle // inferred from electronic annotation	0005515 // protein binding // inferred from physical interaction /// 0005520 // insulin-like growth factor binding // inferred from electronic annotation /// 0019838 // growth factor binding // inferred from electronic annotation /// 0031994 // insulin-like growth factor I binding // inferred from direct assay /// 0031994 // insulin-like growth factor I binding // inferred from electronic annotat…	Smooth_muscle_contraction // GenMAPP
227212_s_at	PHF19	2.88522	1.14342	0.396301	2.20904	0	7.62638	9.00522	9.24346	10.3286	10.2069	1.14342	2.20904	0.0134129	BE544837	PHD finger protein 19	PHF19	NM_001009936 /// NM_015651	0006350 // transcription // inferred from electronic annotation /// 0045449 // regulation of transcription // inferred from electronic annotation	0005634 // nucleus // inferred from electronic annotation	0003676 // nucleic acid binding // inferred from electronic annotation /// 0005515 // protein binding // inferred from electronic annotation /// 0008270 // zinc ion binding // inferred from electronic annotation /// 0046872 // metal ion binding // inferred from electronic annotation	---
219544_at	C13orf34	2.61859	1.14306	0.436518	2.20849	0	10.2435	7.90885	8.2274	9.28121	9.14116	1.14306	2.20849	0.0223939	NM_024808	chromosome 13 open reading frame 34	C13orf34	NM_024808	0007049 // cell cycle // inferred from electronic annotation /// 0007067 // mitosis // inferred from electronic annotation /// 0007088 // regulation of mitosis // inferred from mutant phenotype /// 0032880 // regulation of protein localization // inferred from mutant phenotype /// 0051301 // cell division // inferred from electronic annotation /// 0060236 // regulation of mitotic spindle organiza…	---	0005515 // protein binding // inferred from physical interaction /// 0019901 // protein kinase binding // inferred from physical interaction	---
217755_at	HN1	3.28399	1.14139	0.34756	2.20593	0	4.42608	10.6897	10.6365	11.7238	11.8853	1.14138	2.20593	0.00550439	NM_016185	hematological and neurological expressed 1	HN1	NM_001002032 /// NM_001002033 /// NM_016185	---	0005634 // nucleus // inferred from electronic annotation	---	---
203065_s_at	CAV1	2.99015	1.14122	0.381659	2.20567	0	6.70125	10.7695	10.8644	11.8489	12.0674	1.14121	2.20567	0.0107222	NM_001753	caveolin 1, caveolae protein, 22kDa	CAV1	NM_001172895 /// NM_001172896 /// NM_001172897 /// NM_001753	0000165 // MAPKKK cascade // inferred from electronic annotation /// 0000188 // inactivation of MAPK activity // inferred from sequence or structural similarity /// 0000188 // inactivation of MAPK activity // inferred from electronic annotation /// 0001570 // vasculogenesis // inferred from sequence or structural similarity /// 0001570 // vasculogenesis // inferred from electronic annotation /// …	0000139 // Golgi membrane // not recorded /// 0000139 // Golgi membrane // inferred from direct assay /// 0000139 // Golgi membrane // inferred from electronic annotation /// 0000299 // integral to membrane of membrane fraction // inferred from electronic annotation /// 0005622 // intracellular // inferred from direct assay /// 0005624 // membrane fraction // inferred from electronic annotation /…	0000149 // SNARE binding // inferred from electronic annotation /// 0005102 // receptor binding // inferred from physical interaction /// 0005198 // structural molecule activity // inferred from direct assay /// 0005515 // protein binding // inferred from physical interaction /// 0005515 // protein binding // inferred from electronic annotation /// 0008022 // protein C-terminus binding // inferre…	Integrin-mediated_cell_adhesion_KEGG // GenMAPP
38037_at	HBEGF	2.83075	1.1407	0.402967	2.20488	0	8.13018	8.46802	8.60118	9.79895	9.55164	1.1407	2.20488	0.0148216	M60278	heparin-binding EGF-like growth factor	HBEGF	NM_001945	0007165 // signal transduction // traceable author statement /// 0007173 // epidermal growth factor receptor signaling pathway // inferred from mutant phenotype /// 0007173 // epidermal growth factor receptor signaling pathway // inferred from electronic annotation /// 0007517 // muscle organ development // traceable author statement /// 0008016 // regulation of heart contraction // inferred from…	0005576 // extracellular region // inferred from electronic annotation /// 0005615 // extracellular space // inferred from direct assay /// 0005615 // extracellular space // inferred from sequence or structural similarity /// 0005615 // extracellular space // traceable author statement /// 0005615 // extracellular space // inferred from electronic annotation /// 0005886 // plasma membrane // infe…	0004872 // receptor activity // inferred from electronic annotation /// 0005154 // epidermal growth factor receptor binding // inferred from electronic annotation /// 0005154 // epidermal growth factor receptor binding // traceable author statement /// 0008083 // growth factor activity // inferred from electronic annotation /// 0008201 // heparin binding // inferred from mutant phenotype /// 0008…	Hypertrophy_model // GenMAPP
204244_s_at	DBF4	2.34471	1.14021	0.486293	2.20414	0.0523603	13.3208	7.44502	7.11791	8.5744	8.26897	1.14021	2.20414	0.0364224	NM_006716	DBF4 homolog (S. cerevisiae)	DBF4	NM_006716	0000082 // G1/S transition of mitotic cell cycle // traceable author statement /// 0006260 // DNA replication // not recorded /// 0006260 // DNA replication // inferred from electronic annotation /// 0006260 // DNA replication // traceable author statement /// 0007049 // cell cycle // inferred from electronic annotation	0005622 // intracellular // inferred from electronic annotation /// 0005634 // nucleus // inferred from electronic annotation /// 0005654 // nucleoplasm // not recorded	0003676 // nucleic acid binding // inferred from electronic annotation /// 0005515 // protein binding // inferred from physical interaction /// 0008047 // enzyme activator activity // traceable author statement /// 0008270 // zinc ion binding // inferred from electronic annotation /// 0046872 // metal ion binding // inferred from electronic annotation	Cell_cycle_KEGG // GenMAPP /// DNA_replication_Reactome // GenMAPP
203211_s_at	MTMR2	3.44818	1.13954	0.330477	2.20311	0	3.35075	9.07837	9.11198	10.3006	10.1689	1.13954	2.20311	0.00353676	AK027038	myotubularin related protein 2	MTMR2	NM_016156 /// NM_201278 /// NM_201281 /// NR_023356	0006470 // protein dephosphorylation // non-traceable author statement /// 0016311 // dephosphorylation // inferred from electronic annotation /// 0051262 // protein tetramerization // inferred from electronic annotation	0005634 // nucleus // inferred from direct assay /// 0005737 // cytoplasm // inferred from direct assay /// 0005737 // cytoplasm // inferred from electronic annotation /// 0005774 // vacuolar membrane // inferred from electronic annotation /// 0016020 // membrane // inferred from electronic annotation	0004437 // inositol or phosphatidylinositol phosphatase activity // traceable author statement /// 0004437 // inositol or phosphatidylinositol phosphatase activity // inferred from electronic annotation /// 0004725 // protein tyrosine phosphatase activity // inferred from electronic annotation /// 0005515 // protein binding // inferred from physical interaction /// 0008138 // protein tyrosine/ser…	---
206632_s_at	APOBEC3B	2.77613	1.13779	0.409847	2.20043	0	8.65133	8.30537	8.35394	9.61275	9.32214	1.13779	2.20043	0.0163546	NM_004900	apolipoprotein B mRNA editing enzyme, catalytic polypeptide-like 3B	APOBEC3B	NM_004900	---	---	0003723 // RNA binding // inferred from electronic annotation /// 0003824 // catalytic activity // inferred from electronic annotation /// 0008270 // zinc ion binding // inferred from electronic annotation /// 0016787 // hydrolase activity // inferred from electronic annotation /// 0016814 // hydrolase activity, acting on carbon-nitrogen (but not peptide) bonds, in cyclic amidines // inferred fro…	---
209273_s_at	ISCA1	2.58525	1.13711	0.439846	2.19941	0	10.5972	8.45855	8.56229	9.81709	9.47797	1.13711	2.19941	0.0234641	BG387555	iron-sulfur cluster assembly 1 homolog (S. cerevisiae)	ISCA1	NM_030940	0016226 // iron-sulfur cluster assembly // inferred from electronic annotation	0005739 // mitochondrion // inferred from electronic annotation	0005198 // structural molecule activity // inferred from electronic annotation /// 0046872 // metal ion binding // inferred from electronic annotation /// 0051536 // iron-sulfur cluster binding // inferred from electronic annotation	---
205063_at	SIP1	1.95982	1.13701	0.580158	2.19924	0.117993	18.2356	6.94877	7.04059	8.44598	7.8174	1.13701	2.19924	0.0699505	NM_003616	survival of motor neuron protein interacting protein 1	SIP1	NM_001009182 /// NM_001009183 /// NM_003616	0000245 // spliceosome assembly // inferred from electronic annotation /// 0000245 // spliceosome assembly // traceable author statement /// 0000375 // RNA splicing, via transesterification reactions // traceable author statement /// 0000387 // spliceosomal snRNP assembly // not recorded /// 0000398 // nuclear mRNA splicing, via spliceosome // inferred from electronic annotation /// 0006397 // mR…	0005622 // intracellular // inferred from electronic annotation /// 0005634 // nucleus // inferred from electronic annotation /// 0005634 // nucleus // traceable author statement /// 0005654 // nucleoplasm // not recorded /// 0005681 // spliceosomal complex // inferred from electronic annotation /// 0005681 // spliceosomal complex // traceable author statement /// 0005737 // cytoplasm // inferred…	0005515 // protein binding // inferred from physical interaction	---
212060_at	SR140	2.44066	1.13507	0.465065	2.19629	0.0523603	12.1985	8.94942	8.74295	10.1555	9.807	1.13507	2.19629	0.0303955	AU152088	U2-associated SR140 protein	SR140	NM_001080415	0006396 // RNA processing // inferred from electronic annotation	---	0000166 // nucleotide binding // inferred from electronic annotation /// 0003676 // nucleic acid binding // inferred from electronic annotation /// 0003723 // RNA binding // inferred from electronic annotation	---
200041_s_at	ATP6V1G2 /// BAT1	2.76829	1.13453	0.409829	2.19546	0	8.72748	10.6188	10.8205	11.7468	11.9615	1.13453	2.19546	0.0164426	NM_004640	ATPase, H+ transporting, lysosomal 13kDa, V1 subunit G2 /// HLA-B associated transcript 1	ATP6V1G2 /// BAT1	NM_004640 /// NM_080598 /// NM_130463 /// NM_138282	0000245 // spliceosome assembly // inferred from direct assay /// 0000398 // nuclear mRNA splicing, via spliceosome // inferred from genetic interaction /// 0006397 // mRNA processing // inferred from electronic annotation /// 0006406 // mRNA export from nucleus // inferred from direct assay /// 0006406 // mRNA export from nucleus // inferred from genetic interaction /// 0006810 // transport // i…	0000346 // transcription export complex // inferred from direct assay /// 0005634 // nucleus // inferred from electronic annotation /// 0005634 // nucleus // traceable author statement /// 0005681 // spliceosomal complex // inferred from direct assay /// 0005681 // spliceosomal complex // inferred from electronic annotation /// 0005687 // U4 snRNP // inferred from direct assay /// 0005688 // U6 s…	0000166 // nucleotide binding // inferred from electronic annotation /// 0003676 // nucleic acid binding // inferred from electronic annotation /// 0003723 // RNA binding // inferred from electronic annotation /// 0004004 // ATP-dependent RNA helicase activity // inferred from direct assay /// 0004004 // ATP-dependent RNA helicase activity // traceable author statement /// 0004386 // helicase act…	---
222039_at	KIF18B	2.95022	1.13246	0.383856	2.19232	0	7.04627	8.68978	8.75868	9.97302	9.74035	1.13246	2.19232	0.0112845	AA292789	kinesin family member 18B	KIF18B	NM_001080443	0007018 // microtubule-based movement // inferred from electronic annotation	0005874 // microtubule // inferred from electronic annotation	0000166 // nucleotide binding // inferred from electronic annotation /// 0003774 // motor activity // inferred from electronic annotation /// 0003777 // microtubule motor activity // inferred from electronic annotation /// 0005524 // ATP binding // inferred from electronic annotation	---
225943_at	NLN	3.44529	1.13223	0.328632	2.19197	0	3.36851	7.7983	7.91502	8.95784	9.01994	1.13223	2.19197	0.00339139	BF222737	neurolysin (metallopeptidase M3 family)	NLN	NM_020726	0006508 // proteolysis // inferred from electronic annotation	0005737 // cytoplasm // inferred from electronic annotation /// 0005739 // mitochondrion // inferred from electronic annotation /// 0005758 // mitochondrial intermembrane space // inferred from electronic annotation	0004222 // metalloendopeptidase activity // inferred from electronic annotation /// 0008233 // peptidase activity // inferred from electronic annotation /// 0008237 // metallopeptidase activity // inferred from electronic annotation /// 0016787 // hydrolase activity // inferred from electronic annotation /// 0046872 // metal ion binding // inferred from electronic annotation	---
240349_at	PRKAA2	1.88652	1.13164	0.599855	2.19108	0.143798	19.2321	6.8393	6.17746	7.70544	7.5746	1.13164	2.19108	0.0785317	AV693202	protein kinase, AMP-activated, alpha 2 catalytic subunit	PRKAA2	NM_006252	0006468 // protein phosphorylation // inferred from electronic annotation /// 0006468 // protein phosphorylation // traceable author statement /// 0006633 // fatty acid biosynthetic process // inferred from electronic annotation /// 0006694 // steroid biosynthetic process // inferred from electronic annotation /// 0006695 // cholesterol biosynthetic process // inferred from electronic annotation …	0005634 // nucleus // inferred from electronic annotation /// 0005654 // nucleoplasm // not recorded /// 0005829 // cytosol // not recorded /// 0031588 // AMP-activated protein kinase complex // inferred from electronic annotation /// 0043234 // protein complex // inferred from electronic annotation	0000166 // nucleotide binding // inferred from electronic annotation /// 0004672 // protein kinase activity // traceable author statement /// 0004672 // protein kinase activity // inferred from electronic annotation /// 0004674 // protein serine/threonine kinase activity // inferred from electronic annotation /// 0004679 // AMP-activated protein kinase activity // inferred from electronic annotat…	Fatty_Acid_Synthesis // GenMAPP
201667_at	GJA1	2.92078	1.13153	0.387407	2.19091	0	7.30614	9.85906	9.87226	11.1219	10.8725	1.13153	2.19091	0.0119619	NM_000165	gap junction protein, alpha 1, 43kDa	GJA1	NM_000165	0001701 // in utero embryonic development // inferred from electronic annotation /// 0001764 // neuron migration // inferred from electronic annotation /// 0001947 // heart looping // inferred from electronic annotation /// 0002070 // epithelial cell maturation // inferred from electronic annotation /// 0006810 // transport // traceable author statement /// 0006915 // apoptosis // inferred from e…	0000139 // Golgi membrane // not recorded /// 0005737 // cytoplasm // inferred from electronic annotation /// 0005741 // mitochondrial outer membrane // inferred from electronic annotation /// 0005764 // lysosome // inferred from electronic annotation /// 0005769 // early endosome // inferred from electronic annotation /// 0005770 // late endosome // inferred from electronic annotation /// 000577…	0004871 // signal transducer activity // inferred from mutant phenotype /// 0005102 // receptor binding // inferred from electronic annotation /// 0005243 // gap junction channel activity // inferred from electronic annotation /// 0005515 // protein binding // inferred from physical interaction /// 0005515 // protein binding // inferred from electronic annotation /// 0015075 // ion transmembrane …	Calcium_regulation_in_cardiac_cells // GenMAPP /// Smooth_muscle_contraction // GenMAPP
219978_s_at	NUSAP1	2.6556	1.13091	0.425859	2.18997	0	9.85765	8.70773	8.44432	9.61035	9.80354	1.13091	2.18997	0.0202278	NM_018454	nucleolar and spindle associated protein 1	NUSAP1	NM_001129897 /// NM_016359 /// NM_018454	0000070 // mitotic sister chromatid segregation // inferred from direct assay /// 0000281 // cytokinesis after mitosis // inferred from direct assay /// 0007049 // cell cycle // inferred from electronic annotation /// 0007067 // mitosis // inferred from electronic annotation /// 0007076 // mitotic chromosome condensation // inferred from direct assay /// 0040001 // establishment of mitotic spindl…	0005634 // nucleus // inferred from electronic annotation /// 0005730 // nucleolus // inferred from electronic annotation /// 0005737 // cytoplasm // inferred from electronic annotation /// 0005819 // spindle // inferred from electronic annotation /// 0005856 // cytoskeleton // inferred from electronic annotation /// 0005874 // microtubule // inferred from electronic annotation /// 0005876 // spi…	0003677 // DNA binding // inferred from electronic annotation /// 0008017 // microtubule binding // inferred from electronic annotation	---
218728_s_at	CNIH4	3.56716	1.13011	0.316811	2.18876	0	2.65456	9.02492	9.10394	10.2318	10.1573	1.13011	2.18876	0.00229924	NM_014184	cornichon homolog 4 (Drosophila)	CNIH4	NM_014184	---	0005783 // endoplasmic reticulum // inferred from direct assay /// 0016020 // membrane // inferred from electronic annotation /// 0016021 // integral to membrane // inferred from electronic annotation	0005515 // protein binding // inferred from physical interaction	---
205046_at	CENPE	2.44827	1.12919	0.461218	2.18735	0.0523603	12.1116	5.91896	5.96247	7.26739	6.8724	1.12918	2.18735	0.0295941	NM_001813	centromere protein E, 312kDa	CENPE	NM_001813	0000089 // mitotic metaphase // traceable author statement /// 0007018 // microtubule-based movement // inferred from electronic annotation /// 0007049 // cell cycle // inferred from electronic annotation /// 0007067 // mitosis // inferred from electronic annotation /// 0007079 // mitotic chromosome movement towards spindle pole // traceable author statement /// 0007080 // mitotic metaphase plate…	0000775 // chromosome, centromeric region // inferred from direct assay /// 0000775 // chromosome, centromeric region // inferred from electronic annotation /// 0000776 // kinetochore // inferred from direct assay /// 0000776 // kinetochore // inferred from electronic annotation /// 0000777 // condensed chromosome kinetochore // inferred from electronic annotation /// 0000779 // condensed chromos…	0000166 // nucleotide binding // inferred from electronic annotation /// 0003774 // motor activity // inferred from electronic annotation /// 0003777 // microtubule motor activity // inferred from mutant phenotype /// 0003777 // microtubule motor activity // inferred from electronic annotation /// 0005515 // protein binding // inferred from physical interaction /// 0005524 // ATP binding // infer…	---
202444_s_at	ERLIN1	2.74823	1.12818	0.410511	2.18583	0	8.92373	8.45059	8.68872	9.78571	9.60995	1.12818	2.18583	0.016774	NM_006459	ER lipid raft associated 1	ERLIN1	NM_001100626 /// NM_006459	0030433 // ER-associated protein catabolic process // inferred from direct assay	0005783 // endoplasmic reticulum // inferred from direct assay /// 0005783 // endoplasmic reticulum // inferred from electronic annotation /// 0005789 // endoplasmic reticulum membrane // inferred from direct assay /// 0005789 // endoplasmic reticulum membrane // inferred from electronic annotation /// 0016020 // membrane // inferred from electronic annotation /// 0016021 // integral to membrane …	0005515 // protein binding // inferred from physical interaction	---
203139_at	DAPK1	2.10603	1.12704	0.535148	2.1841	0.0904263	16.2998	7.57943	7.61663	8.99705	8.45308	1.12704	2.1841	0.0538304	NM_004938	death-associated protein kinase 1	DAPK1	NM_004938	0006468 // protein phosphorylation // inferred from direct assay /// 0006468 // protein phosphorylation // inferred from electronic annotation /// 0006915 // apoptosis // inferred from electronic annotation /// 0006916 // anti-apoptosis // inferred from electronic annotation /// 0006917 // induction of apoptosis // inferred from mutant phenotype /// 0007165 // signal transduction // inferred from…	0005737 // cytoplasm // inferred from electronic annotation /// 0015629 // actin cytoskeleton // inferred from direct assay	0000166 // nucleotide binding // inferred from electronic annotation /// 0004672 // protein kinase activity // inferred from electronic annotation /// 0004674 // protein serine/threonine kinase activity // inferred from electronic annotation /// 0005515 // protein binding // inferred from physical interaction /// 0005515 // protein binding // inferred from electronic annotation /// 0005516 // cal…	---
202859_x_at	IL8	3.24264	1.12525	0.347018	2.1814	0	4.71867	9.99506	9.85214	11.0939	11.0038	1.12525	2.1814	0.00559058	NM_000584	interleukin 8	IL8	NM_000584	0001525 // angiogenesis // traceable author statement /// 0006928 // cellular component movement // traceable author statement /// 0006935 // chemotaxis // inferred from electronic annotation /// 0006954 // inflammatory response // traceable author statement /// 0006954 // inflammatory response // inferred from electronic annotation /// 0006955 // immune response // inferred from electronic annot…	0005576 // extracellular region // not recorded /// 0005576 // extracellular region // inferred from electronic annotation /// 0005615 // extracellular space // inferred from electronic annotation /// 0005615 // extracellular space // traceable author statement	0005125 // cytokine activity // inferred from electronic annotation /// 0005153 // interleukin-8 receptor binding // inferred from physical interaction /// 0005515 // protein binding // inferred from physical interaction /// 0008009 // chemokine activity // inferred from electronic annotation /// 0008009 // chemokine activity // traceable author statement	---
205895_s_at	NOLC1	2.52038	1.12507	0.446387	2.18112	0.0391894	11.3022	8.85129	9.21879	10.1664	10.1538	1.12507	2.18112	0.0256822	NM_004741	nucleolar and coiled-body phosphoprotein 1	NOLC1	NM_004741	0006364 // rRNA processing // traceable author statement /// 0006970 // response to osmotic stress // inferred from electronic annotation /// 0007000 // nucleolus organization // inferred from electronic annotation /// 0007049 // cell cycle // traceable author statement /// 0007067 // mitosis // traceable author statement /// 0008284 // positive regulation of cell proliferation // inferred from e…	0005634 // nucleus // inferred from electronic annotation /// 0005654 // nucleoplasm // inferred from electronic annotation /// 0005730 // nucleolus // inferred from electronic annotation /// 0005730 // nucleolus // traceable author statement /// 0005737 // cytoplasm // inferred from electronic annotation /// 0005737 // cytoplasm // traceable author statement /// 0015030 // Cajal body // inferred…	0000166 // nucleotide binding // inferred from electronic annotation /// 0003700 // sequence-specific DNA binding transcription factor activity // inferred from electronic annotation /// 0005515 // protein binding // inferred from physical interaction /// 0005515 // protein binding // inferred from electronic annotation /// 0005524 // ATP binding // inferred from electronic annotation /// 0005525…	---
235337_at	SERTAD4	2.25955	1.12372	0.497321	2.17908	0.0523603	14.3548	5.43153	5.89703	6.81892	6.75709	1.12372	2.17908	0.0409914	AI276403	SERTA domain containing 4	SERTAD4	NM_019605	---	---	0005515 // protein binding // inferred from physical interaction	---
223435_s_at	PCDHA1 /// PCDHA10 /// PCDHA11 /// PCDHA12 /// PCDHA13 /// PCDHA2 /// PCDHA3 /// PCDHA4 /// PCDHA5 /// PCDHA6 /// PCDHA7 /// PCDHA8 /// PCDHA9 /// PCDHAC1 /// PCDHAC2	3.71364	1.12278	0.302341	2.17767	0	1.88869	6.06127	6.09903	7.23798	7.16788	1.12278	2.17767	0.001255	AI268404	protocadherin alpha 1 /// protocadherin alpha 10 /// protocadherin alpha 11 /// protocadherin alpha 12 /// protocadherin alpha 13 /// protocadherin alpha 2 /// protocadherin alpha 3 /// protocadherin alpha 4 /// protocadherin alpha 5 /// protocadherin alpha 6 /// protocadherin alpha 7 /// protocadherin alpha 8 /// protocadherin alpha 9 /// protocadherin alpha subfamily C, 1 /// protocadherin alph…	PCDHA1 /// PCDHA10 /// PCDHA11 /// PCDHA12 /// PCDHA13 /// PCDHA2 /// PCDHA3 /// PCDHA4 /// PCDHA5 /// PCDHA6 /// PCDHA7 /// PCDHA8 /// PCDHA9 /// PCDHAC1 /// PCDHAC2	NM_014005 /// NM_018898 /// NM_018899 /// NM_018900 /// NM_018901 /// NM_018902 /// NM_018903 /// NM_018904 /// NM_018905 /// NM_018906 /// NM_018907 /// NM_018908 /// NM_018909 /// NM_018910 /// NM_018911 /// NM_031410 /// NM_031411 /// NM_031495 /// NM_031497 /// NM_031500 /// NM_031501 /// NM_031848 /// NM_031849 /// NM_031852 /// NM_031856 /// NM_031857 /// NM_031859 /// NM_031860 /// NM_0318…	0007155 // cell adhesion // inferred from electronic annotation /// 0007155 // cell adhesion // traceable author statement /// 0007156 // homophilic cell adhesion // inferred from electronic annotation /// 0007399 // nervous system development // traceable author statement	0005576 // extracellular region // inferred from electronic annotation /// 0005886 // plasma membrane // inferred from electronic annotation /// 0005887 // integral to plasma membrane // traceable author statement /// 0016020 // membrane // inferred from electronic annotation /// 0016021 // integral to membrane // inferred from electronic annotation	0005509 // calcium ion binding // inferred from electronic annotation /// 0005515 // protein binding // inferred from physical interaction	---
228195_at	C2orf88	2.81159	1.12271	0.399314	2.17755	0	8.31122	4.65821	4.93178	5.9177	5.9177	1.12271	2.17755	0.0145216	BE645119	chromosome 2 open reading frame 88	C2orf88	NM_001042519 /// NM_001042520 /// NM_001042521 /// NM_032321	---	0005576 // extracellular region // inferred from electronic annotation	---	---
203744_at	HMGB3	3.03826	1.12182	0.369232	2.17622	0	6.29705	8.33277	8.45547	9.60324	9.42864	1.12182	2.17622	0.00892629	NM_005342	high-mobility group box 3	HMGB3	NM_005342	0006310 // DNA recombination // inferred from sequence or structural similarity /// 0007275 // multicellular organismal development // traceable author statement	0005634 // nucleus // inferred from electronic annotation	0003677 // DNA binding // inferred from electronic annotation /// 0003690 // double-stranded DNA binding // inferred from sequence or structural similarity /// 0008301 // DNA bending activity // inferred from sequence or structural similarity /// 0008301 // DNA bending activity // traceable author statement	---
208941_s_at	SEPHS1	2.86614	1.12173	0.391373	2.17608	0	7.80108	8.59513	8.81143	9.89504	9.75498	1.12173	2.17608	0.0129381	BC000941	selenophosphate synthetase 1	SEPHS1	NM_001195602 /// NM_001195604 /// NM_012247	0006464 // protein modification process // traceable author statement	---	0000166 // nucleotide binding // inferred from electronic annotation /// 0003824 // catalytic activity // inferred from electronic annotation /// 0004756 // selenide, water dikinase activity // inferred from electronic annotation /// 0005524 // ATP binding // inferred from electronic annotation /// 0005524 // ATP binding // traceable author statement /// 0005525 // GTP binding // traceable author…	---
201009_s_at	TXNIP	2.59484	1.12027	0.431729	2.17387	0	10.4949	7.71384	7.71261	9.00269	8.66429	1.12027	2.17387	0.02206	AI439556	thioredoxin interacting protein	TXNIP	NM_006472	0000122 // negative regulation of transcription from RNA polymerase II promoter // inferred from electronic annotation /// 0006350 // transcription // inferred from electronic annotation /// 0006606 // protein import into nucleus // inferred from electronic annotation /// 0006979 // response to oxidative stress // inferred from electronic annotation /// 0007049 // cell cycle // inferred from elec…	0005634 // nucleus // inferred from electronic annotation /// 0005737 // cytoplasm // inferred from direct assay /// 0005737 // cytoplasm // inferred from electronic annotation /// 0005758 // mitochondrial intermembrane space // inferred from electronic annotation	0004857 // enzyme inhibitor activity // inferred from electronic annotation /// 0005515 // protein binding // inferred from physical interaction /// 0005515 // protein binding // inferred from electronic annotation /// 0031625 // ubiquitin protein ligase binding // inferred from physical interaction	---
228597_at	C21orf45	2.38835	1.12006	0.468967	2.17356	0.0523603	12.8045	7.80546	7.52386	8.93569	8.63374	1.12006	2.17356	0.0323324	AW151538	chromosome 21 open reading frame 45	C21orf45	NM_018944	0007049 // cell cycle // inferred from electronic annotation /// 0007067 // mitosis // inferred from electronic annotation /// 0051301 // cell division // inferred from electronic annotation	0000775 // chromosome, centromeric region // inferred from electronic annotation /// 0005634 // nucleus // inferred from electronic annotation	---	---
231396_s_at	FAM126A	2.94485	1.11995	0.380309	2.1734	0	7.09328	6.00252	6.23564	7.22212	7.25594	1.11995	2.1734	0.0108797	AA776721	family with sequence similarity 126, member A	FAM126A	NM_032581	---	0005737 // cytoplasm // inferred from electronic annotation /// 0016020 // membrane // inferred from electronic annotation	0004871 // signal transducer activity // non-traceable author statement	---
220840_s_at	C1orf112	2.58628	1.11916	0.43273	2.17221	0	10.5862	7.87757	8.20077	9.21176	9.10491	1.11916	2.17221	0.0223559	NM_018186	chromosome 1 open reading frame 112	C1orf112	NM_018186	---	---	---	---
211088_s_at	PLK4	3.6783	1.11778	0.303883	2.17012	0	2.06449	5.45645	5.4648	6.53726	6.61955	1.11778	2.17012	0.00136608	Z25433	polo-like kinase 4	PLK4	NM_001190799 /// NM_001190801 /// NM_014264	0006468 // protein phosphorylation // inferred from electronic annotation /// 0006468 // protein phosphorylation // traceable author statement /// 0046601 // positive regulation of centriole replication // inferred from mutant phenotype /// 0060707 // trophoblast giant cell differentiation // inferred from sequence or structural similarity /// 0060707 // trophoblast giant cell differentiation // …	0005634 // nucleus // inferred from electronic annotation /// 0005730 // nucleolus // inferred from sequence or structural similarity /// 0005730 // nucleolus // inferred from electronic annotation /// 0005737 // cytoplasm // inferred from electronic annotation /// 0005814 // centriole // inferred from direct assay /// 0005814 // centriole // inferred from electronic annotation /// 0005829 // cyt…	0000166 // nucleotide binding // inferred from electronic annotation /// 0004672 // protein kinase activity // inferred from electronic annotation /// 0004674 // protein serine/threonine kinase activity // inferred from sequence or structural similarity /// 0004674 // protein serine/threonine kinase activity // inferred from electronic annotation /// 0004674 // protein serine/threonine kinase act…	---
212694_s_at	PCCB	3.07172	1.1177	0.363868	2.17001	0	6.02339	9.2542	9.24662	10.4694	10.2668	1.1177	2.17001	0.00812087	NM_000532	propionyl CoA carboxylase, beta polypeptide	PCCB	NM_000532 /// NM_001178014	0006633 // fatty acid biosynthetic process // inferred from electronic annotation	0005739 // mitochondrion // inferred from electronic annotation /// 0005739 // mitochondrion // traceable author statement /// 0005759 // mitochondrial matrix // inferred from electronic annotation /// 0009317 // acetyl-CoA carboxylase complex // inferred from electronic annotation	0000166 // nucleotide binding // inferred from electronic annotation /// 0003989 // acetyl-CoA carboxylase activity // inferred from electronic annotation /// 0004658 // propionyl-CoA carboxylase activity // inferred from electronic annotation /// 0004658 // propionyl-CoA carboxylase activity // traceable author statement /// 0005524 // ATP binding // inferred from electronic annotation /// 00168…	---
234672_s_at	TMEM48	3.55972	1.11599	0.313507	2.16744	0	2.69614	9.55022	9.48682	10.6744	10.5946	1.11599	2.16744	0.00208019	AL354612	transmembrane protein 48	TMEM48	NM_001168551 /// NM_018087 /// NR_033142	0006810 // transport // inferred from electronic annotation /// 0015031 // protein transport // non-traceable author statement /// 0015031 // protein transport // inferred from electronic annotation /// 0031081 // nuclear pore distribution // inferred from mutant phenotype /// 0051028 // mRNA transport // inferred from electronic annotation /// 0051292 // nuclear pore complex assembly // inferred…	0005634 // nucleus // inferred from electronic annotation /// 0005643 // nuclear pore // inferred from direct assay /// 0005643 // nuclear pore // inferred from electronic annotation /// 0016020 // membrane // inferred from electronic annotation /// 0016021 // integral to membrane // inferred from electronic annotation /// 0031965 // nuclear membrane // inferred from electronic annotation	0005515 // protein binding // inferred from physical interaction /// 0005515 // protein binding // inferred from electronic annotation /// 0017056 // structural constituent of nuclear pore // inferred from mutant phenotype	---
230988_at	ADD2	3.27289	1.11153	0.339617	2.16074	0	4.50377	7.45307	7.54452	8.54826	8.67239	1.11153	2.16074	0.00477559	AU149490	adducin 2 (beta)	ADD2	NM_001185054 /// NM_001185055 /// NM_001617 /// NM_017482 /// NM_017488	0006811 // ion transport // inferred from electronic annotation /// 0030036 // actin cytoskeleton organization // inferred by curator /// 0030097 // hemopoiesis // inferred from electronic annotation /// 0032092 // positive regulation of protein binding // inferred from direct assay /// 0051016 // barbed-end actin filament capping // inferred from direct assay /// 0051017 // actin filament bundle…	0005737 // cytoplasm // inferred from electronic annotation /// 0005856 // cytoskeleton // inferred from electronic annotation /// 0005886 // plasma membrane // inferred from electronic annotation /// 0008290 // F-actin capping protein complex // inferred from direct assay /// 0016020 // membrane // inferred from electronic annotation	0003779 // actin binding // traceable author statement /// 0003779 // actin binding // inferred from electronic annotation /// 0005198 // structural molecule activity // inferred from electronic annotation /// 0005516 // calmodulin binding // inferred from electronic annotation /// 0030507 // spectrin binding // inferred from direct assay /// 0042803 // protein homodimerization activity // inferr…	---
244669_at	SNHG5 /// SNORD50A /// SNORD50B	2.48173	1.11096	0.447656	2.1599	0.0391894	11.7326	7.66062	7.29966	8.63234	8.54987	1.11096	2.1599	0.0266627	T16443	small nucleolar RNA host gene 5 (non-protein coding) /// small nucleolar RNA, C/D box 50A /// small nucleolar RNA, C/D box 50B	SNHG5 /// SNORD50A /// SNORD50B	NR_002743 /// NR_003038 /// NR_003044	---	---	---	---
223758_s_at	GTF2H2	3.12185	1.10993	0.355538	2.15836	0	5.62464	8.82243	8.63823	9.82729	9.85324	1.10993	2.15836	0.00694897	BC005345	general transcription factor IIH, polypeptide 2, 44kDa	GTF2H2	NM_001515	0000718 // nucleotide-excision repair, DNA damage removal // not recorded /// 0002031 // G-protein coupled receptor internalization // inferred from mutant phenotype /// 0006281 // DNA repair // inferred from electronic annotation /// 0006350 // transcription // inferred from electronic annotation /// 0006366 // transcription from RNA polymerase II promoter // inferred from direct assay /// 00063…	0005622 // intracellular // inferred from electronic annotation /// 0005634 // nucleus // inferred from electronic annotation /// 0005654 // nucleoplasm // not recorded /// 0005675 // holo TFIIH complex // inferred from direct assay	0003676 // nucleic acid binding // traceable author statement /// 0003700 // sequence-specific DNA binding transcription factor activity // non-traceable author statement /// 0004672 // protein kinase activity // inferred from direct assay /// 0005515 // protein binding // inferred from physical interaction /// 0008094 // DNA-dependent ATPase activity // inferred from direct assay /// 0008135 // …	RNA_transcription_Reactome // GenMAPP
211506_s_at	IL8	3.3755	1.10974	0.328763	2.15807	0	3.80997	9.01432	9.05513	10.0815	10.2075	1.10974	2.15807	0.00354341	AF043337	interleukin 8	IL8	NM_000584	0001525 // angiogenesis // traceable author statement /// 0006928 // cellular component movement // traceable author statement /// 0006935 // chemotaxis // inferred from electronic annotation /// 0006954 // inflammatory response // traceable author statement /// 0006954 // inflammatory response // inferred from electronic annotation /// 0006955 // immune response // inferred from electronic annot…	0005576 // extracellular region // not recorded /// 0005576 // extracellular region // inferred from electronic annotation /// 0005615 // extracellular space // inferred from electronic annotation /// 0005615 // extracellular space // traceable author statement	0005125 // cytokine activity // inferred from electronic annotation /// 0005153 // interleukin-8 receptor binding // inferred from physical interaction /// 0005515 // protein binding // inferred from physical interaction /// 0008009 // chemokine activity // inferred from electronic annotation /// 0008009 // chemokine activity // traceable author statement	---
213092_x_at	DNAJC9	2.64643	1.10929	0.419165	2.1574	0	9.9526	9.16747	9.21881	10.457	10.1479	1.10929	2.1574	0.0193617	AW241779	DnaJ (Hsp40) homolog, subfamily C, member 9	DNAJC9	NM_015190	0006412 // translation // inferred from electronic annotation	0005622 // intracellular // inferred from electronic annotation /// 0005840 // ribosome // inferred from electronic annotation	0003735 // structural constituent of ribosome // inferred from electronic annotation /// 0031072 // heat shock protein binding // inferred from electronic annotation	---
218662_s_at	NCAPG	3.80077	1.10913	0.291816	2.15715	0	1.47875	9.14825	9.13087	10.2767	10.2207	1.10913	2.15715	0.000696587	NM_022346	non-SMC condensin I complex, subunit G	NCAPG	NM_022346	0007049 // cell cycle // inferred from electronic annotation /// 0007067 // mitosis // inferred from electronic annotation /// 0007076 // mitotic chromosome condensation // inferred from direct assay /// 0007076 // mitotic chromosome condensation // non-traceable author statement /// 0030261 // chromosome condensation // inferred from electronic annotation /// 0051301 // cell division // inferred…	0000796 // condensin complex // inferred from direct assay /// 0005634 // nucleus // non-traceable author statement /// 0005634 // nucleus // inferred from electronic annotation /// 0005737 // cytoplasm // inferred from electronic annotation	0005488 // binding // inferred from electronic annotation /// 0005515 // protein binding // inferred from physical interaction	---
207828_s_at	CENPF	2.33878	1.10905	0.474202	2.15704	0.0523603	13.3916	8.58949	8.29459	9.70296	9.39922	1.10905	2.15704	0.0345508	NM_005196	centromere protein F, 350/400kDa (mitosin)	CENPF	NM_016343	0000085 // G2 phase of mitotic cell cycle // inferred from mutant phenotype /// 0000087 // M phase of mitotic cell cycle // inferred from direct assay /// 0000087 // M phase of mitotic cell cycle // inferred from mutant phenotype /// 0000278 // mitotic cell cycle // inferred from mutant phenotype /// 0006260 // DNA replication // inferred from electronic annotation /// 0007049 // cell cycle // in…	0000775 // chromosome, centromeric region // inferred from direct assay /// 0000775 // chromosome, centromeric region // inferred from electronic annotation /// 0000776 // kinetochore // inferred from direct assay /// 0000776 // kinetochore // inferred from electronic annotation /// 0000777 // condensed chromosome kinetochore // inferred from electronic annotation /// 0000785 // chromatin // non-…	0003682 // chromatin binding // non-traceable author statement /// 0005515 // protein binding // inferred from physical interaction /// 0008022 // protein C-terminus binding // inferred from physical interaction /// 0008134 // transcription factor binding // inferred from physical interaction /// 0042803 // protein homodimerization activity // inferred from physical interaction /// 0045502 // dyn…	---
207943_x_at	PLAGL1	2.28426	1.10898	0.485485	2.15692	0.0523603	14.0512	7.43615	7.28285	8.67784	8.25911	1.10898	2.15692	0.0381239	NM_006718	pleiomorphic adenoma gene-like 1	PLAGL1	NM_001080951 /// NM_001080952 /// NM_001080953 /// NM_001080954 /// NM_001080955 /// NM_001080956 /// NM_002656 /// NM_006718	0006350 // transcription // inferred from electronic annotation /// 0006917 // induction of apoptosis // traceable author statement /// 0007050 // cell cycle arrest // traceable author statement /// 0045449 // regulation of transcription // inferred from electronic annotation /// 0045944 // positive regulation of transcription from RNA polymerase II promoter // inferred from direct assay	0005622 // intracellular // inferred from electronic annotation /// 0005634 // nucleus // inferred from electronic annotation	0003676 // nucleic acid binding // inferred from electronic annotation /// 0003677 // DNA binding // inferred from direct assay /// 0003677 // DNA binding // inferred from electronic annotation /// 0005515 // protein binding // inferred from electronic annotation /// 0008270 // zinc ion binding // inferred from electronic annotation /// 0046872 // metal ion binding // inferred from electronic ann…	---
221952_x_at	TRMT5	3.03009	1.10814	0.365712	2.15568	0	6.36483	10.9213	11.0635	12.1753	12.0258	1.10814	2.15568	0.00855928	AB037814	TRM5 tRNA methyltransferase 5 homolog (S. cerevisiae)	TRMT5	NM_020810	0008033 // tRNA processing // inferred from electronic annotation	0005737 // cytoplasm // inferred from electronic annotation	0008168 // methyltransferase activity // inferred from electronic annotation /// 0009019 // tRNA (guanine-N1-)-methyltransferase activity // inferred from electronic annotation /// 0016740 // transferase activity // inferred from electronic annotation	---
218212_s_at	MOCS2	2.24043	1.1059	0.49361	2.15233	0.0523603	14.5916	8.52114	8.84084	9.95376	9.62001	1.1059	2.15233	0.0409959	NM_004531	molybdenum cofactor synthesis 2	MOCS2	NM_004531 /// NM_176806	0006777 // Mo-molybdopterin cofactor biosynthetic process // inferred from direct assay /// 0006777 // Mo-molybdopterin cofactor biosynthetic process // inferred from mutant phenotype /// 0006777 // Mo-molybdopterin cofactor biosynthetic process // inferred from electronic annotation /// 0006790 // sulfur compound metabolic process // inferred from electronic annotation	0005737 // cytoplasm // inferred from electronic annotation /// 0005829 // cytosol // inferred from direct assay /// 0005829 // cytosol // inferred from electronic annotation /// 0019008 // molybdopterin synthase complex // inferred from physical interaction /// 0019008 // molybdopterin synthase complex // non-traceable author statement	0000166 // nucleotide binding // inferred from electronic annotation /// 0016740 // transferase activity // inferred from electronic annotation /// 0030366 // Mo-molybdopterin synthase activity // inferred from direct assay /// 0042802 // identical protein binding // inferred from electronic annotation	---
216977_x_at	SNRPA1	3.05769	1.10574	0.361625	2.15209	0	6.13737	8.87888	8.691	9.92224	9.85912	1.10574	2.15209	0.00793641	AJ130972	small nuclear ribonucleoprotein polypeptide A'	SNRPA1	NM_003090	0000398 // nuclear mRNA splicing, via spliceosome // inferred by curator /// 0006397 // mRNA processing // inferred from electronic annotation /// 0008380 // RNA splicing // not recorded /// 0008380 // RNA splicing // inferred from electronic annotation /// 0008380 // RNA splicing // traceable author statement	0005634 // nucleus // inferred from electronic annotation /// 0005681 // spliceosomal complex // inferred from direct assay /// 0005681 // spliceosomal complex // inferred from electronic annotation /// 0005686 // U2 snRNP // traceable author statement /// 0030529 // ribonucleoprotein complex // inferred from electronic annotation /// 0030532 // small nuclear ribonucleoprotein complex // traceabl…	0003676 // nucleic acid binding // inferred from electronic annotation /// 0003723 // RNA binding // inferred from electronic annotation /// 0005515 // protein binding // inferred from physical interaction	mRNA_processing_Reactome // GenMAPP
217725_x_at	SERBP1	3.1704	1.1003	0.347052	2.14399	0	5.2512	10.9114	10.9619	12.1176	11.9562	1.1003	2.14399	0.00584957	NM_015640	SERPINE1 mRNA binding protein 1	SERBP1	NM_001018067 /// NM_001018068 /// NM_001018069 /// NM_015640	0043488 // regulation of mRNA stability // non-traceable author statement /// 0045767 // regulation of anti-apoptosis // inferred from electronic annotation	0005634 // nucleus // inferred from electronic annotation /// 0005737 // cytoplasm // inferred from electronic annotation /// 0005886 // plasma membrane // inferred from electronic annotation /// 0048471 // perinuclear region of cytoplasm // inferred from electronic annotation	0003723 // RNA binding // inferred from electronic annotation /// 0003730 // mRNA 3'-UTR binding // inferred from direct assay /// 0005515 // protein binding // inferred from physical interaction	---
200650_s_at	LDHA	3.53587	1.09979	0.311036	2.14323	0	2.83106	12.5101	12.5929	13.6765	13.626	1.09979	2.14323	0.00193982	NM_005566	lactate dehydrogenase A	LDHA	NM_001135239 /// NM_001165414 /// NM_001165415 /// NM_001165416 /// NM_005566 /// NR_028500	0005975 // carbohydrate metabolic process // inferred from electronic annotation /// 0006096 // glycolysis // non-traceable author statement /// 0006096 // glycolysis // inferred from electronic annotation /// 0008152 // metabolic process // inferred from electronic annotation /// 0031668 // cellular response to extracellular stimulus // inferred from electronic annotation /// 0044262 // cellular…	0005737 // cytoplasm // inferred from electronic annotation /// 0005739 // mitochondrion // inferred from electronic annotation /// 0005829 // cytosol // inferred from electronic annotation /// 0005829 // cytosol // traceable author statement /// 0019861 // flagellum // inferred from electronic annotation	0003824 // catalytic activity // inferred from electronic annotation /// 0004459 // L-lactate dehydrogenase activity // non-traceable author statement /// 0004459 // L-lactate dehydrogenase activity // inferred from electronic annotation /// 0004459 // L-lactate dehydrogenase activity // traceable author statement /// 0005488 // binding // inferred from electronic annotation /// 0005515 // protei…	Glycolysis_and_Gluconeogenesis // GenMAPP
226642_s_at	NUDCD2	3.17552	1.09779	0.345705	2.14027	0	5.2126	9.15731	9.13988	10.3291	10.1637	1.09779	2.14027	0.00569187	BF735901	NudC domain containing 2	NUDCD2	NM_145266	---	0005622 // intracellular // inferred from direct assay	---	---
209753_s_at	TMPO	3.05207	1.09433	0.358555	2.13514	0	6.18339	7.22355	7.41003	8.38817	8.43409	1.09433	2.13514	0.00761218	BG391171	thymopoietin	TMPO	NM_001032283 /// NM_001032284 /// NM_003276	0045449 // regulation of transcription // inferred from electronic annotation	0000785 // chromatin // inferred from direct assay /// 0005634 // nucleus // inferred from direct assay /// 0005634 // nucleus // inferred from electronic annotation /// 0005634 // nucleus // traceable author statement /// 0005635 // nuclear envelope // inferred from electronic annotation /// 0005635 // nuclear envelope // traceable author statement /// 0005637 // nuclear inner membrane // inferr…	0003677 // DNA binding // inferred from electronic annotation /// 0005515 // protein binding // inferred from physical interaction /// 0005515 // protein binding // inferred from electronic annotation /// 0005521 // lamin binding // traceable author statement	---
205339_at	STIL	2.58061	1.09316	0.423606	2.13341	0.0391894	10.647	8.38697	8.50365	9.68861	9.38833	1.09316	2.13341	0.0210299	NM_003035	SCL/TAL1 interrupting locus	STIL	NM_001048166 /// NM_003035	0000578 // embryonic axis specification // inferred from electronic annotation /// 0001701 // in utero embryonic development // inferred from electronic annotation /// 0001843 // neural tube closure // inferred from electronic annotation /// 0001947 // heart looping // inferred from electronic annotation /// 0007224 // smoothened signaling pathway // inferred from electronic annotation /// 000727…	0005737 // cytoplasm // inferred from electronic annotation /// 0005829 // cytosol // inferred from electronic annotation	---	---
210233_at	IL1RAP	2.01398	1.0912	0.541815	2.13052	0.117993	17.5101	6.42578	5.96898	7.12785	7.44931	1.0912	2.13052	0.0597013	AF167343	interleukin 1 receptor accessory protein	IL1RAP	NM_001167928 /// NM_001167929 /// NM_001167930 /// NM_001167931 /// NM_002182 /// NM_134470	0006461 // protein complex assembly // traceable author statement /// 0006954 // inflammatory response // traceable author statement /// 0006955 // immune response // traceable author statement /// 0007165 // signal transduction // inferred from electronic annotation /// 0019221 // cytokine-mediated signaling pathway // inferred from electronic annotation /// 0042094 // interleukin-2 biosynthetic…	0005576 // extracellular region // inferred from electronic annotation /// 0005886 // plasma membrane // not recorded /// 0005886 // plasma membrane // inferred from electronic annotation /// 0005887 // integral to plasma membrane // traceable author statement /// 0016020 // membrane // inferred from electronic annotation /// 0016021 // integral to membrane // inferred from electronic annotation …	0004871 // signal transducer activity // traceable author statement /// 0004871 // signal transducer activity // inferred from electronic annotation /// 0004872 // receptor activity // inferred from electronic annotation /// 0004888 // transmembrane receptor activity // inferred from electronic annotation /// 0004908 // interleukin-1 receptor activity // inferred from electronic annotation /// 00…	---
237411_at	ADAMTS6	1.96204	1.09082	0.55596	2.12994	0.117993	18.2057	8.20615	8.38475	9.66578	9.10675	1.09082	2.12994	0.0653489	N71063	ADAM metallopeptidase with thrombospondin type 1 motif, 6	ADAMTS6	NM_197941	0006508 // proteolysis // inferred from electronic annotation	0005576 // extracellular region // inferred from electronic annotation /// 0005578 // proteinaceous extracellular matrix // inferred from electronic annotation /// 0031012 // extracellular matrix // inferred from electronic annotation	0004222 // metalloendopeptidase activity // inferred from electronic annotation /// 0008233 // peptidase activity // inferred from electronic annotation /// 0008237 // metallopeptidase activity // traceable author statement /// 0008237 // metallopeptidase activity // inferred from electronic annotation /// 0008270 // zinc ion binding // inferred from electronic annotation /// 0016787 // hydrolase…	---
211015_s_at	HSPA4	2.81979	1.0904	0.386694	2.12932	0	8.2335	10.4343	10.2451	11.5105	11.3496	1.09039	2.12932	0.0127202	L12723	heat shock 70kDa protein 4	HSPA4	NM_002154	0006950 // response to stress // inferred from electronic annotation /// 0006986 // response to unfolded protein // non-traceable author statement /// 0009408 // response to heat // inferred from electronic annotation /// 0034619 // cellular chaperone-mediated protein complex assembly // inferred from direct assay /// 0045040 // protein import into mitochondrial outer membrane // inferred from di…	0005634 // nucleus // inferred from direct assay /// 0005737 // cytoplasm // inferred from direct assay /// 0005737 // cytoplasm // non-traceable author statement /// 0005737 // cytoplasm // inferred from electronic annotation	0000166 // nucleotide binding // inferred from electronic annotation /// 0005524 // ATP binding // non-traceable author statement /// 0005524 // ATP binding // inferred from electronic annotation	---
229886_at	C5orf34	3.52672	1.08965	0.308969	2.12822	0	2.88356	6.52361	6.45729	7.61261	7.54758	1.08965	2.12822	0.00181156	AA502768	chromosome 5 open reading frame 34	C5orf34	NM_198566	---	---	---	---
213079_at	TSR2	3.4134	1.08711	0.318483	2.12448	0	3.56722	8.76563	8.86576	9.92779	9.87782	1.08711	2.12448	0.00263889	AA223871	TSR2, 20S rRNA accumulation, homolog (S. cerevisiae)	TSR2	NM_058163	0006364 // rRNA processing // inferred from electronic annotation	---	0005515 // protein binding // inferred from physical interaction	---
216044_x_at	FAM69A	3.49788	1.08711	0.310791	2.12448	0	3.05167	6.90013	6.8072	7.95382	7.92771	1.08711	2.12448	0.00196521	AK027146	family with sequence similarity 69, member A	FAM69A	NM_001006605	0006364 // rRNA processing // inferred from mutant phenotype /// 0006412 // translation // inferred from electronic annotation /// 0006412 // translation // traceable author statement /// 0042273 // ribosomal large subunit biogenesis // inferred from mutant phenotype	0005622 // intracellular // inferred from electronic annotation /// 0005634 // nucleus // inferred from electronic annotation /// 0005730 // nucleolus // inferred from electronic annotation /// 0005737 // cytoplasm // inferred from electronic annotation /// 0005840 // ribosome // inferred from electronic annotation /// 0016020 // membrane // inferred from electronic annotation /// 0016021 // inte…	0003723 // RNA binding // inferred from electronic annotation /// 0003723 // RNA binding // traceable author statement /// 0003735 // structural constituent of ribosome // inferred from electronic annotation /// 0003735 // structural constituent of ribosome // traceable author statement /// 0005515 // protein binding // inferred from electronic annotation /// 0005515 // protein binding // inferre…	Ribosomal_Proteins // GenMAPP
218712_at	C1orf109	2.37876	1.08624	0.45664	2.1232	0.0523603	12.9171	7.70778	7.76955	9.01654	8.63326	1.08624	2.1232	0.0304817	NM_017850	chromosome 1 open reading frame 109	C1orf109	NM_017850	---	---	---	---
1567214_a_at	PNN	1.80828	1.08347	0.599171	2.11913	0.143798	20.3119	9.59174	9.05228	10.6069	10.2041	1.08347	2.11913	0.0844854	U59479	pinin, desmosome associated protein	PNN	NM_002687	0006350 // transcription // inferred from electronic annotation /// 0006397 // mRNA processing // inferred from electronic annotation /// 0007155 // cell adhesion // traceable author statement /// 0008380 // RNA splicing // inferred from electronic annotation /// 0045449 // regulation of transcription // inferred from electronic annotation	0005634 // nucleus // inferred from direct assay /// 0005634 // nucleus // inferred from electronic annotation /// 0005681 // spliceosomal complex // inferred from electronic annotation /// 0005730 // nucleolus // inferred from direct assay /// 0005737 // cytoplasm // inferred from electronic annotation /// 0005882 // intermediate filament // traceable author statement /// 0005886 // plasma membr…	0003677 // DNA binding // inferred from electronic annotation /// 0005198 // structural molecule activity // non-traceable author statement /// 0005515 // protein binding // inferred from physical interaction	---
205140_at	FPGT	1.97184	1.08342	0.549447	2.11906	0.117993	18.0738	5.62517	5.80827	7.07206	6.52822	1.08342	2.11906	0.0635236	NM_003838	fucose-1-phosphate guanylyltransferase	FPGT	NM_003838	0006004 // fucose metabolic process // traceable author statement	0005737 // cytoplasm // inferred from electronic annotation /// 0005737 // cytoplasm // traceable author statement	0000166 // nucleotide binding // inferred from electronic annotation /// 0003824 // catalytic activity // traceable author statement /// 0005525 // GTP binding // inferred from electronic annotation /// 0016740 // transferase activity // inferred from electronic annotation /// 0016779 // nucleotidyltransferase activity // inferred from electronic annotation /// 0047341 // fucose-1-phosphate guany…	---
209274_s_at	ISCA1	2.17993	1.08304	0.496825	2.1185	0.0523603	15.3514	9.28086	9.36827	10.6378	10.1774	1.08304	2.1185	0.0437515	BC002675	iron-sulfur cluster assembly 1 homolog (S. cerevisiae)	ISCA1	NM_030940	0016226 // iron-sulfur cluster assembly // inferred from electronic annotation	0005739 // mitochondrion // inferred from electronic annotation	0005198 // structural molecule activity // inferred from electronic annotation /// 0046872 // metal ion binding // inferred from electronic annotation /// 0051536 // iron-sulfur cluster binding // inferred from electronic annotation	---
211653_x_at	AKR1C2	2.13716	1.08273	0.506619	2.11803	0.0904263	15.8976	7.99763	8.21748	8.97234	9.40822	1.08273	2.11803	0.0472506	M33376	aldo-keto reductase family 1, member C2 (dihydrodiol dehydrogenase 2; bile acid binding protein; 3-alpha hydroxysteroid dehydrogenase, type III)	AKR1C2	NM_001135241 /// NM_001354 /// NM_205845	0006629 // lipid metabolic process // inferred from electronic annotation /// 0006693 // prostaglandin metabolic process // inferred from direct assay /// 0007586 // digestion // inferred from direct assay /// 0008202 // steroid metabolic process // inferred from direct assay /// 0008202 // steroid metabolic process // inferred from electronic annotation /// 0055114 // oxidation reduction // infe…	0005737 // cytoplasm // inferred from electronic annotation	0016491 // oxidoreductase activity // inferred from electronic annotation /// 0031406 // carboxylic acid binding // inferred from direct assay /// 0032052 // bile acid binding // inferred from direct assay /// 0047026 // 3-alpha-hydroxysteroid dehydrogenase (A-specific) activity // inferred from electronic annotation /// 0047115 // trans-1,2-dihydrobenzene-1,2-diol dehydrogenase activity // infer…	---
229610_at	CKAP2L	2.70539	1.08169	0.39983	2.11652	0	9.35001	8.94562	8.67746	9.92282	9.86365	1.08169	2.11652	0.0157326	AW088063	cytoskeleton associated protein 2-like	CKAP2L	NM_152515	---	---	---	---
209680_s_at	KIFC1	3.34346	1.08133	0.323418	2.11599	0	4.02086	8.59278	8.61808	9.6272	9.74633	1.08133	2.11599	0.00315584	BC000712	kinesin family member C1	KIFC1	NM_002263	0000070 // mitotic sister chromatid segregation // non-traceable author statement /// 0007018 // microtubule-based movement // inferred from electronic annotation /// 0007049 // cell cycle // inferred from electronic annotation /// 0007067 // mitosis // inferred from electronic annotation /// 0051301 // cell division // inferred from electronic annotation	0005634 // nucleus // inferred from electronic annotation /// 0005737 // cytoplasm // inferred from electronic annotation /// 0005768 // endosome // inferred from electronic annotation /// 0005769 // early endosome // inferred from electronic annotation /// 0005815 // microtubule organizing center // inferred from electronic annotation /// 0005819 // spindle // inferred from electronic annotation…	0000166 // nucleotide binding // inferred from electronic annotation /// 0003774 // motor activity // inferred from electronic annotation /// 0003777 // microtubule motor activity // non-traceable author statement /// 0003777 // microtubule motor activity // inferred from electronic annotation /// 0005524 // ATP binding // non-traceable author statement /// 0005524 // ATP binding // inferred from…	---
212328_at	LIMCH1	2.14608	1.08074	0.503587	2.11512	0.0523603	15.7831	7.84779	8.21068	9.26868	8.95127	1.08074	2.11512	0.0463219	AB029025	LIM and calponin homology domains 1	LIMCH1	NM_001112717 /// NM_001112718 /// NM_001112719 /// NM_001112720 /// NM_014988	0031032 // actomyosin structure organization // inferred from electronic annotation	---	0003779 // actin binding // inferred from electronic annotation /// 0008270 // zinc ion binding // inferred from electronic annotation /// 0046872 // metal ion binding // inferred from electronic annotation	---
205393_s_at	CHEK1	2.76283	1.07908	0.390571	2.11269	0	8.78064	8.49243	8.67677	9.75256	9.5748	1.07908	2.11269	0.0137896	NM_001274	CHK1 checkpoint homolog (S. pombe)	CHEK1	NM_001114121 /// NM_001114122 /// NM_001274	0000077 // DNA damage checkpoint // inferred from mutant phenotype /// 0000077 // DNA damage checkpoint // inferred from electronic annotation /// 0000077 // DNA damage checkpoint // traceable author statement /// 0000079 // regulation of cyclin-dependent protein kinase activity // traceable author statement /// 0000086 // G2/M transition of mitotic cell cycle // inferred from electronic annotati…	0000781 // chromosome, telomeric region // inferred from direct assay /// 0000794 // condensed nuclear chromosome // traceable author statement /// 0005634 // nucleus // inferred from electronic annotation /// 0005654 // nucleoplasm // not recorded /// 0005657 // replication fork // inferred from electronic annotation /// 0005737 // cytoplasm // inferred from electronic annotation /// 0005815 // …	0000166 // nucleotide binding // inferred from electronic annotation /// 0004672 // protein kinase activity // traceable author statement /// 0004672 // protein kinase activity // inferred from electronic annotation /// 0004674 // protein serine/threonine kinase activity // not recorded /// 0004674 // protein serine/threonine kinase activity // inferred from electronic annotation /// 0005515 // p…	Cell_cycle_KEGG // GenMAPP
207627_s_at	TFCP2	2.61229	1.07872	0.412939	2.11215	0	10.3099	6.28775	6.47119	7.33898	7.5774	1.07872	2.11215	0.0188932	NM_005653	transcription factor CP2	TFCP2	NM_001173452 /// NM_001173453 /// NM_005653	0006350 // transcription // inferred from electronic annotation /// 0006357 // regulation of transcription from RNA polymerase II promoter // traceable author statement /// 0045449 // regulation of transcription // inferred from electronic annotation	0005634 // nucleus // inferred from electronic annotation	0003677 // DNA binding // inferred from electronic annotation /// 0003677 // DNA binding // traceable author statement /// 0003700 // sequence-specific DNA binding transcription factor activity // traceable author statement	---
221258_s_at	KIF18A	1.67808	1.07745	0.64207	2.1103	0.143798	22.1394	6.22075	5.89687	7.47952	6.793	1.07745	2.1103	0.104919	NM_031217	kinesin family member 18A	KIF18A	NM_031217	0006810 // transport // inferred from electronic annotation /// 0007018 // microtubule-based movement // inferred from electronic annotation /// 0007019 // microtubule depolymerization // inferred from direct assay /// 0007080 // mitotic metaphase plate congression // inferred from direct assay /// 0015031 // protein transport // inferred from electronic annotation	0001726 // ruffle // inferred from direct assay /// 0001726 // ruffle // inferred from electronic annotation /// 0005634 // nucleus // inferred from direct assay /// 0005634 // nucleus // inferred from electronic annotation /// 0005737 // cytoplasm // inferred from direct assay /// 0005737 // cytoplasm // inferred from electronic annotation /// 0005815 // microtubule organizing center // inferred…	0000166 // nucleotide binding // inferred from electronic annotation /// 0003774 // motor activity // inferred from electronic annotation /// 0003777 // microtubule motor activity // inferred from electronic annotation /// 0003779 // actin binding // inferred from physical interaction /// 0005515 // protein binding // inferred from physical interaction /// 0005524 // ATP binding // inferred from …	---
227399_at	VGLL3	2.0593	1.07695	0.522967	2.10956	0.0904263	16.9105	8.01243	8.02157	9.35434	8.83355	1.07695	2.10956	0.0538059	AI754423	vestigial like 3 (Drosophila)	VGLL3	NM_016206	0006350 // transcription // inferred from electronic annotation /// 0045449 // regulation of transcription // inferred from electronic annotation	0005634 // nucleus // inferred from electronic annotation	0030528 // transcription regulator activity // inferred from electronic annotation	---
211114_x_at	SIP1	2.19406	1.07393	0.489471	2.10516	0.0523603	15.1724	7.3476	7.50546	8.71323	8.28768	1.07393	2.10516	0.0418716	AB037702	survival of motor neuron protein interacting protein 1	SIP1	NM_001009182 /// NM_001009183 /// NM_003616	0000245 // spliceosome assembly // inferred from electronic annotation /// 0000245 // spliceosome assembly // traceable author statement /// 0000375 // RNA splicing, via transesterification reactions // traceable author statement /// 0000387 // spliceosomal snRNP assembly // not recorded /// 0000398 // nuclear mRNA splicing, via spliceosome // inferred from electronic annotation /// 0006397 // mR…	0005622 // intracellular // inferred from electronic annotation /// 0005634 // nucleus // inferred from electronic annotation /// 0005634 // nucleus // traceable author statement /// 0005654 // nucleoplasm // not recorded /// 0005681 // spliceosomal complex // inferred from electronic annotation /// 0005681 // spliceosomal complex // traceable author statement /// 0005737 // cytoplasm // inferred…	0005515 // protein binding // inferred from physical interaction	---
205412_at	ACAT1	2.82109	1.07348	0.380518	2.1045	0	8.22116	9.20256	9.43431	10.4142	10.3697	1.07348	2.1045	0.0118666	NM_000019	acetyl-CoA acetyltransferase 1	ACAT1	NM_000019	0008152 // metabolic process // inferred from electronic annotation	0005739 // mitochondrion // inferred from direct assay /// 0005739 // mitochondrion // inferred from electronic annotation /// 0005739 // mitochondrion // traceable author statement /// 0005743 // mitochondrial inner membrane // inferred from electronic annotation /// 0005759 // mitochondrial matrix // not recorded	0003824 // catalytic activity // inferred from electronic annotation /// 0003985 // acetyl-CoA C-acetyltransferase activity // not recorded /// 0003985 // acetyl-CoA C-acetyltransferase activity // inferred from electronic annotation /// 0003985 // acetyl-CoA C-acetyltransferase activity // traceable author statement /// 0005515 // protein binding // inferred from physical interaction /// 0008415…	Synthesis_and_Degradation_of_Keton_Bodies_KEGG // GenMAPP
223480_s_at	MRPL47	2.96942	1.07276	0.361271	2.10346	0	6.87924	10.5968	10.4805	11.5316	11.6913	1.07276	2.10346	0.00836617	AI189156	mitochondrial ribosomal protein L47	MRPL47	NM_020409 /// NM_177988	0006412 // translation // inferred from electronic annotation	0005739 // mitochondrion // inferred from electronic annotation /// 0005761 // mitochondrial ribosome // inferred from electronic annotation /// 0005840 // ribosome // inferred from electronic annotation /// 0030529 // ribonucleoprotein complex // inferred from electronic annotation	0003735 // structural constituent of ribosome // inferred from electronic annotation	---
237215_s_at	TFRC	2.9359	1.07266	0.365359	2.10331	0	7.17206	8.50232	8.56438	9.70405	9.50797	1.07266	2.10331	0.0090655	N76327	transferrin receptor (p90, CD71)	TFRC	NM_001128148 /// NM_003234	0001666 // response to hypoxia // inferred from electronic annotation /// 0006508 // proteolysis // inferred from electronic annotation /// 0006879 // cellular iron ion homeostasis // non-traceable author statement /// 0006879 // cellular iron ion homeostasis // inferred from electronic annotation /// 0006879 // cellular iron ion homeostasis // traceable author statement /// 0006897 // endocytosi…	0005576 // extracellular region // inferred from direct assay /// 0005576 // extracellular region // inferred from electronic annotation /// 0005739 // mitochondrion // inferred from electronic annotation /// 0005768 // endosome // inferred from direct assay /// 0005768 // endosome // inferred from electronic annotation /// 0005768 // endosome // traceable author statement /// 0005886 // plasma m…	0004872 // receptor activity // inferred from electronic annotation /// 0004998 // transferrin receptor activity // non-traceable author statement /// 0004998 // transferrin receptor activity // traceable author statement /// 0008233 // peptidase activity // inferred from electronic annotation	---
203708_at	PDE4B	2.18516	1.06933	0.489362	2.09847	0.0523603	15.285	6.42793	6.12064	7.17674	7.51049	1.06933	2.09847	0.0421718	NM_002600	phosphodiesterase 4B, cAMP-specific	PDE4B	NM_001037339 /// NM_001037340 /// NM_001037341 /// NM_002600	0006198 // cAMP catabolic process // inferred from electronic annotation /// 0007165 // signal transduction // inferred from electronic annotation	0005625 // soluble fraction // inferred from electronic annotation /// 0005625 // soluble fraction // traceable author statement /// 0005626 // insoluble fraction // inferred from electronic annotation /// 0005626 // insoluble fraction // traceable author statement /// 0005634 // nucleus // inferred from electronic annotation /// 0005737 // cytoplasm // inferred from electronic annotation /// 000…	0003824 // catalytic activity // inferred from electronic annotation /// 0004114 // 3',5'-cyclic-nucleotide phosphodiesterase activity // inferred from electronic annotation /// 0004115 // 3',5'-cyclic-AMP phosphodiesterase activity // not recorded /// 0004115 // 3',5'-cyclic-AMP phosphodiesterase activity // inferred from electronic annotation /// 0004115 // 3',5'-cyclic-AMP phosphodiesterase ac…	G_Protein_Signaling // GenMAPP /// Smooth_muscle_contraction // GenMAPP
201459_at	RUVBL2	2.79999	1.06909	0.381818	2.0981	0	8.42176	10.5989	10.6129	11.5559	11.794	1.06908	2.0981	0.0122227	NM_006666	RuvB-like 2 (E. coli)	RUVBL2	NM_006666	0006281 // DNA repair // inferred from electronic annotation /// 0006281 // DNA repair // traceable author statement /// 0006310 // DNA recombination // inferred from electronic annotation /// 0006310 // DNA recombination // traceable author statement /// 0006350 // transcription // inferred from electronic annotation /// 0006457 // protein folding // traceable author statement /// 0016568 // chr…	0005622 // intracellular // inferred from direct assay /// 0005634 // nucleus // inferred from direct assay /// 0005634 // nucleus // inferred from electronic annotation /// 0005654 // nucleoplasm // inferred from electronic annotation /// 0005737 // cytoplasm // inferred from electronic annotation /// 0016020 // membrane // inferred from electronic annotation /// 0016363 // nuclear matrix // inf…	0000166 // nucleotide binding // inferred from electronic annotation /// 0003678 // DNA helicase activity // inferred from direct assay /// 0003678 // DNA helicase activity // inferred from electronic annotation /// 0003684 // damaged DNA binding // inferred from electronic annotation /// 0004003 // ATP-dependent DNA helicase activity // traceable author statement /// 0004386 // helicase activity…	---
228530_at	C13orf37	1.78088	1.06791	0.599654	2.0964	0.143798	20.6936	5.28167	5.26222	6.67684	6.00287	1.06792	2.0964	0.086869	AA648525	Chromosome 13 open reading frame 37	C13orf37	NM_001071775	0033566 // gamma-tubulin complex localization // inferred from mutant phenotype	0005737 // cytoplasm // inferred from electronic annotation /// 0005813 // centrosome // inferred from direct assay /// 0005815 // microtubule organizing center // inferred from electronic annotation /// 0005819 // spindle // inferred from direct assay /// 0005819 // spindle // inferred from electronic annotation /// 0005856 // cytoskeleton // inferred from electronic annotation /// 0008274 // ga…	0005515 // protein binding // inferred from physical interaction	---
227869_at	FAM104B	2.01118	1.06651	0.530289	2.09436	0.117993	17.5474	8.34045	7.95441	9.39952	9.02835	1.06651	2.09436	0.0576376	BG500573	family with sequence similarity 104, member B	FAM104B	NM_001166699 /// NM_001166700 /// NM_001166701 /// NM_001166702 /// NM_001166703 /// NM_001166704 /// NM_138362 /// NR_030722	0005975 // carbohydrate metabolic process // inferred from electronic annotation /// 0005975 // carbohydrate metabolic process // traceable author statement /// 0006486 // protein glycosylation // non-traceable author statement /// 0006486 // protein glycosylation // traceable author statement /// 0042355 // L-fucose catabolic process // non-traceable author statement	0005794 // Golgi apparatus // inferred from electronic annotation /// 0005794 // Golgi apparatus // traceable author statement /// 0016020 // membrane // inferred from electronic annotation /// 0016021 // integral to membrane // inferred from electronic annotation /// 0030173 // integral to Golgi membrane // non-traceable author statement /// 0032580 // Golgi cisterna membrane // inferred from el…	0008107 // galactoside 2-alpha-L-fucosyltransferase activity // inferred from electronic annotation /// 0008107 // galactoside 2-alpha-L-fucosyltransferase activity // traceable author statement /// 0008417 // fucosyltransferase activity // traceable author statement /// 0016740 // transferase activity // inferred from electronic annotation /// 0016757 // transferase activity, transferring glycos…	---
202589_at	TYMS	3.16122	1.06642	0.337346	2.09424	0	5.3209	11.812	11.6855	12.8552	12.7752	1.06643	2.09424	0.00488618	NM_001071	thymidylate synthetase	TYMS	NM_001071	0006139 // nucleobase, nucleoside, nucleotide and nucleic acid metabolic process // traceable author statement /// 0006231 // dTMP biosynthetic process // inferred from electronic annotation /// 0006260 // DNA replication // non-traceable author statement /// 0006281 // DNA repair // non-traceable author statement /// 0009157 // deoxyribonucleoside monophosphate biosynthetic process // traceable …	---	0000166 // nucleotide binding // inferred from electronic annotation /// 0004799 // thymidylate synthase activity // inferred from electronic annotation /// 0008168 // methyltransferase activity // inferred from electronic annotation /// 0016740 // transferase activity // inferred from electronic annotation /// 0048037 // cofactor binding // inferred from electronic annotation	---			TYMS	thymidylate synthetase
213302_at	PFAS	3.01141	1.06625	0.354069	2.09398	0	6.52107	9.44368	9.62675	10.6002	10.6027	1.06625	2.09398	0.0072904	AL044326	phosphoribosylformylglycinamidine synthase	PFAS	NM_012393	0006164 // purine nucleotide biosynthetic process // inferred from electronic annotation /// 0006189 // 'de novo' IMP biosynthetic process // non-traceable author statement /// 0006189 // 'de novo' IMP biosynthetic process // inferred from electronic annotation /// 0006541 // glutamine metabolic process // inferred from electronic annotation /// 0009168 // purine ribonucleoside monophosphate bios…	0005737 // cytoplasm // non-traceable author statement /// 0005737 // cytoplasm // inferred from electronic annotation	0000166 // nucleotide binding // inferred from electronic annotation /// 0003824 // catalytic activity // inferred from electronic annotation /// 0004642 // phosphoribosylformylglycinamidine synthase activity // inferred from direct assay /// 0004642 // phosphoribosylformylglycinamidine synthase activity // inferred from electronic annotation /// 0005515 // protein binding // inferred from physic…	---
238508_at	DBF4B	2.70294	1.06619	0.394456	2.09389	0	9.37468	7.03149	7.25995	8.27791	8.14591	1.06619	2.09389	0.0149682	BG026951	DBF4 homolog B (S. cerevisiae)	DBF4B	NM_025104 /// NM_145663 /// NR_036623	0007049 // cell cycle // inferred from electronic annotation	0005634 // nucleus // inferred from electronic annotation	0003676 // nucleic acid binding // inferred from electronic annotation /// 0008270 // zinc ion binding // inferred from electronic annotation /// 0046872 // metal ion binding // inferred from electronic annotation	---
223530_at	TDRKH	2.50762	1.06602	0.42511	2.09364	0.0391894	11.4434	7.21156	7.01354	8.30753	8.04961	1.06602	2.09364	0.0224792	AF227192	tudor and KH domain containing	TDRKH	NM_001083963 /// NM_001083964 /// NM_001083965 /// NM_006862	---	0005739 // mitochondrion // inferred from electronic annotation	0003676 // nucleic acid binding // inferred from electronic annotation /// 0003723 // RNA binding // inferred from electronic annotation	---
227896_at	BCCIP	2.84476	1.0651	0.374408	2.09231	0	7.99911	7.92002	8.0691	9.14309	8.97622	1.0651	2.09231	0.0108545	AI373643	BRCA2 and CDKN1A interacting protein	BCCIP	NM_016567 /// NM_078468 /// NM_078469	0000079 // regulation of cyclin-dependent protein kinase activity // inferred from direct assay /// 0000079 // regulation of cyclin-dependent protein kinase activity // traceable author statement /// 0006281 // DNA repair // inferred from electronic annotation /// 0006974 // response to DNA damage stimulus // inferred from electronic annotation /// 0007049 // cell cycle // inferred from electroni…	0005634 // nucleus // inferred from electronic annotation /// 0005634 // nucleus // traceable author statement /// 0019908 // nuclear cyclin-dependent protein kinase holoenzyme complex // inferred from direct assay	0005515 // protein binding // inferred from physical interaction /// 0019207 // kinase regulator activity // inferred from direct assay	---
204337_at	RGS4	2.35744	1.06216	0.450555	2.08805	0.0523603	13.1692	6.00628	6.04872	7.27648	6.90283	1.06216	2.08805	0.0299375	AL514445	regulator of G-protein signaling 4	RGS4	NM_001102445 /// NM_001113380 /// NM_001113381 /// NM_005613	0000188 // inactivation of MAPK activity // traceable author statement /// 0008277 // regulation of G-protein coupled receptor protein signaling pathway // traceable author statement /// 0009968 // negative regulation of signal transduction // inferred from electronic annotation	0005624 // membrane fraction // inferred from electronic annotation /// 0005737 // cytoplasm // inferred from sequence or structural similarity /// 0005829 // cytosol // inferred from electronic annotation /// 0005886 // plasma membrane // inferred from sequence or structural similarity	0004871 // signal transducer activity // inferred from electronic annotation /// 0005096 // GTPase activator activity // inferred from sequence or structural similarity /// 0005096 // GTPase activator activity // traceable author statement /// 0005516 // calmodulin binding // traceable author statement	Calcium_regulation_in_cardiac_cells // GenMAPP /// Smooth_muscle_contraction // GenMAPP
1559966_a_at	LOC100192378	2.06551	1.06173	0.514027	2.08743	0.0904263	16.8289	6.00175	6.01158	6.81694	7.31984	1.06173	2.08743	0.0517907	BC037827	hypothetical LOC100192378	LOC100192378	NR_024360	---	---	---	---
202053_s_at	ALDH3A2	2.95875	1.06116	0.358653	2.08661	0	6.97183	8.87606	9.02745	10.0722	9.95367	1.06116	2.08661	0.00810597	L47162	aldehyde dehydrogenase 3 family, member A2	ALDH3A2	NM_000382 /// NM_001031806	0006081 // cellular aldehyde metabolic process // inferred from electronic annotation /// 0006629 // lipid metabolic process // traceable author statement /// 0007417 // central nervous system development // traceable author statement /// 0007422 // peripheral nervous system development // traceable author statement /// 0008152 // metabolic process // inferred from electronic annotation /// 00085…	0005739 // mitochondrion // inferred from electronic annotation /// 0005743 // mitochondrial inner membrane // inferred from electronic annotation /// 0005783 // endoplasmic reticulum // inferred from electronic annotation /// 0005789 // endoplasmic reticulum membrane // inferred from electronic annotation /// 0016020 // membrane // inferred from electronic annotation /// 0016021 // integral to m…	0004028 // 3-chloroallyl aldehyde dehydrogenase activity // traceable author statement /// 0004029 // aldehyde dehydrogenase (NAD) activity // inferred from electronic annotation /// 0004030 // aldehyde dehydrogenase [NAD(P)+] activity // inferred from electronic annotation /// 0016491 // oxidoreductase activity // inferred from electronic annotation	---
203774_at	MTR	2.36068	1.06002	0.449034	2.08497	0.0523603	13.1307	7.77114	8.03016	9.09488	8.82647	1.06003	2.08497	0.0295896	NM_000254	5-methyltetrahydrofolate-homocysteine methyltransferase	MTR	NM_000254	0006479 // protein methylation // inferred from electronic annotation /// 0007399 // nervous system development // traceable author statement /// 0008652 // cellular amino acid biosynthetic process // inferred from electronic annotation /// 0009086 // methionine biosynthetic process // inferred from electronic annotation /// 0042558 // pteridine and derivative metabolic process // inferred from e…	0005622 // intracellular // inferred from electronic annotation /// 0005625 // soluble fraction // inferred from electronic annotation /// 0005737 // cytoplasm // inferred from electronic annotation /// 0005829 // cytosol // not recorded	0005515 // protein binding // inferred from physical interaction /// 0005542 // folic acid binding // inferred from electronic annotation /// 0008168 // methyltransferase activity // inferred from electronic annotation /// 0008270 // zinc ion binding // inferred from electronic annotation /// 0008705 // methionine synthase activity // not recorded /// 0008705 // methionine synthase activity // in…	---
226350_at	CHML	1.85988	1.06002	0.569939	2.08496	0.143798	19.598	8.21465	7.83843	9.3297	8.84342	1.06002	2.08496	0.0747905	AU155565	choroideremia-like (Rab escort protein 2)	CHML	NM_001821	0006886 // intracellular protein transport // inferred from electronic annotation /// 0007601 // visual perception // traceable author statement /// 0043087 // regulation of GTPase activity // inferred from electronic annotation	0005968 // Rab-protein geranylgeranyltransferase complex // inferred from electronic annotation	0004663 // Rab geranylgeranyltransferase activity // inferred from electronic annotation /// 0005096 // GTPase activator activity // inferred from electronic annotation	GPCRDB_Class_A_Rhodopsin-like // GenMAPP
228323_at	CASC5	2.28589	1.05991	0.463675	2.0848	0.0523603	14.0313	7.62721	7.35264	8.69685	8.40282	1.05991	2.0848	0.0341799	BF248364	cancer susceptibility candidate 5	CASC5	NM_144508 /// NM_170589	0001675 // acrosome assembly // non-traceable author statement /// 0007049 // cell cycle // inferred from electronic annotation /// 0007059 // chromosome segregation // inferred from electronic annotation /// 0007067 // mitosis // inferred from electronic annotation /// 0008608 // attachment of spindle microtubules to kinetochore // inferred from direct assay /// 0051301 // cell division // infer…	0000775 // chromosome, centromeric region // inferred from electronic annotation /// 0000776 // kinetochore // inferred from electronic annotation /// 0000777 // condensed chromosome kinetochore // inferred from electronic annotation /// 0001669 // acrosomal vesicle // inferred from direct assay /// 0005634 // nucleus // inferred from direct assay /// 0005634 // nucleus // inferred from electroni…	0005515 // protein binding // inferred from physical interaction	---
228357_at	UNK	3.32821	1.05952	0.318346	2.08424	0	4.12305	7.64016	7.52933	8.63756	8.65097	1.05952	2.08424	0.00276395	BE966979	unkempt homolog (Drosophila)	UNK	NM_001080419	---	---	0003676 // nucleic acid binding // inferred from electronic annotation /// 0005515 // protein binding // inferred from electronic annotation /// 0008270 // zinc ion binding // inferred from electronic annotation /// 0046872 // metal ion binding // inferred from electronic annotation	---
201090_x_at	TUBA1B	3.24771	1.05866	0.325973	2.083	0	4.6823	13.2684	13.3245	14.412	14.2982	1.05866	2.083	0.00357228	NM_006082	tubulin, alpha 1b	TUBA1B	NM_006082	0007017 // microtubule-based process // inferred from electronic annotation /// 0007018 // microtubule-based movement // inferred from electronic annotation /// 0051258 // protein polymerization // inferred from electronic annotation	0005874 // microtubule // inferred from electronic annotation /// 0043234 // protein complex // inferred from electronic annotation	0000166 // nucleotide binding // inferred from electronic annotation /// 0003924 // GTPase activity // inferred from electronic annotation /// 0005198 // structural molecule activity // inferred from electronic annotation /// 0005515 // protein binding // inferred from physical interaction /// 0005525 // GTP binding // inferred from electronic annotation	---
225114_at	AGPS	1.84748	1.05856	0.572975	2.08285	0.143798	19.769	8.41264	8.35651	9.75231	9.13395	1.05856	2.08285	0.0762964	AA127674	alkylglycerone phosphate synthase	AGPS	NM_003659	0006629 // lipid metabolic process // traceable author statement /// 0008610 // lipid biosynthetic process // inferred from direct assay /// 0008610 // lipid biosynthetic process // inferred from electronic annotation /// 0042221 // response to chemical stimulus // inferred from electronic annotation /// 0044255 // cellular lipid metabolic process // not recorded	0005739 // mitochondrion // inferred from electronic annotation /// 0005777 // peroxisome // inferred from direct assay /// 0005777 // peroxisome // inferred from electronic annotation /// 0005777 // peroxisome // traceable author statement /// 0005778 // peroxisomal membrane // inferred from electronic annotation /// 0016020 // membrane // inferred from electronic annotation	0003824 // catalytic activity // inferred from electronic annotation /// 0008609 // alkylglycerone-phosphate synthase activity // inferred from direct assay /// 0008609 // alkylglycerone-phosphate synthase activity // inferred from electronic annotation /// 0016491 // oxidoreductase activity // inferred from electronic annotation /// 0016740 // transferase activity // inferred from electronic ann…	---
217832_at	SYNCRIP	3.34281	1.05852	0.316654	2.08279	0	4.02517	10.0693	10.1702	11.1587	11.1978	1.05851	2.08279	0.00260453	BE672181	synaptotagmin binding, cytoplasmic RNA interacting protein	SYNCRIP	NM_001159673 /// NM_001159674 /// NM_001159675 /// NM_001159676 /// NM_001159677 /// NM_006372	0006396 // RNA processing // traceable author statement /// 0006397 // mRNA processing // inferred from electronic annotation /// 0008380 // RNA splicing // inferred from electronic annotation /// 0008380 // RNA splicing // traceable author statement /// 0044419 // interspecies interaction between organisms // inferred from electronic annotation /// 0070934 // CRD-mediated mRNA stabilization // i…	0005634 // nucleus // inferred from electronic annotation /// 0005634 // nucleus // traceable author statement /// 0005654 // nucleoplasm // inferred from electronic annotation /// 0005681 // spliceosomal complex // inferred from electronic annotation /// 0005737 // cytoplasm // inferred from electronic annotation /// 0005783 // endoplasmic reticulum // inferred from electronic annotation /// 000…	0000166 // nucleotide binding // inferred from electronic annotation /// 0003676 // nucleic acid binding // inferred from electronic annotation /// 0003723 // RNA binding // inferred from electronic annotation /// 0003723 // RNA binding // traceable author statement /// 0005515 // protein binding // inferred from physical interaction /// 0008143 // poly(A) RNA binding // inferred from electronic …	---
204470_at	CXCL1	2.66388	1.05753	0.396991	2.08137	0	9.77234	10.2535	10.4962	11.4904	11.3745	1.05754	2.08137	0.0157848	NM_001511	chemokine (C-X-C motif) ligand 1 (melanoma growth stimulating activity, alpha)	CXCL1	NM_001511	0006935 // chemotaxis // traceable author statement /// 0006954 // inflammatory response // inferred from electronic annotation /// 0006954 // inflammatory response // traceable author statement /// 0006955 // immune response // inferred from electronic annotation /// 0007165 // signal transduction // traceable author statement /// 0007186 // G-protein coupled receptor protein signaling pathway /…	0005576 // extracellular region // not recorded /// 0005576 // extracellular region // inferred from electronic annotation /// 0005615 // extracellular space // inferred from electronic annotation /// 0005615 // extracellular space // traceable author statement	0005102 // receptor binding // traceable author statement /// 0005125 // cytokine activity // inferred from electronic annotation /// 0008009 // chemokine activity // inferred from electronic annotation /// 0008009 // chemokine activity // traceable author statement /// 0008047 // enzyme activator activity // traceable author statement /// 0008083 // growth factor activity // inferred from electr…	---
227486_at	NT5E	2.70533	1.05625	0.390432	2.07952	0	9.35059	9.66362	9.77572	10.8909	10.6609	1.05625	2.07952	0.0143488	AI086864	5'-nucleotidase, ecto (CD73)	NT5E	NM_002526	0006164 // purine nucleotide biosynthetic process // inferred from electronic annotation /// 0006196 // AMP catabolic process // inferred from electronic annotation /// 0006259 // DNA metabolic process // traceable author statement /// 0009166 // nucleotide catabolic process // inferred from electronic annotation /// 0046085 // adenosine metabolic process // inferred from electronic annotation //…	0005624 // membrane fraction // inferred from electronic annotation /// 0005624 // membrane fraction // traceable author statement /// 0005886 // plasma membrane // inferred from electronic annotation /// 0016020 // membrane // inferred from electronic annotation /// 0031225 // anchored to membrane // inferred from electronic annotation	0000166 // nucleotide binding // inferred from electronic annotation /// 0008198 // ferrous iron binding // inferred from electronic annotation /// 0008253 // 5'-nucleotidase activity // inferred from electronic annotation /// 0008253 // 5'-nucleotidase activity // traceable author statement /// 0016787 // hydrolase activity // inferred from electronic annotation /// 0016788 // hydrolase activity…	---
227141_at	TYW3	3.17696	1.05545	0.332221	2.07837	0	5.20174	8.85702	8.73383	9.88348	9.81827	1.05545	2.07837	0.00433192	AW205739	tRNA-yW synthesizing protein 3 homolog (S. cerevisiae)	TYW3	NM_001162916 /// NM_138467 /// NR_027962	0008033 // tRNA processing // inferred from electronic annotation	---	0008168 // methyltransferase activity // inferred from electronic annotation /// 0016740 // transferase activity // inferred from electronic annotation	---
201377_at	UBAP2L	2.43609	1.05514	0.433129	2.07792	0.0523603	12.2508	9.38259	9.58518	10.6763	10.4017	1.05514	2.07792	0.0251598	NM_014847	ubiquitin associated protein 2-like	UBAP2L	NM_001127320 /// NM_014847	---	---	0005515 // protein binding // inferred from physical interaction	---
225464_at	FRMD6	3.4797	1.0536	0.302783	2.0757	0	3.15963	11.4115	11.3571	12.4676	12.4082	1.05359	2.0757	0.00145663	N30138	FERM domain containing 6	FRMD6	NM_001042481 /// NM_152330	---	0005737 // cytoplasm // inferred from electronic annotation /// 0005739 // mitochondrion // inferred from direct assay /// 0005856 // cytoskeleton // inferred from electronic annotation /// 0005886 // plasma membrane // inferred from electronic annotation /// 0016020 // membrane // inferred from electronic annotation	0005488 // binding // inferred from electronic annotation	---
209624_s_at	MCCC2	2.90794	1.05194	0.361747	2.07332	0	7.421	7.7121	7.78105	8.70548	8.89155	1.05194	2.07332	0.0087794	AB050049	methylcrotonoyl-CoA carboxylase 2 (beta)	MCCC2	NM_022132	0006552 // leucine catabolic process // traceable author statement	0005739 // mitochondrion // non-traceable author statement /// 0005739 // mitochondrion // inferred from electronic annotation /// 0005759 // mitochondrial matrix // inferred from electronic annotation	0000166 // nucleotide binding // inferred from electronic annotation /// 0004485 // methylcrotonoyl-CoA carboxylase activity // non-traceable author statement /// 0004485 // methylcrotonoyl-CoA carboxylase activity // inferred from electronic annotation /// 0005524 // ATP binding // inferred from electronic annotation /// 0016874 // ligase activity // inferred from electronic annotation	---
1554408_a_at	TK1	2.92076	1.05139	0.359971	2.07252	0	7.30636	9.66828	9.64108	10.6096	10.8026	1.05139	2.07252	0.0084806	BC007986	thymidine kinase 1, soluble	TK1	NM_003258	0006139 // nucleobase, nucleoside, nucleotide and nucleic acid metabolic process // traceable author statement /// 0006260 // DNA replication // inferred from electronic annotation /// 0051289 // protein homotetramerization // inferred from physical interaction	0005737 // cytoplasm // inferred from electronic annotation	0000166 // nucleotide binding // inferred from electronic annotation /// 0004797 // thymidine kinase activity // inferred from electronic annotation /// 0004797 // thymidine kinase activity // traceable author statement /// 0005524 // ATP binding // inferred from electronic annotation /// 0008270 // zinc ion binding // inferred from direct assay /// 0016301 // kinase activity // inferred from ele…	---
209608_s_at	ACAT2	3.12631	1.0481	0.335252	2.06781	0	5.58979	9.52106	9.59267	10.6683	10.5417	1.0481	2.06781	0.00478006	BC000408	acetyl-CoA acetyltransferase 2	ACAT2	NM_005891	0006629 // lipid metabolic process // inferred by curator /// 0006629 // lipid metabolic process // traceable author statement /// 0008152 // metabolic process // inferred from electronic annotation	0005737 // cytoplasm // inferred from direct assay /// 0005737 // cytoplasm // inferred from electronic annotation /// 0005737 // cytoplasm // traceable author statement	0003824 // catalytic activity // inferred from electronic annotation /// 0003985 // acetyl-CoA C-acetyltransferase activity // inferred from direct assay /// 0003985 // acetyl-CoA C-acetyltransferase activity // inferred from electronic annotation /// 0005515 // protein binding // inferred from physical interaction /// 0008415 // acyltransferase activity // inferred from electronic annotation ///…	---
223487_x_at	GNB4	1.55472	1.04726	0.673596	2.0666	0.213252	23.8935	7.15925	6.34387	7.85141	7.74623	1.04726	2.0666	0.125676	AW504458	guanine nucleotide binding protein (G protein), beta polypeptide 4	GNB4	NM_021629	0007165 // signal transduction // inferred from electronic annotation /// 0009755 // hormone-mediated signaling pathway // not recorded	---	0004871 // signal transducer activity // inferred from electronic annotation	Calcium_regulation_in_cardiac_cells // GenMAPP /// Smooth_muscle_contraction // GenMAPP
204639_at	ADA	3.28926	1.04691	0.318282	2.0661	0	4.38948	6.51922	6.44512	7.48742	7.57074	1.04691	2.0661	0.00282423	NM_000022	adenosine deaminase	ADA	NM_000022	0001666 // response to hypoxia // inferred from direct assay /// 0001701 // in utero embryonic development // inferred from electronic annotation /// 0001829 // trophectodermal cell differentiation // inferred from electronic annotation /// 0001889 // liver development // inferred from electronic annotation /// 0001890 // placenta development // inferred from electronic annotation /// 0002314 // …	0005615 // extracellular space // inferred from electronic annotation /// 0005737 // cytoplasm // inferred from direct assay /// 0005737 // cytoplasm // inferred from electronic annotation /// 0005764 // lysosome // inferred from direct assay /// 0005829 // cytosol // not recorded /// 0005886 // plasma membrane // inferred from direct assay /// 0005886 // plasma membrane // inferred from electron…	0001883 // purine nucleoside binding // inferred from electronic annotation /// 0004000 // adenosine deaminase activity // not recorded /// 0004000 // adenosine deaminase activity // inferred from direct assay /// 0004000 // adenosine deaminase activity // inferred from sequence or structural similarity /// 0004000 // adenosine deaminase activity // inferred from electronic annotation /// 0005515…	---
235439_at	RBMS2	2.16064	1.0454	0.483838	2.06394	0.0523603	15.5968	6.31676	6.74114	7.63722	7.51148	1.0454	2.06394	0.0420126	AL536268	RNA binding motif, single stranded interacting protein 2	RBMS2	NM_002898	0005975 // carbohydrate metabolic process // inferred from electronic annotation /// 0005975 // carbohydrate metabolic process // traceable author statement /// 0006396 // RNA processing // traceable author statement /// 0006486 // protein glycosylation // traceable author statement /// 0042355 // L-fucose catabolic process // non-traceable author statement	0005624 // membrane fraction // traceable author statement /// 0005634 // nucleus // inferred from electronic annotation /// 0005794 // Golgi apparatus // inferred from electronic annotation /// 0005794 // Golgi apparatus // traceable author statement /// 0005887 // integral to plasma membrane // traceable author statement /// 0016020 // membrane // inferred from electronic annotation /// 0016021…	0000166 // nucleotide binding // inferred from electronic annotation /// 0003676 // nucleic acid binding // inferred from electronic annotation /// 0003723 // RNA binding // inferred from electronic annotation /// 0003723 // RNA binding // traceable author statement /// 0008107 // galactoside 2-alpha-L-fucosyltransferase activity // inferred from electronic annotation /// 0008107 // galactoside 2…	---
202697_at	NUDT21	3.32743	1.04535	0.314163	2.06387	0	4.1283	9.75226	9.84036	10.8147	10.8686	1.04535	2.06387	0.00243097	NM_007006	nudix (nucleoside diphosphate linked moiety X)-type motif 21	NUDT21	NM_007006	0006397 // mRNA processing // inferred from direct assay /// 0006397 // mRNA processing // inferred from electronic annotation /// 0008380 // RNA splicing // not recorded	0005634 // nucleus // inferred from electronic annotation /// 0005813 // centrosome // inferred from direct assay /// 0042382 // paraspeckles // inferred from direct assay	0003723 // RNA binding // inferred from direct assay /// 0003723 // RNA binding // inferred from electronic annotation /// 0005515 // protein binding // inferred from physical interaction /// 0016787 // hydrolase activity // inferred from electronic annotation /// 0017091 // AU-rich element binding // inferred from direct assay /// 0042803 // protein homodimerization activity // inferred from phy…	mRNA_processing_Reactome // GenMAPP
201144_s_at	EIF2S1	3.19204	1.04448	0.327212	2.06262	0	5.0888	10.6029	10.5572	11.564	11.685	1.04448	2.06262	0.00381344	NM_004094	eukaryotic translation initiation factor 2, subunit 1 alpha, 35kDa	EIF2S1	NM_004094	0006412 // translation // inferred from electronic annotation /// 0006417 // regulation of translation // inferred from electronic annotation /// 0043558 // regulation of translational initiation in response to stress // inferred from electronic annotation /// 0046777 // protein autophosphorylation // inferred from electronic annotation	0005634 // nucleus // inferred from electronic annotation /// 0005737 // cytoplasm // inferred from electronic annotation /// 0005829 // cytosol // not recorded /// 0005844 // polysome // traceable author statement /// 0005850 // eukaryotic translation initiation factor 2 complex // inferred from electronic annotation /// 0005851 // eukaryotic translation initiation factor 2B complex // inferred …	0003723 // RNA binding // inferred from electronic annotation /// 0003743 // translation initiation factor activity // inferred from direct assay /// 0003743 // translation initiation factor activity // inferred from electronic annotation /// 0003743 // translation initiation factor activity // traceable author statement /// 0005515 // protein binding // inferred from physical interaction /// 000…	Translation_Factors // GenMAPP
201664_at	SMC4	1.85956	1.04283	0.560794	2.06027	0.143798	19.6024	10.7661	10.3032	11.7656	11.3893	1.04283	2.06027	0.072965	AL136877	structural maintenance of chromosomes 4	SMC4	NM_001002800 /// NM_005496	0000070 // mitotic sister chromatid segregation // traceable author statement /// 0007049 // cell cycle // inferred from electronic annotation /// 0007067 // mitosis // inferred from electronic annotation /// 0007076 // mitotic chromosome condensation // inferred from direct assay /// 0030261 // chromosome condensation // inferred from electronic annotation /// 0051276 // chromosome organization …	0000796 // condensin complex // inferred from direct assay /// 0000796 // condensin complex // traceable author statement /// 0005634 // nucleus // traceable author statement /// 0005634 // nucleus // inferred from electronic annotation /// 0005694 // chromosome // inferred from electronic annotation /// 0005737 // cytoplasm // inferred from electronic annotation	0000166 // nucleotide binding // inferred from electronic annotation /// 0005515 // protein binding // inferred from electronic annotation /// 0005524 // ATP binding // traceable author statement /// 0005524 // ATP binding // inferred from electronic annotation /// 0046982 // protein heterodimerization activity // inferred from physical interaction	---
209707_at	PIGK	2.3671	1.04231	0.440331	2.05952	0.0523603	13.0546	8.28406	8.25206	9.48745	9.13329	1.04231	2.05952	0.0278882	AF022913	phosphatidylinositol glycan anchor biosynthesis, class K	PIGK	NM_005482	0006467 // protein thiol-disulfide exchange // traceable author statement /// 0006506 // GPI anchor biosynthetic process // inferred from electronic annotation /// 0006508 // proteolysis // inferred from electronic annotation /// 0016255 // attachment of GPI anchor to protein // not recorded /// 0016255 // attachment of GPI anchor to protein // traceable author statement	0005783 // endoplasmic reticulum // inferred from electronic annotation /// 0005789 // endoplasmic reticulum membrane // inferred from electronic annotation /// 0016020 // membrane // inferred from electronic annotation /// 0016021 // integral to membrane // inferred from electronic annotation /// 0030176 // integral to endoplasmic reticulum membrane // non-traceable author statement /// 0042765 …	0003923 // GPI-anchor transamidase activity // inferred from mutant phenotype /// 0004197 // cysteine-type endopeptidase activity // inferred from electronic annotation /// 0005515 // protein binding // inferred from physical interaction /// 0008233 // peptidase activity // inferred from electronic annotation /// 0008234 // cysteine-type peptidase activity // inferred from electronic annotation /…	---
204146_at	RAD51AP1	1.78088	1.04165	0.58491	2.05858	0.143798	20.6937	9.53745	9.18185	10.6702	10.1324	1.04165	2.05858	0.0839056	BE966146	RAD51 associated protein 1	RAD51AP1	NM_001130862 /// NM_006479	0000724 // double-strand break repair via homologous recombination // non-traceable author statement /// 0006281 // DNA repair // non-traceable author statement /// 0006281 // DNA repair // inferred from electronic annotation /// 0006281 // DNA repair // traceable author statement /// 0006310 // DNA recombination // inferred from electronic annotation /// 0006974 // response to DNA damage stimulu…	0005634 // nucleus // inferred by curator /// 0005634 // nucleus // inferred from electronic annotation /// 0005634 // nucleus // traceable author statement	0003677 // DNA binding // inferred from electronic annotation /// 0003690 // double-stranded DNA binding // inferred from direct assay /// 0003690 // double-stranded DNA binding // traceable author statement /// 0003697 // single-stranded DNA binding // inferred from direct assay /// 0003697 // single-stranded DNA binding // traceable author statement /// 0003723 // RNA binding // inferred from d…	---
1552256_a_at	SCARB1	2.18992	1.04087	0.475301	2.05747	0.0523603	15.2248	8.19707	8.52214	9.53779	9.26317	1.04087	2.05747	0.0393377	NM_005505	scavenger receptor class B, member 1	SCARB1	NM_001082959 /// NM_005505	0001935 // endothelial cell proliferation // inferred from electronic annotation /// 0006702 // androgen biosynthetic process // inferred from electronic annotation /// 0006707 // cholesterol catabolic process // inferred from electronic annotation /// 0006869 // lipid transport // inferred from electronic annotation /// 0006910 // phagocytosis, recognition // inferred from electronic annotation …	0000299 // integral to membrane of membrane fraction // inferred from electronic annotation /// 0005737 // cytoplasm // inferred from electronic annotation /// 0005886 // plasma membrane // not recorded /// 0005886 // plasma membrane // inferred from direct assay /// 0005886 // plasma membrane // inferred from electronic annotation /// 0005887 // integral to plasma membrane // inferred from elect…	0001530 // lipopolysaccharide binding // inferred from direct assay /// 0001786 // phosphatidylserine binding // inferred from sequence or structural similarity /// 0001875 // lipopolysaccharide receptor activity // inferred from direct assay /// 0004872 // receptor activity // inferred from electronic annotation /// 0005215 // transporter activity // traceable author statement /// 0005515 // pro…	Statin_Pathway_PharmGKB // GenMAPP
204900_x_at	SAP30	2.06038	1.04063	0.505066	2.05712	0.0904263	16.8962	8.12951	8.00378	9.34153	8.87303	1.04063	2.05712	0.0502612	NM_003864	Sin3A-associated protein, 30kDa	SAP30	NM_003864	0000122 // negative regulation of transcription from RNA polymerase II promoter // inferred from electronic annotation /// 0006350 // transcription // inferred from electronic annotation /// 0045449 // regulation of transcription // inferred from direct assay /// 0045449 // regulation of transcription // inferred from electronic annotation	0000118 // histone deacetylase complex // inferred from direct assay /// 0005634 // nucleus // inferred from electronic annotation	0003677 // DNA binding // inferred from electronic annotation /// 0003714 // transcription corepressor activity // inferred from direct assay /// 0005515 // protein binding // inferred from physical interaction /// 0005515 // protein binding // inferred from electronic annotation /// 0046872 // metal ion binding // inferred from electronic annotation	---
212141_at	MCM4	2.85062	1.0406	0.365043	2.05708	0	7.94454	9.37401	9.57902	10.5183	10.5159	1.0406	2.05708	0.00956634	AA604621	minichromosome maintenance complex component 4	MCM4	NM_005914 /// NM_182746	0006260 // DNA replication // not recorded /// 0006260 // DNA replication // non-traceable author statement /// 0006260 // DNA replication // inferred from electronic annotation /// 0006268 // DNA unwinding involved in replication // inferred from electronic annotation /// 0006270 // DNA-dependent DNA replication initiation // inferred from electronic annotation /// 0006350 // transcription // in…	0005634 // nucleus // inferred from direct assay /// 0005634 // nucleus // non-traceable author statement /// 0005634 // nucleus // inferred from electronic annotation /// 0005654 // nucleoplasm // not recorded /// 0005730 // nucleolus // inferred from direct assay	0000166 // nucleotide binding // inferred from electronic annotation /// 0003677 // DNA binding // inferred from electronic annotation /// 0003678 // DNA helicase activity // inferred from electronic annotation /// 0003697 // single-stranded DNA binding // inferred from electronic annotation /// 0005515 // protein binding // inferred from physical interaction /// 0005515 // protein binding // inf…	Cell_cycle_KEGG // GenMAPP /// DNA_replication_Reactome // GenMAPP /// G1_to_S_cell_cycle_Reactome // GenMAPP
202503_s_at	KIAA0101	3.46063	1.03958	0.300402	2.05563	0	3.27467	11.6235	11.6564	12.7137	12.6454	1.03958	2.05563	0.00132469	NM_014736	KIAA0101	KIAA0101	NM_001029989 /// NM_014736	---	0005634 // nucleus // inferred from electronic annotation /// 0005739 // mitochondrion // inferred from electronic annotation	---	---
211150_s_at	DLAT	2.38029	1.03928	0.436618	2.0552	0.0523603	12.8991	8.96469	9.1913	10.2494	9.9851	1.03928	2.0552	0.0269315	J03866	dihydrolipoamide S-acetyltransferase	DLAT	NM_001931	0006085 // acetyl-CoA biosynthetic process // non-traceable author statement /// 0006086 // acetyl-CoA biosynthetic process from pyruvate // inferred from electronic annotation /// 0006090 // pyruvate metabolic process // inferred from electronic annotation /// 0006096 // glycolysis // inferred from electronic annotation /// 0008152 // metabolic process // inferred from electronic annotation /// …	0005739 // mitochondrion // inferred from electronic annotation /// 0005759 // mitochondrial matrix // inferred from electronic annotation /// 0005967 // mitochondrial pyruvate dehydrogenase complex // non-traceable author statement /// 0045254 // pyruvate dehydrogenase complex // inferred from electronic annotation	0004742 // dihydrolipoyllysine-residue acetyltransferase activity // non-traceable author statement /// 0004742 // dihydrolipoyllysine-residue acetyltransferase activity // inferred from electronic annotation /// 0005515 // protein binding // inferred from physical interaction /// 0005515 // protein binding // inferred from electronic annotation /// 0008415 // acyltransferase activity // inferred…	Glycolysis_and_Gluconeogenesis // GenMAPP /// Krebs-TCA_Cycle // GenMAPP
46167_at	C1orf175 /// TTC4	3.07646	1.03842	0.337539	2.05398	0	5.98514	8.96918	9.02924	10.1064	9.96889	1.03842	2.05398	0.00517754	W22690	chromosome 1 open reading frame 175 /// tetratricopeptide repeat domain 4	C1orf175 /// TTC4	NM_001039464 /// NM_004623 /// NR_026782	---	0016020 // membrane // inferred from electronic annotation /// 0016021 // integral to membrane // inferred from electronic annotation	0005488 // binding // inferred from electronic annotation	---
242069_at	CBX5	2.66363	1.03822	0.389777	2.0537	0	9.77485	6.63312	6.83948	7.849	7.70005	1.03822	2.0537	0.0146918	BE568225	chromobox homolog 5	CBX5	NM_001127321 /// NM_001127322 /// NM_012117	0006333 // chromatin assembly or disassembly // inferred from electronic annotation /// 0016481 // negative regulation of transcription // inferred from direct assay /// 0045892 // negative regulation of transcription, DNA-dependent // inferred from electronic annotation	0000118 // histone deacetylase complex // inferred from sequence or structural similarity /// 0000118 // histone deacetylase complex // inferred from electronic annotation /// 0000775 // chromosome, centromeric region // inferred from electronic annotation /// 0000776 // kinetochore // inferred from electronic annotation /// 0000785 // chromatin // inferred from electronic annotation /// 0000792 …	0003682 // chromatin binding // inferred from electronic annotation /// 0005515 // protein binding // inferred from physical interaction /// 0005515 // protein binding // inferred from electronic annotation /// 0016564 // transcription repressor activity // inferred from electronic annotation /// 0016565 // general transcriptional repressor activity // inferred from mutant phenotype /// 0019899 /…	---
202539_s_at	HMGCR	2.96211	1.03776	0.350346	2.05304	0	6.94263	8.94349	8.95248	10.0734	9.89804	1.03776	2.05304	0.00708505	AL518627	3-hydroxy-3-methylglutaryl-CoA reductase	HMGCR	NM_000859 /// NM_001130996	0006694 // steroid biosynthetic process // inferred from electronic annotation /// 0006695 // cholesterol biosynthetic process // inferred from electronic annotation /// 0007584 // response to nutrient // inferred from electronic annotation /// 0008299 // isoprenoid biosynthetic process // inferred from electronic annotation /// 0008354 // germ cell migration // traceable author statement /// 000…	0005777 // peroxisome // inferred from electronic annotation /// 0005778 // peroxisomal membrane // inferred from electronic annotation /// 0005783 // endoplasmic reticulum // inferred from electronic annotation /// 0005789 // endoplasmic reticulum membrane // not recorded /// 0005789 // endoplasmic reticulum membrane // inferred from electronic annotation /// 0005789 // endoplasmic reticulum mem…	0004420 // hydroxymethylglutaryl-CoA reductase (NADPH) activity // inferred from electronic annotation /// 0016491 // oxidoreductase activity // inferred from electronic annotation /// 0016616 // oxidoreductase activity, acting on the CH-OH group of donors, NAD or NADP as acceptor // inferred from electronic annotation /// 0042282 // hydroxymethylglutaryl-CoA reductase activity // inferred from e…	Cholesterol_Biosynthesis // GenMAPP /// Statin_Pathway_PharmGKB // GenMAPP
201088_at	KPNA2	2.32231	1.03775	0.44686	2.05302	0.0523603	13.5893	11.2123	11.2103	12.4334	12.0647	1.03775	2.05302	0.0301326	NM_002266	karyopherin alpha 2 (RAG cohort 1, importin alpha 1)	KPNA2	NM_002266	0000018 // regulation of DNA recombination // traceable author statement /// 0000072 // M phase specific microtubule process // traceable author statement /// 0000085 // G2 phase of mitotic cell cycle // traceable author statement /// 0006259 // DNA metabolic process // traceable author statement /// 0006606 // protein import into nucleus // inferred from electronic annotation /// 0006607 // NLS-…	0005634 // nucleus // inferred from electronic annotation /// 0005634 // nucleus // traceable author statement /// 0005643 // nuclear pore // inferred from electronic annotation /// 0005654 // nucleoplasm // traceable author statement /// 0005737 // cytoplasm // inferred from electronic annotation /// 0005737 // cytoplasm // traceable author statement	0005488 // binding // inferred from electronic annotation /// 0005515 // protein binding // inferred from physical interaction /// 0008139 // nuclear localization sequence binding // traceable author statement /// 0008565 // protein transporter activity // inferred from electronic annotation /// 0042826 // histone deacetylase binding // inferred from physical interaction	---
[truncated: 3,014 more rows]

## Sheet: all features
Gene ID	Gene Name	Score(d)	Numerator(r)	Denominator(s+s0)	Fold Change	q-value(%)	localfdr(%)	HEY - 1.oct2011-4points-second.rma-Signal	HEY - 2.oct2011-4points-second.rma-Signal	HEY A8 - 1.oct2011-4points-second.rma-Signal	HEY A8 - 2.oct2011-4points-second.rma-Signal	lograt	FC	t-test	Representative Public ID	Gene Title	Gene Symbol	RefSeq Transcript ID	Gene Ontology Biological Process	Gene Ontology Cellular Component	Gene Ontology Molecular Function	Pathway	EMT	EMTgene	RES	RESgene
[truncated: 3,641 more rows]
