# Supplementary material for: Cell Stiffness Is a Biomarker of the Metastatic Potential of Ovarian Cancer Cells
Source: PLoS One. 2012 Oct 4;7(10):e46609. doi: 10.1371/journal.pone.0046609 (PMC3464294; doi:10.1371/journal.pone.0046609)
Supplement: File S2 — List of proteins topologically relevant to genes up-regulated in HEY A8 cells. Topologically relevant proteins (represented by 1199 official gene symbols) were identified by topological significance analysis (p<0.01). (XLS) [file pone.0046609.s004.xls]

## Sheet: supplemental file 2
ENTREZ_GENE_ID	GENE_SYMBOL	Gene Name
19	ABCA1	ATP-binding cassette, sub-family A (ABC1), member 1
25	ABL1	c-abl oncogene 1, receptor tyrosine kinase
54	acp5	acid phosphatase 5, tartrate resistant
55	acpP	acid phosphatase, prostate
58	ACTA1	actin, alpha 1, skeletal muscle
59	acta2	actin, alpha 2, smooth muscle, aorta
60	ACTB	actin, beta
70	Actc1	actin, alpha, cardiac muscle 1
71	ACTG1	actin, gamma 1
72	Actg2	actin, gamma 2, smooth muscle, enteric
86	actl6a	actin-like 6A
91	ACVR1B	activin A receptor, type IB
93	ACVR2B	activin A receptor, type IIB
94	Acvrl1	activin A receptor type II-like 1
102	ADAM10	ADAM metallopeptidase domain 10
147	adra1b	adrenergic, alpha-1B-, receptor
148	ADRA1A	adrenergic, alpha-1A-, receptor
150	Adra2a	adrenergic, alpha-2A-, receptor
156	ADRBK1	adrenergic, beta, receptor kinase 1
164	Ap1g1	adaptor-related protein complex 1, gamma 1 subunit
176	ACAN	aggrecan
177	AGER	advanced glycosylation end product-specific receptor
185	Agtr1	angiotensin II receptor, type 1
186	Agtr2	angiotensin II receptor, type 2
196	ahr	aryl hydrocarbon receptor
208	akt2	v-akt murine thymoma viral oncogene homolog 2
248	ALPI	alkaline phosphatase, intestinal
259	ambp	alpha-1-microglobulin/bikunin precursor
267	Amfr	autocrine motility factor receptor
273	ampH	amphiphysin
274	bin1	bridging integrator 1
302	ANXA2	annexin A2 pseudogene 3; annexin A2; annexin A2 pseudogene 1
302	ANXA2P1	annexin A2 pseudogene 3; annexin A2; annexin A2 pseudogene 1
302	ANXA2P3	annexin A2 pseudogene 3; annexin A2; annexin A2 pseudogene 1
317	Apaf1	apoptotic peptidase activating factor 1
322	APBB1	amyloid beta (A4) precursor protein-binding, family B, member 1 (Fe65)
324	APC	adenomatous polyposis coli
326	AIRE	autoimmune regulator
328	Apex1	APEX nuclease (multifunctional DNA repair enzyme) 1
330	BIRC3	baculoviral IAP repeat-containing 3
331	XIAP	X-linked inhibitor of apoptosis
332	BIRC5	baculoviral IAP repeat-containing 5
333	Aplp1	amyloid beta (A4) precursor-like protein 1
338	Apob	apolipoprotein B (including Ag(x) antigen)
348	APOE	hypothetical LOC100129500; apolipoprotein E
348	LOC100129500	hypothetical LOC100129500; apolipoprotein E
351	APP	amyloid beta (A4) precursor protein
355	Fas	Fas (TNF receptor superfamily, member 6)
356	FASLG	Fas ligand (TNF superfamily, member 6)
367	Ar	androgen receptor
374	AREG	amphiregulin; amphiregulin B
374	AREGB	amphiregulin; amphiregulin B
375	Arf1	ADP-ribosylation factor 1
382	Arf6	ADP-ribosylation factor 6
388	RHOB	ras homolog gene family, member B
391	RHOG	ras homolog gene family, member G (rho G)
394	ARHGAP5	Rho GTPase activating protein 5
405	ARNT	aryl hydrocarbon receptor nuclear translocator
406	arntl	aryl hydrocarbon receptor nuclear translocator-like
407	Arr3	arrestin 3, retinal (X-arrestin)
408	ARRB1	arrestin, beta 1
409	arrb2	arrestin, beta 2
429	Ascl1	achaete-scute complex homolog 1 (Drosophila)
430	ASCL2	achaete-scute complex homolog 2 (Drosophila)
463	ZFHX3	zinc finger homeobox 3; hypothetical LOC100132068
467	atf3	activating transcription factor 3
472	ATM	similar to Serine-protein kinase ATM (Ataxia telangiectasia mutated) (A-T, mutated); ataxia telangiectasia mutated
472	LOC651610	similar to Serine-protein kinase ATM (Ataxia telangiectasia mutated) (A-T, mutated); ataxia telangiectasia mutated
476	ATP1A1	ATPase, Na+/K+ transporting, alpha 1 polypeptide
481	Atp1b1	ATPase, Na+/K+ transporting, beta 1 polypeptide
545	ATR	ataxia telangiectasia and Rad3 related; similar to ataxia telangiectasia and Rad3 related protein
545	LOC648152	ataxia telangiectasia and Rad3 related; similar to ataxia telangiectasia and Rad3 related protein
545	LOC651921	ataxia telangiectasia and Rad3 related; similar to ataxia telangiectasia and Rad3 related protein
547	KIF1A	kinesin family member 1A
552	AVPR1A	arginine vasopressin receptor 1A
572	Bad	BCL2-associated agonist of cell death
578	Bak1	BCL2-antagonist/killer 1; BCL2-like 7 pseudogene 1
578	BAK1P1	BCL2-antagonist/killer 1; BCL2-like 7 pseudogene 1
581	BAX	BCL2-associated X protein
595	CCND1	cyclin D1
596	BCL2	B-cell CLL/lymphoma 2
598	BCL2L1	BCL2-like 1
602	Bcl3	B-cell CLL/lymphoma 3
604	BCL6	B-cell CLL/lymphoma 6
624	BDKRB2	bradykinin receptor B2
634	CEACAM1	carcinoembryonic antigen-related cell adhesion molecule 1 (biliary glycoprotein)
637	BID	BH3 interacting domain death agonist
639	PRDM1	PR domain containing 1, with ZNF domain
654	BMP6	bone morphogenetic protein 6
657	BMPR1A	bone morphogenetic protein receptor, type IA; similar to ALK-3
657	LOC643778	bone morphogenetic protein receptor, type IA; similar to ALK-3
658	Bmpr1b	bone morphogenetic protein receptor, type IB
660	BMX	BMX non-receptor tyrosine kinase
662	BNIP1	BCL2/adenovirus E1B 19kDa interacting protein 1
663	Bnip2	BCL2/adenovirus E1B 19kDa interacting protein 2
672	BRCA1	breast cancer 1, early onset
685	BTC	betacellulin
699	BUB1	budding uninhibited by benzimidazoles 1 homolog (yeast)
705	bysl	bystin-like
712	C1qa	complement component 1, q subcomponent, A chain
713	C1QB	complement component 1, q subcomponent, B chain
714	C1QC	complement component 1, q subcomponent, C chain
718	C3	similar to Complement C3 precursor; complement component 3; hypothetical protein LOC100133511
718	LOC100133511	similar to Complement C3 precursor; complement component 3; hypothetical protein LOC100133511
718	LOC653879	similar to Complement C3 precursor; complement component 3; hypothetical protein LOC100133511
719	C3AR1	complement component 3a receptor 1
720	C4a	complement component 4A (Rodgers blood group)
721	C4b	complement component 4B (Chido blood group)
722	C4BPA	complement component 4 binding protein, alpha
725	C4BPB	complement component 4 binding protein, beta
774	Cacna1b	calcium channel, voltage-dependent, N type, alpha 1B subunit
811	CALR	calreticulin
820	CAMP	cathelicidin antimicrobial peptide
823	CAPN1	calpain 1, (mu/I) large subunit
832	CAPZB	capping protein (actin filament) muscle Z-line, beta
835	CASP2	caspase 2, apoptosis-related cysteine peptidase
842	Casp9	caspase 9, apoptosis-related cysteine peptidase
843	casp10	caspase 10, apoptosis-related cysteine peptidase
857	cav1	caveolin 1, caveolae protein, 22kDa
859	CAV3	caveolin 3
864	runx3	runt-related transcription factor 3
867	cbl	Cas-Br-M (murine) ecotropic retroviral transforming sequence
868	Cblb	Cas-Br-M (murine) ecotropic retroviral transforming sequence b
887	CCKBR	cholecystokinin B receptor
891	CCNB1	cyclin B1
894	CCND2	cyclin D2
896	CCND3	cyclin D3
923	Cd6	CD6 molecule
925	Cd8a	CD8a molecule
926	CD8B	CD8b molecule
943	TNFRSF8	tumor necrosis factor receptor superfamily, member 8
952	cd38	CD38 molecule
958	CD40	CD40 molecule, TNF receptor superfamily member 5
960	CD44	CD44 molecule (Indian blood group)
967	CD63	CD63 molecule
990	cdc6	cell division cycle 6 homolog (S. cerevisiae)
996	cdc27	cell division cycle 27 homolog (S. cerevisiae)
998	Cdc42	cell division cycle 42 (GTP binding protein, 25kDa); cell division cycle 42 pseudogene 2
998	CDC42P2	cell division cycle 42 (GTP binding protein, 25kDa); cell division cycle 42 pseudogene 2
999	CDH1	cadherin 1, type 1, E-cadherin (epithelial)
1017	Cdk2	cyclin-dependent kinase 2
1019	Cdk4	cyclin-dependent kinase 4
1020	cdk5	cyclin-dependent kinase 5
1024	cdk8	cyclin-dependent kinase 8
1025	CDK9	cyclin-dependent kinase 9
1026	CDKN1A	cyclin-dependent kinase inhibitor 1A (p21, Cip1)
1027	CDKN1B	cyclin-dependent kinase inhibitor 1B (p27, Kip1)
1028	CDKN1C	cyclin-dependent kinase inhibitor 1C (p57, Kip2)
1029	CDKN2A	cyclin-dependent kinase inhibitor 2A (melanoma, p16, inhibits CDK4)
1030	cdkn2b	cyclin-dependent kinase inhibitor 2B (p15, inhibits CDK4)
1031	CDKN2C	cyclin-dependent kinase inhibitor 2C (p18, inhibits CDK4)
1032	CDKN2D	cyclin-dependent kinase inhibitor 2D (p19, inhibits CDK4)
1050	CEBPA	CCAAT/enhancer binding protein (C/EBP), alpha
1051	CEBPB	CCAAT/enhancer binding protein (C/EBP), beta
1053	CEBPE	CCAAT/enhancer binding protein (C/EBP), epsilon
1063	CENPF	centromere protein F, 350/400ka (mitosin)
1072	CFL1	cofilin 1 (non-muscle)
1104	rcc1	regulator of chromosome condensation 1; SNHG3-RCC1 readthrough transcript
1104	SNHG3-RCC1	regulator of chromosome condensation 1; SNHG3-RCC1 readthrough transcript
1111	CHEK1	CHK1 checkpoint homolog (S. pombe)
1131	CHRM3	cholinergic receptor, muscarinic 3
1147	CHUK	conserved helix-loop-helix ubiquitous kinase
1191	clu	clusterin
1208	clpS	colipase, pancreatic
1211	CLTA	clathrin, light chain (Lca)
1212	Cltb	clathrin, light chain (Lcb)
1213	CLTC	clathrin, heavy chain (Hc)
1215	Cma1	chymase 1, mast cell
1230	CCR1	chemokine (C-C motif) receptor 1
1234	CCR5	chemokine (C-C motif) receptor 5
1238	CCBP2	chemokine binding protein 2
1268	cnr1	cannabinoid receptor 1 (brain)
1277	COL1A1	collagen, type I, alpha 1
1280	COL2A1	collagen, type II, alpha 1
1281	COL3A1	collagen, type III, alpha 1
1284	col4a2	collagen, type IV, alpha 2
1285	COL4A3	collagen, type IV, alpha 3 (Goodpasture antigen)
1390	Crem	cAMP responsive element modulator
1392	crh	corticotropin releasing hormone
1394	CRHR1	corticotropin releasing hormone receptor 1
1395	CRHR2	corticotropin releasing hormone receptor 2
1398	crk	v-crk sarcoma virus CT10 oncogene homolog (avian)
1406	CRX	cone-rod homeobox
1410	CRYAB	crystallin, alpha B
1434	CSE1L	CSE1 chromosome segregation 1-like (yeast)
1438	CSF2RA	colony stimulating factor 2 receptor, alpha, low-affinity (granulocyte-macrophage)
1445	CSK	c-src tyrosine kinase
1452	csnk1a1	casein kinase 1, alpha 1
1453	CSNK1D	casein kinase 1, delta
1454	CSNK1E	casein kinase 1, epsilon
1457	Csnk2a1	casein kinase 2, alpha 1 polypeptide pseudogene; casein kinase 2, alpha 1 polypeptide
1457	CSNK2A1P	casein kinase 2, alpha 1 polypeptide pseudogene; casein kinase 2, alpha 1 polypeptide
1459	csnk2a2	casein kinase 2, alpha prime polypeptide
1460	CSNK2B	lymphocyte antigen 6 complex, locus G5B; casein kinase 2, beta polypeptide
1460	LY6G5B	lymphocyte antigen 6 complex, locus G5B; casein kinase 2, beta polypeptide
1462	VCAN	versican
1487	Ctbp1	C-terminal binding protein 1
1488	CTBP2	C-terminal binding protein 2
1493	Ctla4	cytotoxic T-lymphocyte-associated protein 4
1499	CTNNB1	catenin (cadherin-associated protein), beta 1, 88kDa
1508	CTSB	cathepsin B
1512	CTSH	cathepsin H
1513	Ctsk	cathepsin K
1520	CTSS	cathepsin S
1523	CUX1	cut-like homeobox 1
1535	CYBA	cytochrome b-245, alpha polypeptide
1604	Cd55	CD55 molecule, decay accelerating factor for complement (Cromer blood group)
1605	DAG1	dystroglycan 1 (dystrophin-associated glycoprotein 1)
1612	DAPK1	death-associated protein kinase 1
1616	DAXX	death-domain associated protein
1628	dbp	D site of albumin promoter (albumin D-box) binding protein
1630	DCC	deleted in colorectal carcinoma
1639	DCTN1	dynactin 1 (p150, glued homolog, Drosophila)
1643	DDB2	damage-specific DNA binding protein 2, 48kDa
1649	DDIT3	DNA-damage-inducible transcript 3
1655	DDX5	DEAD (Asp-Glu-Ala-Asp) box polypeptide 5
1660	dhx9	DEAH (Asp-Glu-Ala-His) box polypeptide 9
1674	DES	desmin
1728	nqo1	NAD(P)H dehydrogenase, quinone 1
1756	dmd	dystrophin
1785	DNM2	dynamin 2
1788	DNMT3A	DNA (cytosine-5-)-methyltransferase 3 alpha
1793	DOCK1	dedicator of cytokinesis 1
1794	DOCK2	dedicator of cytokinesis 2
1803	DPP4	dipeptidyl-peptidase 4
1813	DRD2	dopamine receptor D2
1814	DRD3	dopamine receptor D3
1820	arid3a	AT rich interactive domain 3A (BRIGHT-like)
1839	HBEGF	heparin-binding EGF-like growth factor
1845	DUSP3	dual specificity phosphatase 3
1855	DVL1	dishevelled, dsh homolog 1 (Drosophila); dishevelled, dsh homolog 1 (Drosophila)-like 1
1855	DVL1L1	dishevelled, dsh homolog 1 (Drosophila); dishevelled, dsh homolog 1 (Drosophila)-like 1
1856	DVL2	dishevelled, dsh homolog 2 (Drosophila)
1857	DVL3	dishevelled, dsh homolog 3 (Drosophila)
1869	E2F1	E2F transcription factor 1
1870	E2f2	E2F transcription factor 2
1871	E2F3	E2F transcription factor 3
1874	e2f4	E2F transcription factor 4, p107/p130-binding
1875	E2f5	E2F transcription factor 5, p130-binding
1876	e2f6	E2F transcription factor 6
1877	E4F1	E4F transcription factor 1
1894	ECT2	epithelial cell transforming sequence 2 oncogene
1901	S1PR1	sphingosine-1-phosphate receptor 1
1908	Edn3	endothelin 3
1909	EDNRA	endothelin receptor type A
1915	EEF1A1	eukaryotic translation elongation factor 1 alpha-like 7; eukaryotic translation elongation factor 1 alpha-like 3; similar to eukaryotic translation elongation factor 1 alpha 1; eukaryotic translation elongation factor 1 alpha 1
1915	EEF1A1P24	eukaryotic translation elongation factor 1 alpha-like 7; eukaryotic translation elongation factor 1 alpha-like 3; similar to eukaryotic translation elongation factor 1 alpha 1; eukaryotic translation elongation factor 1 alpha 1
1915	EEF1A1P5	eukaryotic translation elongation factor 1 alpha-like 7; eukaryotic translation elongation factor 1 alpha-like 3; similar to eukaryotic translation elongation factor 1 alpha 1; eukaryotic translation elongation factor 1 alpha 1
1915	EEF1A1P9	eukaryotic translation elongation factor 1 alpha-like 7; eukaryotic translation elongation factor 1 alpha-like 3; similar to eukaryotic translation elongation factor 1 alpha 1; eukaryotic translation elongation factor 1 alpha 1
1947	efnb1	ephrin-B1
1950	Egf	epidermal growth factor (beta-urogastrone)
1956	egfr	epidermal growth factor receptor (erythroblastic leukemia viral (v-erb-b) oncogene homolog, avian)
1958	Egr1	early growth response 1
1965	EIF2S1	eukaryotic translation initiation factor 2, subunit 1 alpha, 35kDa
1969	EPHA2	EPH receptor A2
1991	ELANE	elastase, neutrophil expressed
1994	ELAVL1	ELAV (embryonic lethal, abnormal vision, Drosophila)-like 1 (Hu antigen R)
1995	ELAVL3	ELAV (embryonic lethal, abnormal vision, Drosophila)-like 3 (Hu antigen C)
2002	elk1	ELK1, member of ETS oncogene family
2004	ELK3	ELK3, ETS-domain protein (SRF accessory protein 2)
2005	ELK4	ELK4, ETS-domain protein (SRF accessory protein 1)
2006	Eln	elastin
2020	En2	engrailed homeobox 2
2023	eno1	enolase 1, (alpha)
2033	EP300	E1A binding protein p300
2034	Epas1	endothelial PAS domain protein 1
2045	EPHA7	EPH receptor A7
2046	Epha8	EPH receptor A8
2064	Erbb2	v-erb-b2 erythroblastic leukemia viral oncogene homolog 2, neuro/glioblastoma derived oncogene homolog (avian)
2065	Erbb3	v-erb-b2 erythroblastic leukemia viral oncogene homolog 3 (avian)
2066	Erbb4	v-erb-a erythroblastic leukemia viral oncogene homolog 4 (avian)
2069	ereg	epiregulin
2074	Ercc6	excision repair cross-complementing rodent repair deficiency, complementation group 6
2099	Esr1	estrogen receptor 1
2113	ETS1	v-ets erythroblastosis virus E26 oncogene homolog 1 (avian)
2114	Ets2	v-ets erythroblastosis virus E26 oncogene homolog 2 (avian)
2117	ETV3	ets variant 3
2146	Ezh2	enhancer of zeste homolog 2 (Drosophila)
2149	F2R	coagulation factor II (thrombin) receptor
2155	F7	coagulation factor VII (serum prothrombin conversion accelerator)
2167	FABP4	fatty acid binding protein 4, adipocyte
2175	FANCA	Fanconi anemia, complementation group A
2185	PTK2B	PTK2B protein tyrosine kinase 2 beta
2213	Fcgr2b	Fc fragment of IgG, low affinity IIb, receptor (CD32); Fc fragment of IgG, low affinity IIc, receptor for (CD32)
2213	FCGR2C	Fc fragment of IgG, low affinity IIb, receptor (CD32); Fc fragment of IgG, low affinity IIc, receptor for (CD32)
2237	FEN1	flap structure-specific endonuclease 1
2243	FGA	fibrinogen alpha chain
2253	FGF8	fibroblast growth factor 8 (androgen-induced)
2290	foxg1	forkhead box G1
2305	FOXM1	forkhead box M1
2308	foxo1	forkhead box O1
2316	FLNA	filamin A, alpha (actin binding protein 280)
2353	FOS	v-fos FBJ murine osteosarcoma viral oncogene homolog
2358	Fpr2	formyl peptide receptor 2
2475	MTOR	mechanistic target of rapamycin (serine/threonine kinase)
2492	fshr	follicle stimulating hormone receptor
2494	NR5A2	nuclear receptor subfamily 5, group A, member 2
2534	FYN	FYN oncogene related to SRC, FGR, YES
2547	LOC389901	X-ray repair complementing defective repair in Chinese hamster cells 6; similar to ATP-dependent DNA helicase II, 70 kDa subunit
2547	XRCC6	X-ray repair complementing defective repair in Chinese hamster cells 6; similar to ATP-dependent DNA helicase II, 70 kDa subunit
2550	GABBR1	gamma-aminobutyric acid (GABA) B receptor, 1
2597	GAPDH	glyceraldehyde-3-phosphate dehydrogenase-like 6; hypothetical protein LOC100133042; glyceraldehyde-3-phosphate dehydrogenase
2597	GAPDHL6	glyceraldehyde-3-phosphate dehydrogenase-like 6; hypothetical protein LOC100133042; glyceraldehyde-3-phosphate dehydrogenase
2597	LOC100133042	glyceraldehyde-3-phosphate dehydrogenase-like 6; hypothetical protein LOC100133042; glyceraldehyde-3-phosphate dehydrogenase
2623	gata1	GATA binding protein 1 (globin transcription factor 1)
2626	GATA4	GATA binding protein 4
2648	KAT2A	K(lysine) acetyltransferase 2A
2660	MSTN	myostatin
2672	GFI1	growth factor independent 1 transcription repressor
2696	GIPR	gastric inhibitory polypeptide receptor
2720	Glb1	galactosidase, beta 1
2767	GNA11	guanine nucleotide binding protein (G protein), alpha 11 (Gq class)
2768	Gna12	guanine nucleotide binding protein (G protein) alpha 12
2770	Gnai1	guanine nucleotide binding protein (G protein), alpha inhibiting activity polypeptide 1
2771	gnai2	guanine nucleotide binding protein (G protein), alpha inhibiting activity polypeptide 2
2773	GNAI3	guanine nucleotide binding protein (G protein), alpha inhibiting activity polypeptide 3
2775	GNAO1	guanine nucleotide binding protein (G protein), alpha activating activity polypeptide O
2776	GNAQ	guanine nucleotide binding protein (G protein), q polypeptide
2778	Gnas	GNAS complex locus
2781	GNAZ	guanine nucleotide binding protein (G protein), alpha z polypeptide
2782	GNB1	guanine nucleotide binding protein (G protein), beta polypeptide 1
2791	GNG11	guanine nucleotide binding protein (G protein), gamma 11
2792	GNGT1	guanine nucleotide binding protein (G protein), gamma transducing activity polypeptide 1
2811	Gp1ba	glycoprotein Ib (platelet), alpha polypeptide
2847	MCHR1	melanin-concentrating hormone receptor 1
2885	GRB2	growth factor receptor-bound protein 2
2890	GRIA1	glutamate receptor, ionotropic, AMPA 1
2902	GRIN1	glutamate receptor, ionotropic, N-methyl D-aspartate 1
2906	GRIN2D	glutamate receptor, ionotropic, N-methyl D-aspartate 2D
2908	NR3C1	nuclear receptor subfamily 3, group C, member 1 (glucocorticoid receptor)
2909	GRLF1	glucocorticoid receptor DNA binding factor 1
2915	Grm5	glutamate receptor, metabotropic 5
2920	CXCL2	chemokine (C-X-C motif) ligand 2
2925	grpr	gastrin-releasing peptide receptor
2931	GSK3A	glycogen synthase kinase 3 alpha
2932	GSK3B	glycogen synthase kinase 3 beta
2934	Gsn	gelsolin (amyloidosis, Finnish type)
2959	Gtf2b	general transcription factor IIB
2965	GTF2H1	general transcription factor IIH, polypeptide 1, 62kDa
3002	GZMB	granzyme B (granzyme 2, cytotoxic T-lymphocyte-associated serine esterase 1)
3006	Hist1h1c	histone cluster 1, H1c
3014	H2afx	H2A histone family, member X
3015	H2AFZ	H2A histone family, member Z
3054	Hcfc1	host cell factor C1 (VP16-accessory protein)
3062	HCRTR2	hypocretin (orexin) receptor 2
3065	Hdac1	histone deacetylase 1
3066	HDAC2	histone deacetylase 2
3084	NRG1	neuregulin 1
3091	HIF1A	hypoxia inducible factor 1, alpha subunit (basic helix-loop-helix transcription factor)
3105	HLA-A	major histocompatibility complex, class I, A
3106	HLA-B	major histocompatibility complex, class I, C; major histocompatibility complex, class I, B
3106	HLA-C	major histocompatibility complex, class I, C; major histocompatibility complex, class I, B
3107	HLA-B	major histocompatibility complex, class I, C; major histocompatibility complex, class I, B
3107	HLA-C	major histocompatibility complex, class I, C; major histocompatibility complex, class I, B
3122	HLA-DRA	major histocompatibility complex, class II, DR alpha
3133	HLA-E	major histocompatibility complex, class I, E
3135	HLA-G	major histocompatibility complex, class I, G
3148	HMGB2	high-mobility group box 2
3150	HMGN1	high-mobility group nucleosome binding domain 1
3172	Hnf4a	hepatocyte nuclear factor 4, alpha
3175	ONECUT1	one cut homeobox 1
3183	Hnrnpc	heterogeneous nuclear ribonucleoprotein C (C1/C2)
3184	HNRNPD	heterogeneous nuclear ribonucleoprotein D (AU-rich element RNA binding protein 1, 37kDa)
3190	Hnrnpk	heterogeneous nuclear ribonucleoprotein K; similar to heterogeneous nuclear ribonucleoprotein K
3190	LOC644063	heterogeneous nuclear ribonucleoprotein K; similar to heterogeneous nuclear ribonucleoprotein K
3192	Hnrnpu	heterogeneous nuclear ribonucleoprotein U (scaffold attachment factor A)
3202	HOXA5	homeobox A5
3205	HOXA9	homeobox A9
3206	HOXA10	homeobox A10
3214	HOXB4	homeobox B4
3265	hras	v-Ha-ras Harvey rat sarcoma viral oncogene homolog
3280	hes1	hairy and enhancer of split 1, (Drosophila)
3297	hsf1	heat shock transcription factor 1
3298	hsf2	heat shock transcription factor 2
3303	HSPA1A	heat shock 70kDa protein 1A; heat shock 70kDa protein 1B
3303	HSPA1B	heat shock 70kDa protein 1A; heat shock 70kDa protein 1B
3304	HSPA1A	heat shock 70kDa protein 1A; heat shock 70kDa protein 1B
3304	HSPA1B	heat shock 70kDa protein 1A; heat shock 70kDa protein 1B
3312	HSPA8	heat shock 70kDa protein 8
3320	HSP90AA1	heat shock protein 90kDa alpha (cytosolic), class A member 2; heat shock protein 90kDa alpha (cytosolic), class A member 1
3320	HSP90AA2	heat shock protein 90kDa alpha (cytosolic), class A member 2; heat shock protein 90kDa alpha (cytosolic), class A member 1
3326	HSP90AB1	heat shock protein 90kDa alpha (cytosolic), class B member 1
3350	HTR1A	5-hydroxytryptamine (serotonin) receptor 1A
3371	TNC	tenascin C
3394	IRF8	interferon regulatory factor 8
3398	ID2	inhibitor of DNA binding 2, dominant negative helix-loop-helix protein
3426	Cfi	complement factor I
3454	IFNAR1	interferon (alpha, beta and omega) receptor 1
3455	IFNAR2	interferon (alpha, beta and omega) receptor 2
3456	IFNB1	interferon, beta 1, fibroblast
3479	Igf1	insulin-like growth factor 1 (somatomedin C)
3480	IGF1R	insulin-like growth factor 1 receptor
3481	IGF2	insulin-like growth factor 2 (somatomedin A); insulin; INS-IGF2 readthrough transcript
3481	INS	insulin-like growth factor 2 (somatomedin A); insulin; INS-IGF2 readthrough transcript
3481	INS-IGF2	insulin-like growth factor 2 (somatomedin A); insulin; INS-IGF2 readthrough transcript
3482	Igf2r	insulin-like growth factor 2 receptor
3484	IGFBP1	insulin-like growth factor binding protein 1
3488	IGFBP5	insulin-like growth factor binding protein 5
3516	Rbpj	recombination signal binding protein for immunoglobulin kappa J region
3554	Il1r1	interleukin 1 receptor, type I
3561	il2rg	interleukin 2 receptor, gamma (severe combined immunodeficiency)
3565	IL4	interleukin 4
3566	IL4R	interleukin 4 receptor
3570	il6r	interleukin 6 receptor
3572	IL6ST	interleukin 6 signal transducer (gp130, oncostatin M receptor)
3576	IL8	interleukin 8
3577	Cxcr1	interleukin 8 receptor, alpha
3579	CXCR2	interleukin 8 receptor, beta
3588	Il10rb	interleukin 10 receptor, beta
3596	IL13	interleukin 13
3597	IL13RA1	interleukin 13 receptor, alpha 1
3606	IL18	interleukin 18 (interferon-gamma-inducing factor)
3611	ILK	integrin-linked kinase
3624	INHBA	inhibin, beta A
3630	IGF2	insulin-like growth factor 2 (somatomedin A); insulin; INS-IGF2 readthrough transcript
3630	INS	insulin-like growth factor 2 (somatomedin A); insulin; INS-IGF2 readthrough transcript
3630	INS-IGF2	insulin-like growth factor 2 (somatomedin A); insulin; INS-IGF2 readthrough transcript
3636	INPPL1	inositol polyphosphate phosphatase-like 1
3643	INSR	insulin receptor
3645	INSRR	insulin receptor-related receptor
3654	Irak1	interleukin-1 receptor-associated kinase 1
3655	itga6	integrin, alpha 6
3659	Irf1	interferon regulatory factor 1
3661	IRF3	interferon regulatory factor 3
3662	IRF4	interferon regulatory factor 4
3663	IRF5	interferon regulatory factor 5
3667	IRS1	insulin receptor substrate 1
3672	ITGA1	integrin, alpha 1
3673	ITGA2	integrin, alpha 2 (CD49B, alpha 2 subunit of VLA-2 receptor)
3675	ITGA3	integrin, alpha 3 (antigen CD49C, alpha 3 subunit of VLA-3 receptor)
3678	ITGA5	integrin, alpha 5 (fibronectin receptor, alpha polypeptide)
3680	ITGA9	integrin, alpha 9
3685	Itgav	integrin, alpha V (vitronectin receptor, alpha polypeptide, antigen CD51)
3687	Itgax	integrin, alpha X (complement component 3 receptor 4 subunit)
3688	Itgb1	integrin, beta 1 (fibronectin receptor, beta polypeptide, antigen CD29 includes MDF2, MSK12)
3689	ITGB2	integrin, beta 2 (complement component 3 receptor 3 and 4 subunit)
3690	ITGB3	integrin, beta 3 (platelet glycoprotein IIIa, antigen CD61)
3691	ITGB4	integrin, beta 4
3693	Itgb5	integrin, beta 5
3702	ITK	IL2-inducible T-cell kinase
3716	JAK1	Janus kinase 1
3717	Jak2	Janus kinase 2
3720	jarid2	jumonji, AT rich interactive domain 2
3725	Jun	jun oncogene
3728	JUP	junction plakoglobin
3757	kcnh2	potassium voltage-gated channel, subfamily H (eag-related), member 2
3778	KCNMA1	potassium large conductance calcium-activated channel, subfamily M, alpha member 1
3791	KDR	kinase insert domain receptor (a type III receptor tyrosine kinase)
3802	KIR2DL1	killer cell immunoglobulin-like receptor, two domains, long cytoplasmic tail, 2; killer cell immunoglobulin-like receptor, two domains, long cytoplasmic tail, 1; killer-cell Ig-like receptor; killer cell immunoglobulin-like receptor, three domains, pseudogene 1
3802	KIR2DL2	killer cell immunoglobulin-like receptor, two domains, long cytoplasmic tail, 2; killer cell immunoglobulin-like receptor, two domains, long cytoplasmic tail, 1; killer-cell Ig-like receptor; killer cell immunoglobulin-like receptor, three domains, pseudogene 1
3802	KIR3DP1	killer cell immunoglobulin-like receptor, two domains, long cytoplasmic tail, 2; killer cell immunoglobulin-like receptor, two domains, long cytoplasmic tail, 1; killer-cell Ig-like receptor; killer cell immunoglobulin-like receptor, three domains, pseudogene 1
3803	KIR2DL1	killer cell immunoglobulin-like receptor, two domains, long cytoplasmic tail, 2; killer cell immunoglobulin-like receptor, two domains, long cytoplasmic tail, 1; killer-cell Ig-like receptor; killer cell immunoglobulin-like receptor, three domains, pseudogene 1
3803	KIR2DL2	killer cell immunoglobulin-like receptor, two domains, long cytoplasmic tail, 2; killer cell immunoglobulin-like receptor, two domains, long cytoplasmic tail, 1; killer-cell Ig-like receptor; killer cell immunoglobulin-like receptor, three domains, pseudogene 1
3803	KIR3DP1	killer cell immunoglobulin-like receptor, two domains, long cytoplasmic tail, 2; killer cell immunoglobulin-like receptor, two domains, long cytoplasmic tail, 1; killer-cell Ig-like receptor; killer cell immunoglobulin-like receptor, three domains, pseudogene 1
3804	KIR2DL3	killer cell immunoglobulin-like receptor, two domains, long cytoplasmic tail, 3
3805	KIR2DL4	killer cell immunoglobulin-like receptor, two domains, long cytoplasmic tail, 4
3811	Kir3dl1	killer cell immunoglobulin-like receptor, three domains, short cytoplasmic tail, 1; killer cell immunoglobulin-like receptor, three domains, long cytoplasmic tail, 1
3811	KIR3DS1	killer cell immunoglobulin-like receptor, three domains, short cytoplasmic tail, 1; killer cell immunoglobulin-like receptor, three domains, long cytoplasmic tail, 1
3815	KIT	similar to Mast/stem cell growth factor receptor precursor (SCFR) (Proto-oncogene tyrosine-protein kinase Kit) (c-kit) (CD117 antigen); v-kit Hardy-Zuckerman 4 feline sarcoma viral oncogene homolog
3815	LOC652799	similar to Mast/stem cell growth factor receptor precursor (SCFR) (Proto-oncogene tyrosine-protein kinase Kit) (c-kit) (CD117 antigen); v-kit Hardy-Zuckerman 4 feline sarcoma viral oncogene homolog
3815	LOC653882	similar to Mast/stem cell growth factor receptor precursor (SCFR) (Proto-oncogene tyrosine-protein kinase Kit) (c-kit) (CD117 antigen); v-kit Hardy-Zuckerman 4 feline sarcoma viral oncogene homolog
3818	KLKB1	kallikrein B, plasma (Fletcher factor) 1
3821	Klrc1	killer cell lectin-like receptor subfamily C, member 1
3822	KLRC2	killer cell lectin-like receptor subfamily C, member 2
3824	KLRD1	killer cell lectin-like receptor subfamily D, member 1
3838	KPNA2	karyopherin alpha 2 (RAG cohort 1, importin alpha 1); karyopherin alpha-2 subunit like
3897	L1cam	L1 cell adhesion molecule
3903	Lair1	leukocyte-associated immunoglobulin-like receptor 1
3909	LAMA3	laminin, alpha 3
3911	LAMA5	laminin, alpha 5
3914	Lamb3	laminin, beta 3
3918	LAMC2	laminin, gamma 2
3932	LCK	lymphocyte-specific protein tyrosine kinase
3937	lcp2	lymphocyte cytosolic protein 2 (SH2 domain containing leukocyte protein of 76kDa)
3949	Ldlr	low density lipoprotein receptor
3952	LEP	leptin
3953	LEPR	leptin receptor
4000	lmna	lamin A/C
4040	LRP6	low density lipoprotein receptor-related protein 6
4041	LRP5	low density lipoprotein receptor-related protein 5
4046	Lsp1	lymphocyte-specific protein 1
4067	LYN	v-yes-1 Yamaguchi sarcoma viral related oncogene homolog
4076	Caprin1	cell cycle associated protein 1
4084	MXD1	MAX dimerization protein 1
4086	SMAD1	SMAD family member 1
4087	SMAD2	SMAD family member 2
4088	SMAD3	SMAD family member 3
4089	smad4	SMAD family member 4
4101	Magea2	melanoma antigen family A, 2; melanoma antigen family A, 2B
4101	MAGEA2B	melanoma antigen family A, 2; melanoma antigen family A, 2B
4131	MAP1B	microtubule-associated protein 1B
4137	mapt	microtubule-associated protein tau
4149	MAX	MYC associated factor X
4150	MAZ	MYC-associated zinc finger protein (purine-binding transcription factor)
4160	MC4R	melanocortin 4 receptor
4168	MCF2	MCF.2 cell line derived transforming sequence
4193	mdm2	Mdm2 p53 binding protein homolog (mouse)
4194	MDM4	Mdm4 p53 binding protein homolog (mouse)
4210	MEFV	Mediterranean fever
4215	MAP3K3	mitogen-activated protein kinase kinase kinase 3
4217	MAP3K5	mitogen-activated protein kinase kinase kinase 5
4224	Mep1a	meprin A, alpha (PABA peptide hydrolase)
4225	mep1b	meprin A, beta
4255	mgmt	O-6-methylguanine-DNA methyltransferase
4276	micA	MHC class I polypeptide-related sequence A
4282	MIF	macrophage migration inhibitory factor (glycosylation-inhibiting factor)
4296	Map3k11	mitogen-activated protein kinase kinase kinase 11
4297	mll	myeloid/lymphoid or mixed-lineage leukemia (trithorax homolog, Drosophila)
4314	MMP3	matrix metallopeptidase 3 (stromelysin 1, progelatinase)
4316	mmp7	matrix metallopeptidase 7 (matrilysin, uterine)
4317	MMP8	matrix metallopeptidase 8 (neutrophil collagenase)
4320	MMP11	matrix metallopeptidase 11 (stromelysin 3)
4325	mmp16	matrix metallopeptidase 16 (membrane-inserted)
4327	MMP19	matrix metallopeptidase 19
4332	MNDA	myeloid cell nuclear differentiation antigen
4342	mos	v-mos Moloney murine sarcoma viral oncogene homolog
4440	MSI1	musashi homolog 1 (Drosophila)
4487	Msx1	msh homeobox 1
4488	MSX2	msh homeobox 2
4582	MUC1	mucin 1, cell surface associated
4601	MXI1	MAX interactor 1
4602	myb	v-myb myeloblastosis viral oncogene homolog (avian)
4609	MYC	v-myc myelocytomatosis viral oncogene homolog (avian)
4613	MYCN	v-myc myelocytomatosis viral related oncogene, neuroblastoma derived (avian)
4615	MYD88	myeloid differentiation primary response gene (88)
4624	Myh6	myosin, heavy chain 6, cardiac muscle, alpha
4644	MYO5A	myosin VA (heavy chain 12, myoxin)
4645	LOC392335	similar to acetyl-Coenzyme A acyltransferase 2 (mitochondrial 3-oxoacyl-Coenzyme A thiolase); similar to KIAA1119 protein; myosin VB
4645	LOC441420	similar to acetyl-Coenzyme A acyltransferase 2 (mitochondrial 3-oxoacyl-Coenzyme A thiolase); similar to KIAA1119 protein; myosin VB
4645	MYO5B	similar to acetyl-Coenzyme A acyltransferase 2 (mitochondrial 3-oxoacyl-Coenzyme A thiolase); similar to KIAA1119 protein; myosin VB
4656	MYOG	myogenin (myogenic factor 4)
4683	NBN	nibrin
4688	Ncf2	neutrophil cytosolic factor 2
4689	Ncf4	neutrophil cytosolic factor 4, 40kDa
4692	NDN	necdin homolog (mouse)
4703	NEB	nebulin
4738	LOC100128775	neural precursor cell expressed, developmentally down-regulated 8; similar to neural precursor cell expressed, developmentally down-regulated gene 8
4738	nedd8	neural precursor cell expressed, developmentally down-regulated 8; similar to neural precursor cell expressed, developmentally down-regulated gene 8
4747	NEFL	neurofilament, light polypeptide
4763	NF1	neurofibromin 1
4772	nfatc1	nuclear factor of activated T-cells, cytoplasmic, calcineurin-dependent 1
4776	NFATC4	nuclear factor of activated T-cells, cytoplasmic, calcineurin-dependent 4
4782	NFIC	nuclear factor I/C (CCAAT-binding transcription factor)
4790	NFKB1	nuclear factor of kappa light polypeptide gene enhancer in B-cells 1
4791	NFKB2	nuclear factor of kappa light polypeptide gene enhancer in B-cells 2 (p49/p100)
4792	NFKBIA	nuclear factor of kappa light polypeptide gene enhancer in B-cells inhibitor, alpha
4801	NFYB	nuclear transcription factor Y, beta
4808	Nhlh2	nescient helix loop helix 2
4824	NKX3-1	NK3 homeobox 1
4829	Nmbr	neuromedin B receptor
4830	Nme1	non-metastatic cells 1, protein (NM23A) expressed in; NME1-NME2 readthrough transcript; non-metastatic cells 2, protein (NM23B) expressed in
4830	NME1-NME2	non-metastatic cells 1, protein (NM23A) expressed in; NME1-NME2 readthrough transcript; non-metastatic cells 2, protein (NM23B) expressed in
4830	NME2	non-metastatic cells 1, protein (NM23A) expressed in; NME1-NME2 readthrough transcript; non-metastatic cells 2, protein (NM23B) expressed in
4831	Nme1	non-metastatic cells 1, protein (NM23A) expressed in; NME1-NME2 readthrough transcript; non-metastatic cells 2, protein (NM23B) expressed in
4831	NME1-NME2	non-metastatic cells 1, protein (NM23A) expressed in; NME1-NME2 readthrough transcript; non-metastatic cells 2, protein (NM23B) expressed in
4831	NME2	non-metastatic cells 1, protein (NM23A) expressed in; NME1-NME2 readthrough transcript; non-metastatic cells 2, protein (NM23B) expressed in
4835	NQO2	NAD(P)H dehydrogenase, quinone 2
4842	NOS1	nitric oxide synthase 1 (neuronal)
4843	NOS2	nitric oxide synthase 2, inducible
4851	notch1	Notch homolog 1, translocation-associated (Drosophila)
4852	NPY	neuropeptide Y
4854	NOTCH3	Notch homolog 3 (Drosophila)
4855	NOTCH4	Notch homolog 4 (Drosophila)
4863	NPAT	nuclear protein, ataxia-telangiectasia locus
4904	ybx1	Y box binding protein 1
4905	Nsf	N-ethylmaleimide-sensitive factor
4914	NTRK1	neurotrophic tyrosine kinase, receptor, type 1
4915	NTRK2	neurotrophic tyrosine kinase, receptor, type 2
4923	Ntsr1	neurotensin receptor 1 (high affinity)
4929	NR4A2	nuclear receptor subfamily 4, group A, member 2
4938	OAS1	2',5'-oligoadenylate synthetase 1, 40/46kDa
4946	oaz1	ornithine decarboxylase antizyme 1
4982	tnfrsf11b	tumor necrosis factor receptor superfamily, member 11b
4987	OPRL1	opiate receptor-like 1
4988	OPRM1	opioid receptor, mu 1
5020	OXT	oxytocin, prepropeptide
5021	Oxtr	oxytocin receptor
5036	PA2G4	proliferation-associated 2G4, 38kDa; proliferation-associated 2G4 pseudogene 4
5036	PA2G4P4	proliferation-associated 2G4, 38kDa; proliferation-associated 2G4 pseudogene 4
5052	PRDX1	peroxiredoxin 1
5062	Pak2	p21 protein (Cdc42/Rac)-activated kinase 2
5071	park2	Parkinson disease (autosomal recessive, juvenile) 2, parkin
5077	PAX3	paired box 3
5078	PAX4	paired box 4
5080	Pax6	paired box 6
5093	Pcbp1	poly(rC) binding protein 1
5094	PCBP2	poly(rC) binding protein 2
5126	Pcsk2	proprotein convertase subtilisin/kexin type 2
5133	Pdcd1	programmed cell death 1
5134	pdcd2	programmed cell death 2
5155	Pdgfb	platelet-derived growth factor beta polypeptide (simian sarcoma viral (v-sis) oncogene homolog)
5159	Pdgfrb	platelet-derived growth factor receptor, beta polypeptide
5173	Pdyn	prodynorphin
5187	Per1	period homolog 1 (Drosophila)
5204	PFDN5	prefoldin subunit 5
5245	Phb	prohibitin
5266	PI3	peptidase inhibitor 3, skin-derived
5290	PIK3CA	phosphoinositide-3-kinase, catalytic, alpha polypeptide
5291	Pik3cb	phosphoinositide-3-kinase, catalytic, beta polypeptide
5292	Pim1	pim-1 oncogene
5293	PIK3CD	phosphoinositide-3-kinase, catalytic, delta polypeptide
5295	Pik3r1	phosphoinositide-3-kinase, regulatory subunit 1 (alpha)
5296	PIK3R2	phosphoinositide-3-kinase, regulatory subunit 2 (beta)
5298	PI4KB	phosphatidylinositol 4-kinase, catalytic, beta
5307	pitX1	paired-like homeodomain 1
5308	pitx2	paired-like homeodomain 2
5311	Pkd2	polycystic kidney disease 2 (autosomal dominant)
5325	PLAGL1	pleiomorphic adenoma gene-like 1
5327	PLAT	plasminogen activator, tissue
5328	PLAU	plasminogen activator, urokinase
5340	plg	plasminogen
5345	SERPINF2	serpin peptidase inhibitor, clade F (alpha-2 antiplasmin, pigment epithelium derived factor), member 2
5347	PLK1	polo-like kinase 1 (Drosophila)
5361	PLXNA1	plexin A1
5364	PLXNB1	plexin B1
5371	LOC652346	promyelocytic leukemia; similar to promyelocytic leukemia protein isoform 1
5371	PML	promyelocytic leukemia; similar to promyelocytic leukemia protein isoform 1
5430	POLR2A	polymerase (RNA) II (DNA directed) polypeptide A, 220kDa
5451	pou2f1	POU class 2 homeobox 1
5452	Pou2f2	POU class 2 homeobox 2
5457	POU4F1	POU class 4 homeobox 1
5465	PPARA	peroxisome proliferator-activated receptor alpha
5468	PPARG	peroxisome proliferator-activated receptor gamma
5494	PPM1A	protein phosphatase 1A (formerly 2C), magnesium-dependent, alpha isoform
5499	Ppp1ca	protein phosphatase 1, catalytic subunit, alpha isoform
5500	PPP1CB	protein phosphatase 1, catalytic subunit, beta isoform; speedy homolog A (Xenopus laevis)
5500	SPDYA	protein phosphatase 1, catalytic subunit, beta isoform; speedy homolog A (Xenopus laevis)
5501	Ppp1cc	protein phosphatase 1, catalytic subunit, gamma isoform
5515	PPP2CA	protein phosphatase 2 (formerly 2A), catalytic subunit, alpha isoform
5516	PPP2CB	protein phosphatase 2 (formerly 2A), catalytic subunit, beta isoform
5518	PPP2R1A	protein phosphatase 2 (formerly 2A), regulatory subunit A, alpha isoform
5525	PPP2R5A	protein phosphatase 2, regulatory subunit B', alpha isoform
5534	Ppp3r1	protein phosphatase 3 (formerly 2B), regulatory subunit B, alpha isoform
5535	PPP3R2	protein phosphatase 3 (formerly 2B), regulatory subunit B, beta isoform
5562	PRKAA1	protein kinase, AMP-activated, alpha 1 catalytic subunit
5563	prkaa2	protein kinase, AMP-activated, alpha 2 catalytic subunit
5566	PRKACA	protein kinase, cAMP-dependent, catalytic, alpha
5576	PRKAR2A	protein kinase, cAMP-dependent, regulatory, type II, alpha
5579	PRKCB	protein kinase C, beta
5580	PRKCD	protein kinase C, delta
5584	PRKCI	protein kinase C, iota
5585	PKN1	protein kinase N1
5587	PRKD1	protein kinase D1
5588	prkcq	protein kinase C, theta
5594	MAPK1	mitogen-activated protein kinase 1
5595	LOC100271831	hypothetical LOC100271831; mitogen-activated protein kinase 3
5595	MAPK3	hypothetical LOC100271831; mitogen-activated protein kinase 3
5598	Mapk7	mitogen-activated protein kinase 7
5599	mapk8	mitogen-activated protein kinase 8
5601	Mapk9	mitogen-activated protein kinase 9
5602	MAPK10	mitogen-activated protein kinase 10
5603	MAPK13	mitogen-activated protein kinase 13
5605	LOC407835	mitogen-activated protein kinase kinase 2 pseudogene; mitogen-activated protein kinase kinase 2
5605	Map2k2	mitogen-activated protein kinase kinase 2 pseudogene; mitogen-activated protein kinase kinase 2
5607	Map2k5	mitogen-activated protein kinase kinase 5
5610	EIF2AK2	eukaryotic translation initiation factor 2-alpha kinase 2
5611	DNAJC3	DnaJ (Hsp40) homolog, subfamily C, member 3
5618	PRLR	prolactin receptor
5644	PRSS1	protease, serine, 1 (trypsin 1); trypsinogen C
5644	Try6	protease, serine, 1 (trypsin 1); trypsinogen C
5645	prss2	protease, serine, 2 (trypsin 2)
5646	prss3	protease, serine, 3
5648	masp1	mannan-binding lectin serine peptidase 1 (C4/C2 activating component of Ra-reactive factor)
5650	KLK7	kallikrein-related peptidase 7
5657	PRTN3	proteinase 3
5688	PSMA7	proteasome (prosome, macropain) subunit, alpha type, 7
5702	psmc3	proteasome (prosome, macropain) 26S subunit, ATPase, 3
5727	ptch1	patched homolog 1 (Drosophila)
5728	pten	phosphatase and tensin homolog; phosphatase and tensin homolog pseudogene 1
5728	PTENP1	phosphatase and tensin homolog; phosphatase and tensin homolog pseudogene 1
5743	PTGS2	prostaglandin-endoperoxide synthase 2 (prostaglandin G/H synthase and cyclooxygenase)
5747	PTK2	PTK2 protein tyrosine kinase 2
5757	LOC441454	hypothetical LOC728026; prothymosin, alpha; hypothetical gene supported by BC013859; prothymosin, alpha pseudogene 4 (gene sequence 112)
5757	LOC728026	hypothetical LOC728026; prothymosin, alpha; hypothetical gene supported by BC013859; prothymosin, alpha pseudogene 4 (gene sequence 112)
5757	PTMA	hypothetical LOC728026; prothymosin, alpha; hypothetical gene supported by BC013859; prothymosin, alpha pseudogene 4 (gene sequence 112)
5757	PTMAP4	hypothetical LOC728026; prothymosin, alpha; hypothetical gene supported by BC013859; prothymosin, alpha pseudogene 4 (gene sequence 112)
5771	PTPN2	protein tyrosine phosphatase, non-receptor type 2
5777	PTPN6	protein tyrosine phosphatase, non-receptor type 6
5781	LOC344593	protein tyrosine phosphatase, non-receptor type 11; similar to protein tyrosine phosphatase, non-receptor type 11
5781	LOC442113	protein tyrosine phosphatase, non-receptor type 11; similar to protein tyrosine phosphatase, non-receptor type 11
5781	PTPN11	protein tyrosine phosphatase, non-receptor type 11; similar to protein tyrosine phosphatase, non-receptor type 11
5783	PTPN13	protein tyrosine phosphatase, non-receptor type 13 (APO-1/CD95 (Fas)-associated phosphatase)
5791	PTPRE	protein tyrosine phosphatase, receptor type, E
5792	ptprf	protein tyrosine phosphatase, receptor type, F
5796	PTPRK	protein tyrosine phosphatase, receptor type, K
5813	purA	purine-rich element binding protein A
5829	PXN	paxillin
5861	RAB1A	RAB1A, member RAS oncogene family
5862	RAB2A	RAB2A, member RAS oncogene family
5868	rab5a	RAB5A, member RAS oncogene family
5872	LOC100131294	RAB13, member RAS oncogene family; similar to hCG24991
5872	RAB13	RAB13, member RAS oncogene family; similar to hCG24991
5879	rac1	ras-related C3 botulinum toxin substrate 1 (rho family, small GTP binding protein Rac1)
5885	RAD21	RAD21 homolog (S. pombe)
5894	RAF1	v-raf-1 murine leukemia viral oncogene homolog 1
5896	RAG1	recombination activating gene 1
5900	RALGDS	ral guanine nucleotide dissociation stimulator
5901	Ran	RAN, member RAS oncogene family
5905	rangap1	Ran GTPase activating protein 1
5906	RAP1A	RAP1A, member of RAS oncogene family
5910	Rap1gds1	RAP1, GTP-GDP dissociation stimulator 1
5923	RASGRF1	Ras protein-specific guanine nucleotide-releasing factor 1
5924	Rasgrf2	Ras protein-specific guanine nucleotide-releasing factor 2
5925	RB1	retinoblastoma 1
5926	ARID4A	AT rich interactive domain 4A (RBP1-like)
5933	Rbl1	retinoblastoma-like 1 (p107)
5934	RBL2	retinoblastoma-like 2 (p130)
5956	OPN1LW	opsin 1 (cone pigments), long-wave-sensitive
5962	rdx	radixin
5966	rel	v-rel reticuloendotheliosis viral oncogene homolog (avian)
5970	relA	v-rel reticuloendotheliosis viral oncogene homolog A (avian)
5971	relB	v-rel reticuloendotheliosis viral oncogene homolog B
5972	REN	renin
5979	RET	ret proto-oncogene
5987	TRIM27	tripartite motif-containing 27
6046	BRD2	bromodomain containing 2
6091	LOC642132	roundabout, axon guidance receptor, homolog 1 (Drosophila); similar to roundabout 1 isoform b
6091	ROBO1	roundabout, axon guidance receptor, homolog 1 (Drosophila); similar to roundabout 1 isoform b
6093	ROCK1	similar to Rho-associated, coiled-coil containing protein kinase 1; Rho-associated, coiled-coil containing protein kinase 1
6093	ROCK1P1	similar to Rho-associated, coiled-coil containing protein kinase 1; Rho-associated, coiled-coil containing protein kinase 1
6096	RORB	RAR-related orphan receptor B
6097	Rorc	RAR-related orphan receptor C
6125	rpl5	ribosomal protein L5 pseudogene 34; ribosomal protein L5 pseudogene 1; ribosomal protein L5
6125	RPL5P1	ribosomal protein L5 pseudogene 34; ribosomal protein L5 pseudogene 1; ribosomal protein L5
6125	RPL5P34	ribosomal protein L5 pseudogene 34; ribosomal protein L5 pseudogene 1; ribosomal protein L5
6135	rpl11	ribosomal protein L11
6184	RPN1	ribophorin I
6237	Rras	related RAS viral (r-ras) oncogene homolog
6249	CLIP1	CAP-GLY domain containing linker protein 1
6256	RXRA	retinoid X receptor, alpha
6275	S100a4	S100 calcium binding protein A4
6279	S100A8	S100 calcium binding protein A8
6280	S100A9	S100 calcium binding protein A9
6285	S100B	S100 calcium binding protein B
6303	Sat1	spermidine/spermine N1-acetyltransferase 1
6304	Satb1	SATB homeobox 1
6310	ATXN1	ataxin 1
6347	Ccl2	chemokine (C-C motif) ligand 2
6348	CCL3	chemokine (C-C motif) ligand 3
6349	CCL3L1	chemokine (C-C motif) ligand 3-like 3; chemokine (C-C motif) ligand 3-like 1
6349	CCL3L3	chemokine (C-C motif) ligand 3-like 3; chemokine (C-C motif) ligand 3-like 1
6352	CCL5	chemokine (C-C motif) ligand 5
6357	CCL13	chemokine (C-C motif) ligand 13
6358	CCL14	chemokine (C-C motif) ligand 14; chemokine (C-C motif) ligand 15
6358	CCL15	chemokine (C-C motif) ligand 14; chemokine (C-C motif) ligand 15
6367	CCL22	chemokine (C-C motif) ligand 22
6382	sdc1	syndecan 1
6383	SDC2	syndecan 2
6386	sdcbp	syndecan binding protein (syntenin)
6387	CXCL12	chemokine (C-X-C motif) ligand 12 (stromal cell-derived factor 1)
6401	SELE	selectin E
6402	SELL	selectin L
6404	Selplg	selectin P ligand
6421	sfpq	splicing factor proline/glutamine-rich (polypyrimidine tract binding protein associated)
6428	SFRS3	splicing factor, arginine/serine-rich 3
6453	ITSN1	intersectin 1 (SH3 domain protein)
6469	shh	sonic hedgehog homolog (Drosophila)
6494	Sipa1	signal-induced proliferation-associated 1
6495	six1	SIX homeobox 1
6500	SKP1	S-phase kinase-associated protein 1
6502	Skp2	S-phase kinase-associated protein 2 (p45)
6590	Slpi	secretory leukocyte peptidase inhibitor
6591	snai2	snail homolog 2 (Drosophila)
6595	smarca2	SWI/SNF related, matrix associated, actin dependent regulator of chromatin, subfamily a, member 2
6597	SMARCA4	SWI/SNF related, matrix associated, actin dependent regulator of chromatin, subfamily a, member 4
6598	SMARCB1	SWI/SNF related, matrix associated, actin dependent regulator of chromatin, subfamily b, member 1
6599	SMARCC1	SWI/SNF related, matrix associated, actin dependent regulator of chromatin, subfamily c, member 1
6601	smarcc2	SWI/SNF related, matrix associated, actin dependent regulator of chromatin, subfamily c, member 2
6608	Smo	smoothened homolog (Drosophila)
6613	Sumo2	SMT3 suppressor of mif two 3 homolog 2 (S. cerevisiae) pseudogene; SMT3 suppressor of mif two 3 homolog 2 (S. cerevisiae); SMT3 suppressor of mif two 3 homolog 3 (S. cerevisiae)
6613	SUMO2P	SMT3 suppressor of mif two 3 homolog 2 (S. cerevisiae) pseudogene; SMT3 suppressor of mif two 3 homolog 2 (S. cerevisiae); SMT3 suppressor of mif two 3 homolog 3 (S. cerevisiae)
6613	SUMO3	SMT3 suppressor of mif two 3 homolog 2 (S. cerevisiae) pseudogene; SMT3 suppressor of mif two 3 homolog 2 (S. cerevisiae); SMT3 suppressor of mif two 3 homolog 3 (S. cerevisiae)
6615	snai1	snail homolog 1 (Drosophila)
6622	Snca	synuclein, alpha (non A4 component of amyloid precursor)
6647	SOD1	superoxide dismutase 1, soluble
6654	SOS1	son of sevenless homolog 1 (Drosophila)
6655	SOS2	son of sevenless homolog 2 (Drosophila)
6656	sox1	SRY (sex determining region Y)-box 1
6659	Sox4	SRY (sex determining region Y)-box 4
6667	sp1	Sp1 transcription factor
6671	SP4	Sp4 transcription factor
6696	SPP1	secreted phosphoprotein 1
6721	srebf2	sterol regulatory element binding transcription factor 2
6737	TRIM21	tripartite motif-containing 21
6755	SSTR5	somatostatin receptor 5
6772	STAT1	signal transducer and activator of transcription 1, 91kDa
6774	Stat3	signal transducer and activator of transcription 3 (acute-phase response factor)
6776	STAT5A	signal transducer and activator of transcription 5A
6778	STAT6	signal transducer and activator of transcription 6, interleukin-4 induced
6790	AURKA	aurora kinase A; aurora kinase A pseudogene 1
6790	AURKAPS1	aurora kinase A; aurora kinase A pseudogene 1
6869	Tacr1	tachykinin receptor 1
6876	TAGLN	transgelin
6878	TAF6	TAF6 RNA polymerase II, TATA box binding protein (TBP)-associated factor, 80kDa
6880	TAF9	TAF9 RNA polymerase II, TATA box binding protein (TBP)-associated factor, 32kDa
6926	tbx3	T-box 3
6932	TCF7	transcription factor 7 (T-cell specific, HMG-box)
6934	Tcf7l2	transcription factor 7-like 2 (T-cell specific, HMG-box)
6942	TCF20	transcription factor 20 (AR1)
6950	TCP1	hypothetical gene supported by BC000665; t-complex 1
6950	TCP1P3	hypothetical gene supported by BC000665; t-complex 1
7010	TEK	TEK tyrosine kinase, endothelial
7020	TFAP2A	transcription factor AP-2 alpha (activating enhancer binding protein 2 alpha)
7039	TGFA	transforming growth factor, alpha
7040	TGFB1	transforming growth factor, beta 1
7042	TGFB2	transforming growth factor, beta 2
7043	TGFB3	transforming growth factor, beta 3
7046	tgfbr1	transforming growth factor, beta receptor 1
7048	Tgfbr2	transforming growth factor, beta receptor II (70/80kDa)
7052	tgm2	transglutaminase 2 (C polypeptide, protein-glutamine-gamma-glutamyltransferase)
7068	thrB	thyroid hormone receptor, beta (erythroblastic leukemia viral (v-erb-a) oncogene homolog 2, avian)
7069	Thrsp	thyroid hormone responsive (SPOT14 homolog, rat)
7072	Tia1	TIA1 cytotoxic granule-associated RNA binding protein
7073	Tial1	TIA1 cytotoxic granule-associated RNA binding protein-like 1
7074	tiam1	T-cell lymphoma invasion and metastasis 1
7076	TIMP1	TIMP metallopeptidase inhibitor 1
7094	TLN1	talin 1
7096	TLR1	toll-like receptor 1
7097	TLR2	toll-like receptor 2
7112	TMPO	thymopoietin
7114	TMSB4X	thymosin-like 2 (pseudogene); thymosin-like 1 (pseudogene); thymosin beta 4, X-linked
7114	TMSL1	thymosin-like 2 (pseudogene); thymosin-like 1 (pseudogene); thymosin beta 4, X-linked
7114	TMSL2	thymosin-like 2 (pseudogene); thymosin-like 1 (pseudogene); thymosin beta 4, X-linked
7124	TNF	tumor necrosis factor (TNF superfamily, member 2)
7132	TNFRSF1A	tumor necrosis factor receptor superfamily, member 1A
7137	TNNI3	troponin I type 3 (cardiac)
7157	tp53	tumor protein p53
7161	TP73	tumor protein p73
7184	Hsp90b1	heat shock protein 90kDa beta (Grp94), member 1
7187	TRAF3	TNF receptor-associated factor 3
7188	TRAF5	TNF receptor-associated factor 5
7189	TRAF6	TNF receptor-associated factor 6
7201	TRHR	thyrotropin-releasing hormone receptor
7248	TSC1	tuberous sclerosis 1
7273	TTN	titin
7291	twist1	twist homolog 1 (Drosophila)
7297	Tyk2	tyrosine kinase 2
7311	uba52	ubiquitin A-52 residue ribosomal protein fusion product 1
7314	UBB	ubiquitin B
7319	UBE2A	ubiquitin-conjugating enzyme E2A (RAD6 homolog)
7323	ube2d3	ubiquitin-conjugating enzyme E2D 3 (UBC4/5 homolog, yeast); ubiquitin-conjugating enzyme E2D 3 pseudogene
7323	UBE2D3P	ubiquitin-conjugating enzyme E2D 3 (UBC4/5 homolog, yeast); ubiquitin-conjugating enzyme E2D 3 pseudogene
7324	UBE2E1	ubiquitin-conjugating enzyme E2E 1 (UBC4/5 homolog, yeast)
7326	ube2g1	ubiquitin-conjugating enzyme E2G 1 (UBC7 homolog, yeast)
7327	UBE2G2	ubiquitin-conjugating enzyme E2G 2 (UBC7 homolog, yeast)
7328	Ube2h	ubiquitin-conjugating enzyme E2H (UBC8 homolog, yeast)
7334	UBE2N	ubiquitin-conjugating enzyme E2N (UBC13 homolog, yeast)
7336	ube2v2	ubiquitin-conjugating enzyme E2 variant 2
7337	Ube3a	ubiquitin protein ligase E3A
7342	ubp1	upstream binding protein 1 (LBP-1a)
7343	UBTF	upstream binding transcription factor, RNA polymerase I
7356	SCGB1A1	secretoglobin, family 1A, member 1 (uteroglobin)
7409	VAV1	vav 1 guanine nucleotide exchange factor
7410	VAV2	vav 2 guanine nucleotide exchange factor
7415	Vcp	valosin-containing protein
7421	VDR	vitamin D (1,25- dihydroxyvitamin D3) receptor
7422	VEGFA	vascular endothelial growth factor A
7443	VRK1	vaccinia related kinase 1
7444	VRK2	vaccinia related kinase 2
7454	WAS	Wiskott-Aldrich syndrome (eczema-thrombocytopenia)
7490	wt1	Wilms tumor 1
7525	YES1	v-yes-1 Yamaguchi sarcoma viral oncogene homolog 1
7528	YY1	YY1 transcription factor
7529	YWHAB	tyrosine 3-monooxygenase/tryptophan 5-monooxygenase activation protein, beta polypeptide
7531	LOC440917	similar to 14-3-3 protein epsilon (14-3-3E) (Mitochondrial import stimulation factor L subunit) (MSF L); tyrosine 3-monooxygenase/tryptophan 5-monooxygenase activation protein, epsilon polypeptide
7531	YWHAE	similar to 14-3-3 protein epsilon (14-3-3E) (Mitochondrial import stimulation factor L subunit) (MSF L); tyrosine 3-monooxygenase/tryptophan 5-monooxygenase activation protein, epsilon polypeptide
7532	YWHAG	tyrosine 3-monooxygenase/tryptophan 5-monooxygenase activation protein, gamma polypeptide
7534	YWHAZ	tyrosine 3-monooxygenase/tryptophan 5-monooxygenase activation protein, zeta polypeptide
7538	ZFP36	zinc finger protein 36, C3H type, homolog (mouse)
7555	CNBP	CCHC-type zinc finger, nucleic acid binding protein
7704	ZBTB16	zinc finger and BTB domain containing 16
7707	ZNF148	zinc finger protein 148
7709	ZBTB17	zinc finger and BTB domain containing 17
7764	ZNF217	zinc finger protein 217
7804	LRP8	low density lipoprotein receptor-related protein 8, apolipoprotein e receptor
7849	PAX8	paired box 8
7852	CXCR4	chemokine (C-X-C motif) receptor 4
7855	fzd5	frizzled homolog 5 (Drosophila)
7879	RAB7A	RAB7A, member RAS oncogene family
7917	bat3	HLA-B associated transcript 3
8078	USP5	ubiquitin specific peptidase 5 (isopeptidase T)
8085	MLL2	myeloid/lymphoid or mixed-lineage leukemia 2
8178	Ell	elongation factor RNA polymerase II
8202	NCOA3	nuclear receptor coactivator 3
8289	ARID1A	AT rich interactive domain 1A (SWI-like)
8295	TRRAP	transformation/transcription domain-associated protein
8312	AXIN1	axin 1
8313	Axin2	axin 2
8322	FZD4	frizzled homolog 4 (Drosophila)
8325	Fzd8	frizzled homolog 8 (Drosophila)
8379	MAD1L1	MAD1 mitotic arrest deficient-like 1 (yeast)
8445	dyrk2	dual-specificity tyrosine-(Y)-phosphorylation regulated kinase 2
8450	CUL4B	cullin 4B
8452	cul3	cullin 3
8454	CUL1	cullin 1
8462	klf11	Kruppel-like factor 11
8473	Ogt	O-linked N-acetylglucosamine (GlcNAc) transferase (UDP-N-acetylglucosamine:polypeptide-N-acetylglucosaminyl transferase)
8493	PPM1D	protein phosphatase 1D magnesium-dependent, delta isoform
8500	ppfia1	protein tyrosine phosphatase, receptor type, f polypeptide (PTPRF), interacting protein (liprin), alpha 1
8503	PIK3R3	phosphoinositide-3-kinase, regulatory subunit 3 (gamma)
8515	ITGA10	integrin, alpha 10
8516	ITGA8	integrin, alpha 8
8521	Gcm1	glial cells missing homolog 1 (Drosophila)
8536	camk1	calcium/calmodulin-dependent protein kinase I
8550	MAPKAPK5	mitogen-activated protein kinase-activated protein kinase 5
8553	bhlhe40	basic helix-loop-helix family, member e40
8569	mknk1	MAP kinase interacting serine/threonine kinase 1
8607	Ruvbl1	RuvB-like 1 (E. coli)
8624	PSMG1	proteasome (prosome, macropain) assembly chaperone 1
8643	PTCH2	patched homolog 2 (Drosophila)
8648	NCOA1	nuclear receptor coactivator 1
8650	numb	numb homolog (Drosophila)
8651	Socs1	suppressor of cytokine signaling 1
8717	TRADD	TNFRSF1A-associated via death domain
8728	adam19	ADAM metallopeptidase domain 19 (meltrin beta)
8737	RIPK1	receptor (TNFRSF)-interacting serine-threonine kinase 1
8741	Tnfsf12	TNFSF12-TNFSF13 readthrough transcript; tumor necrosis factor (ligand) superfamily, member 12; tumor necrosis factor (ligand) superfamily, member 13
8741	Tnfsf12-Tnfsf13	TNFSF12-TNFSF13 readthrough transcript; tumor necrosis factor (ligand) superfamily, member 12; tumor necrosis factor (ligand) superfamily, member 13
8741	Tnfsf13	TNFSF12-TNFSF13 readthrough transcript; tumor necrosis factor (ligand) superfamily, member 12; tumor necrosis factor (ligand) superfamily, member 13
8754	Adam9	ADAM metallopeptidase domain 9 (meltrin gamma)
8767	RIPK2	receptor-interacting serine-threonine kinase 2
8787	RGS9	regulator of G-protein signaling 9
8792	Tnfrsf11a	tumor necrosis factor receptor superfamily, member 11a, NFKB activator
8795	tnfrsf10b	tumor necrosis factor receptor superfamily, member 10b
8797	TNFRSF10A	tumor necrosis factor receptor superfamily, member 10a
8809	Il18r1	interleukin 18 receptor 1
8825	Lin7a	lin-7 homolog A (C. elegans)
8829	NRP1	neuropilin 1
8841	HDAC3	histone deacetylase 3
8848	Tsc22d1	TSC22 domain family, member 1
8850	KAT2B	K(lysine) acetyltransferase 2B
8864	PER2	period homolog 2 (Drosophila)
8874	Arhgef7	Rho guanine nucleotide exchange factor (GEF) 7
8880	FUBP1	far upstream element (FUSE) binding protein 1
8997	KALRN	kalirin, RhoGEF kinase
9020	MAP3K14	mitogen-activated protein kinase kinase kinase 14
9021	socs3	suppressor of cytokine signaling 3
9031	baz1b	bromodomain adjacent to zinc finger domain, 1B
9097	USP14	ubiquitin specific peptidase 14 (tRNA-guanine transglycosylase)
9100	USP10	ubiquitin specific peptidase 10
9111	nmi	N-myc (and STAT) interactor
9112	Mta1	metastasis associated 1
9135	RABEP1	rabaptin, RAB GTPase binding effector protein 1
9181	Arhgef2	Rho/Rac guanine nucleotide exchange factor (GEF) 2
9219	Mta2	metastasis associated 1 family, member 2
9232	PTTG1	pituitary tumor-transforming 1; pituitary tumor-transforming 2
9232	Pttg2	pituitary tumor-transforming 1; pituitary tumor-transforming 2
9261	MAPKAPK2	mitogen-activated protein kinase-activated protein kinase 2
9266	CYTH2	cytohesin 2
9314	Klf4	Kruppel-like factor 4 (gut)
9318	COPS2	COP9 constitutive photomorphogenic homolog subunit 2 (Arabidopsis)
9349	rpl23	ribosomal protein L23 pseudogene 6; ribosomal protein L23
9349	RPL23P6	ribosomal protein L23 pseudogene 6; ribosomal protein L23
9367	RAB9A	RAB9A, member RAS oncogene family
9368	SLC9A3R1	solute carrier family 9 (sodium/hydrogen exchanger), member 3 regulator 1
9392	TGFBRAP1	transforming growth factor, beta receptor associated protein 1
9414	TJP2	tight junction protein 2 (zona occludens 2)
9475	ROCK2	Rho-associated, coiled-coil containing protein kinase 2
9479	MAPK8IP1	mitogen-activated protein kinase 8 interacting protein 1
9564	bcar1	similar to breast cancer anti-estrogen resistance 1; breast cancer anti-estrogen resistance 1
9564	LOC646079	similar to breast cancer anti-estrogen resistance 1; breast cancer anti-estrogen resistance 1
9568	Gabbr2	gamma-aminobutyric acid (GABA) B receptor, 2
9575	CLOCK	clock homolog (mouse)
9604	RNF14	ring finger protein 14
9611	NCOR1	nuclear receptor co-repressor 1
9612	ncor2	nuclear receptor co-repressor 2
9641	IKBKE	inhibitor of kappa light polypeptide gene enhancer in B-cells, kinase epsilon
9700	ESPL1	extra spindle pole bodies homolog 1 (S. cerevisiae)
9727	RAB11FIP3	RAB11 family interacting protein 3 (class II)
9732	DOCK4	dedicator of cytokinesis 4
9739	SETD1A	SET domain containing 1A
9759	HDAC4	histone deacetylase 4
9788	mtss1	metastasis suppressor 1
9794	MAML1	mastermind-like 1 (Drosophila)
9815	GIT2	G protein-coupled receptor kinase interacting ArfGAP 2
9821	RB1CC1	RB1-inducible coiled-coil 1
9839	Zeb2	zinc finger E-box binding homeobox 2
9844	ELMO1	engulfment and cell motility 1
9855	FARP2	FERM, RhoGEF and pleckstrin domain protein 2
9863	MAGI2	membrane associated guanylate kinase, WW and PDZ domain containing 2
9927	MFN2	mitofusin 2
9961	MVP	major vault protein
9968	MED12	mediator complex subunit 12
9988	Dmtf1	cyclin D binding myb-like transcription factor 1
9994	Casp8ap2	caspase 8 associated protein 2
10009	ZBTB33	zinc finger and BTB domain containing 33
10014	HDAC5	histone deacetylase 5
10018	BCL2L11	BCL2-like 11 (apoptosis facilitator)
10023	FRAT1	frequently rearranged in advanced T-cell lymphomas
10047	Cst8	cystatin 8 (cystatin-related epididymal specific)
10075	HUWE1	HECT, UBA and WWE domain containing 1
10131	Trap1	TNF receptor-associated protein 1
10140	Tob1	transducer of ERBB2, 1
10142	Akap9	A kinase (PRKA) anchor protein (yotiao) 9
10146	G3BP1	GTPase activating protein (SH3 domain) binding protein 1
10155	TRIM28	tripartite motif-containing 28
10159	ATP6AP2	ATPase, H+ transporting, lysosomal accessory protein 2
10188	TNK2	tyrosine kinase, non-receptor, 2
10196	PRMT3	protein arginine methyltransferase 3
10197	PSME3	proteasome (prosome, macropain) activator subunit 3 (PA28 gamma; Ki)
10215	Olig2	oligodendrocyte lineage transcription factor 2
10220	GDF11	growth differentiation factor 11
10226	PLIN3	mannose-6-phosphate receptor binding protein 1
10277	Ube4b	ubiquitination factor E4B (UFD2 homolog, yeast)
10288	LILRB2	leukocyte immunoglobulin-like receptor, subfamily B (with TM and ITIM domains), member 2
10395	DLC1	deleted in liver cancer 1
10399	GNB2L1	guanine nucleotide binding protein (G protein), beta polypeptide 2-like 1
10403	NDC80	NDC80 homolog, kinetochore complex component (S. cerevisiae)
10451	VAV3	vav 3 guanine nucleotide exchange factor
10461	MERTK	c-mer proto-oncogene tyrosine kinase
10467	Znhit1	zinc finger, HIT type 1
10488	creb3	cAMP responsive element binding protein 3
10498	carm1	coactivator-associated arginine methyltransferase 1
10499	Ncoa2	nuclear receptor coactivator 2
10524	kat5	K(lysine) acetyltransferase 5
10636	RGS14	regulator of G-protein signaling 14
10642	IGF2BP1	insulin-like growth factor 2 mRNA binding protein 1
10657	Khdrbs1	KH domain containing, RNA binding, signal transduction associated 1
10664	CTCF	CCCTC-binding factor (zinc finger protein)
10672	Gna13	guanine nucleotide binding protein (G protein), alpha 13
10741	RBBP9	retinoblastoma binding protein 9
10752	CHL1	cell adhesion molecule with homology to L1CAM (close homolog of L1)
10771	zmynd11	zinc finger, MYND domain containing 11
10842	C7orf16	chromosome 7 open reading frame 16
10856	RUVBL2	RuvB-like 2 (E. coli)
10859	LILRB1	leukocyte immunoglobulin-like receptor, subfamily B (with TM and ITIM domains), member 1
10886	NPFFR2	neuropeptide FF receptor 2
10915	tcerg1	transcription elongation regulator 1
10950	BTG3	BTG family, member 3
10956	OS9	osteosarcoma amplified 9, endoplasmic reticulum associated protein
10971	ywhaq	tyrosine 3-monooxygenase/tryptophan 5-monooxygenase activation protein, theta polypeptide
10987	Cops5	COP9 constitutive photomorphogenic homolog subunit 5 (Arabidopsis)
11033	ADAP1	ArfGAP with dual PH domains 1
11073	TOPBP1	topoisomerase (DNA) II binding protein 1
11100	HNRNPUL1	heterogeneous nuclear ribonucleoprotein U-like 1
11107	PRDM5	PR domain containing 5
11143	LOC648927	MYST histone acetyltransferase 2; similar to MYST histone acetyltransferase 2
11143	Myst2	MYST histone acetyltransferase 2; similar to MYST histone acetyltransferase 2
11183	Map4k5	mitogen-activated protein kinase kinase kinase kinase 5
11200	CHEK2	protein kinase CHK2-like; CHK2 checkpoint homolog (S. pombe); similar to hCG1983233
11200	LOC100133012	protein kinase CHK2-like; CHK2 checkpoint homolog (S. pombe); similar to hCG1983233
11200	LOC646096	protein kinase CHK2-like; CHK2 checkpoint homolog (S. pombe); similar to hCG1983233
11214	AKAP13	A kinase (PRKA) anchor protein 13
11279	klf8	Kruppel-like factor 8
11315	PARK7	Parkinson disease (autosomal recessive, early onset) 7
11339	Oip5	Opa interacting protein 5
22801	ITGA11	integrin, alpha 11
22858	ICK	intestinal cell (MAK-like) kinase
22895	RPH3A	rabphilin 3A homolog (mouse)
22900	CARD8	caspase recruitment domain family, member 8
22924	MAPRE3	microtubule-associated protein, RP/EB family, member 3
22927	habp4	hyaluronan binding protein 4
22937	SCAP	SREBF chaperone
23092	arhgap26	Rho GTPase activating protein 26
23186	RCOR1	REST corepressor 1
23263	MCF2L	MCF.2 cell line derived transforming sequence-like
23309	Sin3b	SIN3 homolog B, transcription regulator (yeast)
23327	Nedd4l	neural precursor cell expressed, developmentally down-regulated 4-like
23429	RYBP	RING1 and YY1 binding protein
23528	ZNF281	zinc finger protein 281
23529	CLCF1	cardiotrophin-like cytokine factor 1
23542	Mapk8ip2	mitogen-activated protein kinase 8 interacting protein 2
23569	PADI4	peptidyl arginine deiminase, type IV
23607	CD2AP	CD2-associated protein
23621	BACE1	beta-site APP-cleaving enzyme 1
23770	FKBP8	FK506 binding protein 8, 38kDa
24148	LOC653889	similar to U5 snRNP-associated 102 kDa protein (U5-102 kDa protein); PRP6 pre-mRNA processing factor 6 homolog (S. cerevisiae)
24148	PRPF6	similar to U5 snRNP-associated 102 kDa protein (U5-102 kDa protein); PRP6 pre-mRNA processing factor 6 homolog (S. cerevisiae)
25791	Ngef	neuronal guanine nucleotide exchange factor
25818	KLK5	kallikrein-related peptidase 5
25898	RCHY1	ring finger and CHY zinc finger domain containing 1
25924	MYRIP	myosin VIIA and Rab interacting protein
25942	SIN3A	SIN3 homolog A, transcription regulator (yeast)
25970	SH2B1	SH2B adaptor protein 1
26119	ldlrap1	low density lipoprotein receptor adaptor protein 1
26230	TIAM2	T-cell lymphoma invasion and metastasis 2
26271	Fbxo5	F-box protein 5
26272	FBXO4	F-box protein 4
26287	ANKRD2	ankyrin repeat domain 2 (stretch responsive muscle)
26292	MYCBP	c-myc binding protein
26959	HBP1	HMG-box transcription factor 1
26986	PABPC1	poly(A) binding protein, cytoplasmic pseudogene 5; poly(A) binding protein, cytoplasmic 1
26986	PABPC1P4	poly(A) binding protein, cytoplasmic pseudogene 5; poly(A) binding protein, cytoplasmic 1
27044	SND1	staphylococcal nuclease and tudor domain containing 1
27113	BBC3	BCL2 binding component 3
27202	GPR77	G protein-coupled receptor 77
27250	PDCD4	programmed cell death 4 (neoplastic transformation inhibitor)
27429	HTRA2	HtrA serine peptidase 2
28514	DLL1	delta-like 1 (Drosophila)
28951	TRIB2	tribbles homolog 2 (Drosophila)
28962	OSTM1	osteopetrosis associated transmembrane protein 1
29028	ATAD2	ATPase family, AAA domain containing 2
29108	pycard	PYD and CARD domain containing
29110	Tbk1	TANK-binding kinase 1
29123	ankrd11	ankyrin repeat domain 11; hypothetical protein LOC100128265
29123	LOC100128265	ankyrin repeat domain 11; hypothetical protein LOC100128265
29127	racgap1	Rac GTPase activating protein 1 pseudogene; Rac GTPase activating protein 1
29127	RACGAP1P	Rac GTPase activating protein 1 pseudogene; Rac GTPase activating protein 1
30001	ERO1L	ERO1-like (S. cerevisiae)
30835	CD209	CD209 molecule
50616	il22	interleukin 22
50632	calY	calcyon neuron-specific vesicular protein
50649	ARHGEF4	Rho guanine nucleotide exchange factor (GEF) 4
50807	asap1	ArfGAP with SH3 domain, ankyrin repeat and PH domain 1
50859	SPOCK3	sparc/osteonectin, cwcv and kazal-like domains proteoglycan (testican) 3
50861	STMN3	stathmin-like 3
51176	Lef1	lymphoid enhancer-binding factor 1
51274	KLF3	Kruppel-like factor 3 (basic)
51284	TLR7	toll-like receptor 7
51330	TNFRSF12A	tumor necrosis factor receptor superfamily, member 12A
51343	FZR1	fizzy/cell division cycle 20 related 1 (Drosophila)
51429	SNX9	sorting nexin 9
51512	GTSE1	G-2 and S-phase expressed 1
51547	Sirt7	sirtuin (silent mating type information regulation 2 homolog) 7 (S. cerevisiae)
51655	rasd1	RAS, dexamethasone-induced 1
51705	EMCN	endomucin
51741	WWOX	WW domain containing oxidoreductase
51764	GNG13	guanine nucleotide binding protein (G protein), gamma 13
51776	ZAK	sterile alpha motif and leucine zipper containing kinase AZK
54205	CYCS	cytochrome c, somatic
54567	DLL4	delta-like 4 (Drosophila)
54778	Rnf111	ring finger protein 111
54971	BANP	BTG3 associated nuclear protein
55294	FBXW7	F-box and WD repeat domain containing 7
55536	CDCA7L	cell division cycle associated 7-like
55553	Sox6	SRY (sex determining region Y)-box 6
55770	Exoc2	exocyst complex component 2
55897	MESP1	mesoderm posterior 1 homolog (mouse)
55914	Erbb2ip	erbb2 interacting protein
55929	DMAP1	DNA methyltransferase 1 associated protein 1
56144	PCDHA1	protocadherin alpha 1; protocadherin alpha 4
56144	Pcdha4	protocadherin alpha 1; protocadherin alpha 4
56288	Pard3	par-3 partitioning defective 3 homolog (C. elegans)
56547	MMP26	matrix metallopeptidase 26
56605	Ero1lb	ERO1-like beta (S. cerevisiae)
56647	bccip	BRCA2 and CDKN1A interacting protein
57167	sall4	sal-like 4 (Drosophila)
57448	birc6	baculoviral IAP repeat-containing 6
57496	MKL2	MKL/myocardin-like 2
57521	RPTOR	regulatory associated protein of MTOR, complex 1
57522	SRGAP1	SLIT-ROBO Rho GTPase activating protein 1
57580	prex1	phosphatidylinositol-3,4,5-trisphosphate-dependent Rac exchange factor 1
57591	mkl1	megakaryoblastic leukemia (translocation) 1
57646	usp28	ubiquitin specific peptidase 28
57650	kiaa1524	KIAA1524
57727	NCOA5	nuclear receptor coactivator 5
58484	NLRC4	NLR family, CARD domain containing 4
58985	IL22RA1	interleukin 22 receptor, alpha 1
63967	clspn	claspin homolog (Xenopus laevis)
64127	NOD2	nucleotide-binding oligomerization domain containing 2
64321	Sox17	SRY (sex determining region Y)-box 17
64326	Rfwd2	ring finger and WD repeat domain 2
64386	Mmp25	matrix metallopeptidase 25
64506	CPEB1	cytoplasmic polyadenylation element binding protein 1
65078	RTN4R	reticulon 4 receptor
79718	TBL1XR1	transducin (beta)-like 1 X-linked receptor 1
80314	epc1	enhancer of polycomb homolog 1 (Drosophila)
80332	ADAM33	ADAM metallopeptidase domain 33
83439	tcf7l1	transcription factor 7-like 1 (T-cell specific, HMG-box)
83660	TLN2	talin 2
84148	Myst1	MYST histone acetyltransferase 1
84433	CARD11	caspase recruitment domain family, member 11
84447	SYVN1	synovial apoptosis inhibitor 1, synoviolin
85363	TRIM5	tripartite motif-containing 5
85409	NKD2	naked cuticle homolog 2 (Drosophila)
85440	DOCK7	dedicator of cytokinesis 7
89780	WNT3A	wingless-type MMTV integration site family, member 3A
90427	Bmf	Bcl2 modifying factor
90480	gadd45gip1	growth arrest and DNA-damage-inducible, gamma interacting protein 1
92283	ZNF461	zinc finger protein 461
114609	TIRAP	toll-interleukin 1 receptor (TIR) domain containing adaptor protein
115426	UHRF2	ubiquitin-like with PHD and ring finger domains 2
115557	GEFT	RhoA/RAC/CDC42 exchange factor; solute carrier family 26, member 10
115557	SLC26A10	RhoA/RAC/CDC42 exchange factor; solute carrier family 26, member 10
121340	SP7	Sp7 transcription factor
130399	ACVR1C	activin A receptor, type IC
132625	Zfp42	zinc finger protein 42 homolog (mouse)
140690	CTCFL	CCCTC-binding factor (zinc finger protein)-like
142678	mib2	mindbomb homolog 2 (Drosophila)
145258	Gsc	goosecoid homeobox
150094	Sik1	salt-inducible kinase 1
151636	dtx3l	deltex 3-like (Drosophila)
152503	SH3D19	SH3 domain containing 19
158798	Akap14	A kinase (PRKA) anchor protein 14
161882	ZFPM1	zinc finger protein, multitype 1
200186	CRTC2	CREB regulated transcription coactivator 2
221178	SPATA13	spermatogenesis associated 13
246330	PELI3	pellino homolog 3 (Drosophila)
253738	EBF3	early B-cell factor 3
260425	MAGI3	membrane associated guanylate kinase, WW and PDZ domain containing 3
266740	Magea2	melanoma antigen family A, 2; melanoma antigen family A, 2B
266740	MAGEA2B	melanoma antigen family A, 2; melanoma antigen family A, 2B
340061	Tmem173	transmembrane protein 173
388585	hes5	hairy and enhancer of split 5 (Drosophila)
414062	CCL3L1	chemokine (C-C motif) ligand 3-like 3; chemokine (C-C motif) ligand 3-like 1
414062	CCL3L3	chemokine (C-C motif) ligand 3-like 3; chemokine (C-C motif) ligand 3-like 1
653361	ncf1	neutrophil cytosolic factor 1; neutrophil cytosolic factor 1C pseudogene
653361	NCF1C	neutrophil cytosolic factor 1; neutrophil cytosolic factor 1C pseudogene
